# Supplementary material for: Self-assembly of T-shape 2H-benzo[d][1,2,3]-triazoles. Optical waveguide and photophysical properties
Source: Royal Society of Chemistry journal article supplement (doi:10.1039/c6ra02473d), 2016-01-01

## Supporting Information

### **Self-assembly of T-shape 2*H*-benzo[d][1,2,3]-triazoles. Optical waveguide and photophysical properties.**

Iván Torres,<sup>[a]</sup> José R. Carrillo,<sup>[a]</sup> Ángel Díaz-Ortiz,<sup>[a]</sup> Raúl Martín<sup>[a]</sup>, M. Victoria Gómez,<sup>[a]</sup> Linda Stegemann,<sup>[b]</sup> Cristian A. Strassert,<sup>[b]</sup> Jesús Orduna<sup>[c]</sup>, Julia Buendía,<sup>[d]</sup> Elisa E. Greciano,<sup>[d]</sup> Jorge S. Valera,<sup>[d]</sup> Emilio Matesanz,<sup>[e]</sup> Luis Sánchez\*,<sup>[d]</sup> and Pilar Prieto\*<sup>[a]</sup>

**Figure S1.** Theoretical UV-Vis absorption spectra, wavelength and oscillator strength values and orbitals contribution for the transition of compounds **1a** (a), **1b** (b), **1c** (c) and **1d** (d), calculated at CPCM-M06-2X/6-311+G(2d,p) in dichloromethane.

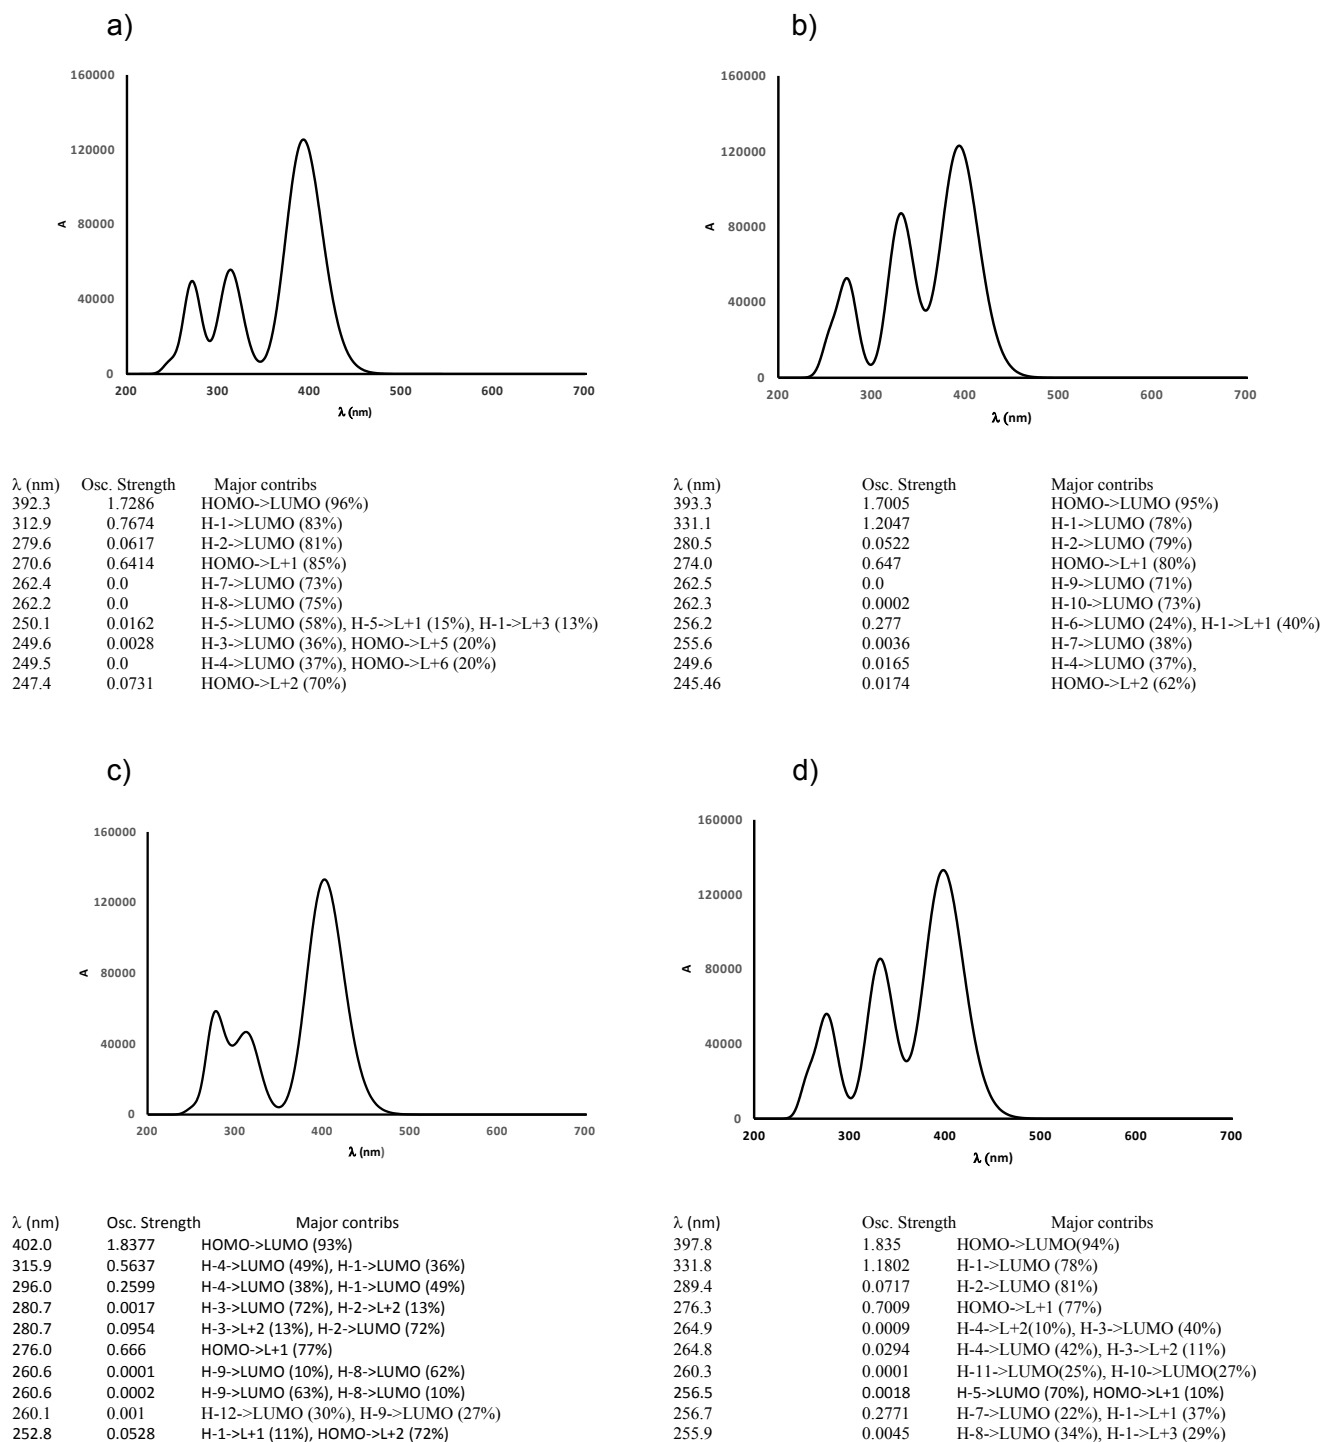

**Figure S2. Horizontal and vertical aggregates of compound 1b computed at B97D/6-31G\***

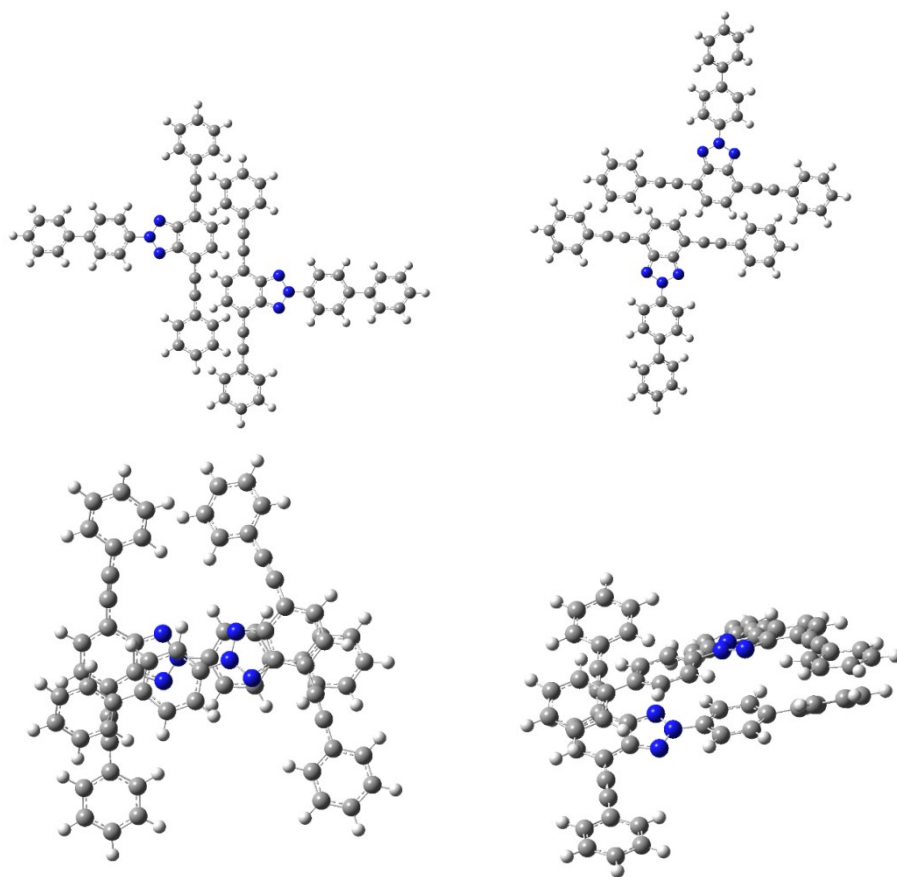

**Figure S3.** Photophysical dates

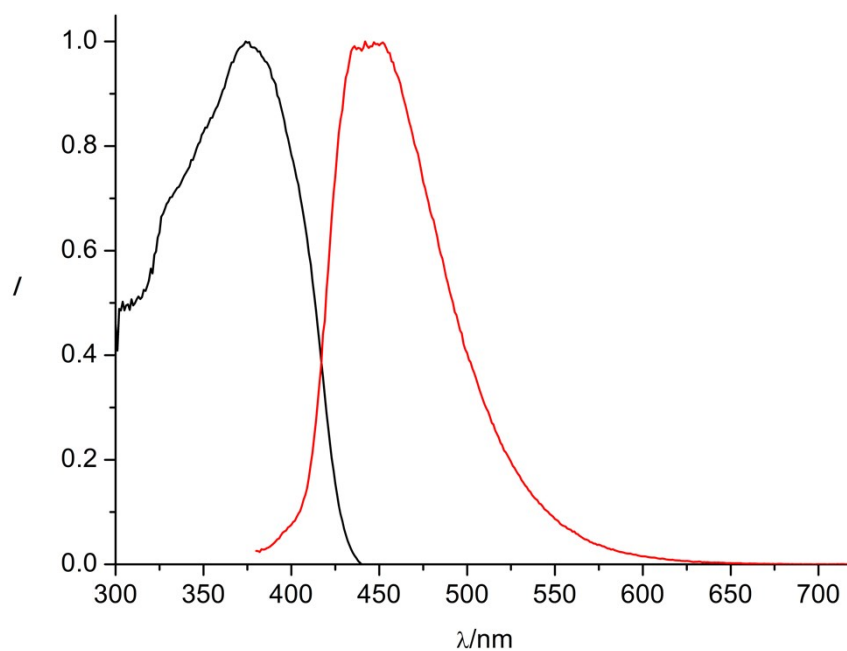

**Excitation** (black) and **emission** (red) spectra of **1a** in  $CH_2Cl_2$  ( $\lambda_{exc} = 320$  nm;  $\lambda_{em} = 460$  nm).

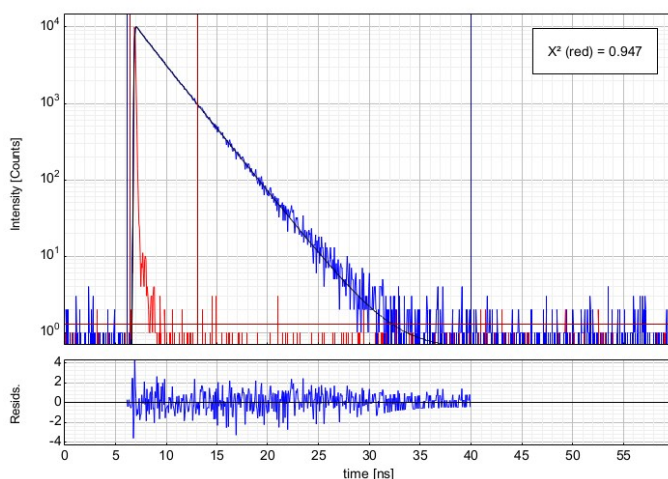

| Parameter        | Value   | Conf. Lower | Conf. Upper |
|------------------|---------|-------------|-------------|
| $A_1$ [Cnts]     | 10438.5 | -57.4       | +57.4       |
| $\tau_1$ [ns]    | 2.6392  | -0.0102     | +0.0102     |
| $A_2$ [Cnts]     | 1062    | -147        | +147        |
| $\tau_2$ [ns]    | 0.767   | -0.121      | +0.121      |
| Bkgr. Dec [Cnts] | 0.605   | -0.377      | +0.377      |
| Bkgr. IRF [Cnts] | 1.273   | -0.796      | +0.796      |
| Shift IRF [ns]   | 0.08752 | -0.00240    | +0.00240    |

Left: Time-resolved luminescence decay of **1a** in  $CH_2Cl_2$  including the instrument response function and the residuals ( $\lambda_{exc} = 376.7$  nm). Right: Fitting parameters including pre-exponential factors and confidence limits.

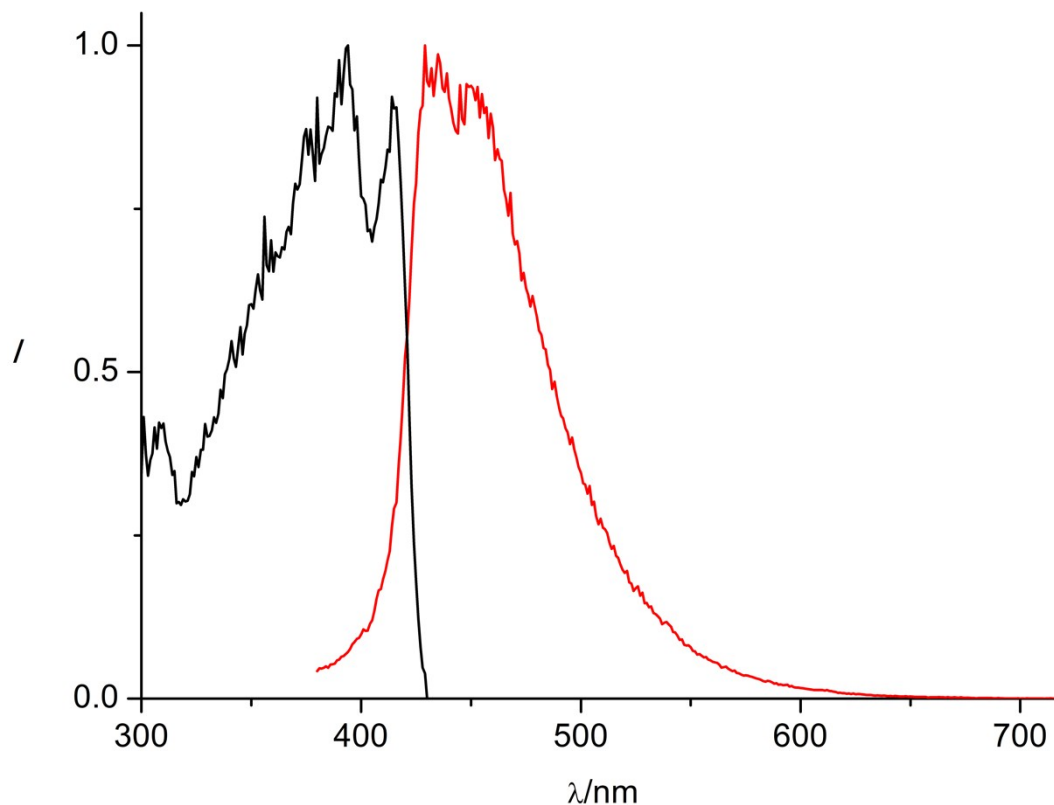

Excitation (black) and emission (red) spectra of **1a** in a frozen glassy matrix of  $CH_2Cl_2:MeOH$  (1:1) at 77 K ( $\lambda_{exc} = 320$  nm;  $\lambda_{em} = 450$  nm).

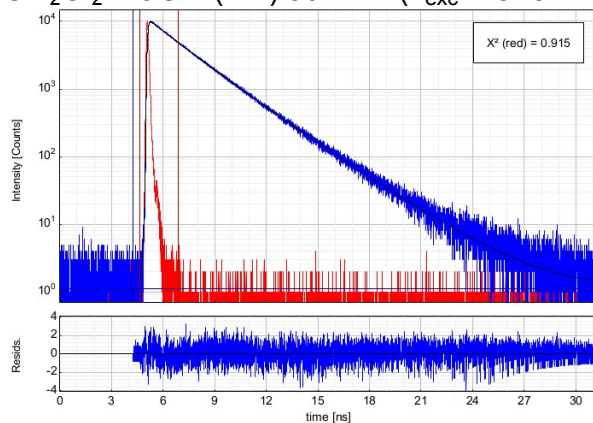

| Parameter        | Value   | Conf. Lower | Conf. Upper |
|------------------|---------|-------------|-------------|
| $A_1$ [Cnts]     | 5921.6  | -46.1       | +46.1       |
| $\tau_1$ [ns]    | 2.6657  | -0.0135     | +0.0135     |
| $A_2$ [Cnts]     | 5150.5  | -69.0       | +69.0       |
| $\tau_2$ [ns]    | 1.7417  | -0.0204     | +0.0204     |
| Bkgr. Dec [Cnts] | 1.112   | -0.496      | +0.496      |
| Bkgr. IRF [Cnts] | -1.24   | -1.97       | +1.97       |
| Shift IRF [ns]   | 0.01325 | -0.00188    | +0.00188    |

Left: Time-resolved luminescence decay of **1a** in a frozen glassy matrix  $CH_2Cl_2:MeOH$  (1:1) at 77K including the instrument response function and the residuals ( $\lambda_{exc} = 376.7$  nm). Right: Fitting parameters including pre-exponential factors and confidence limits.

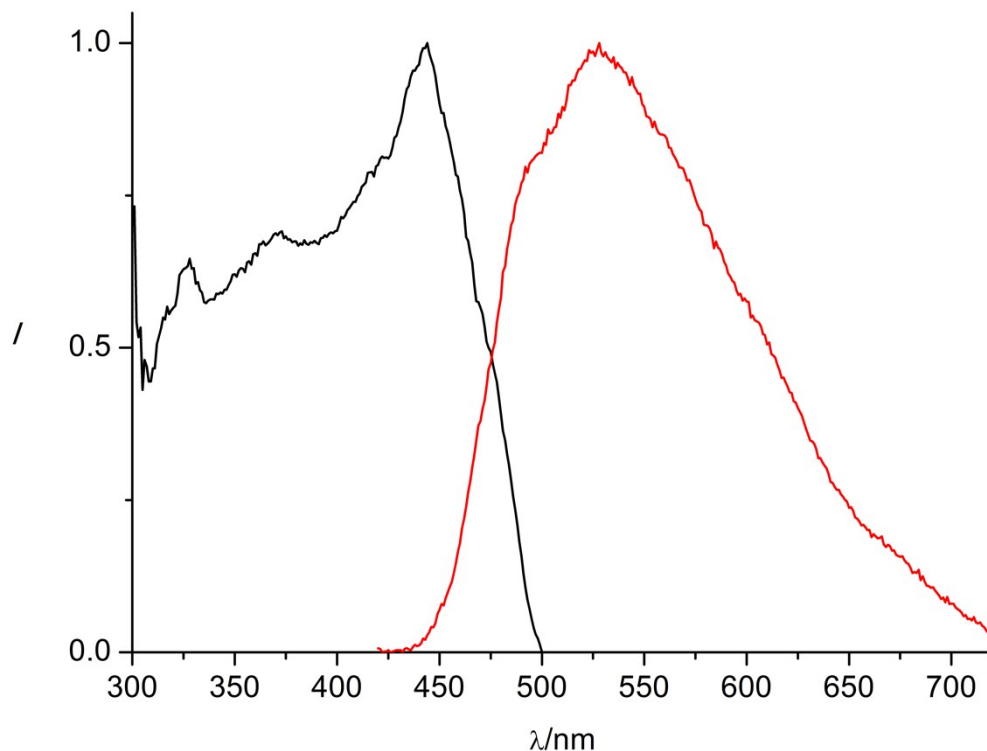

Excitation (black) and emission (red) spectra of **1a** in the solid state ( $\lambda_{\text{exc}} = 320$  nm;  $\lambda_{\text{em}} = 530$  nm).

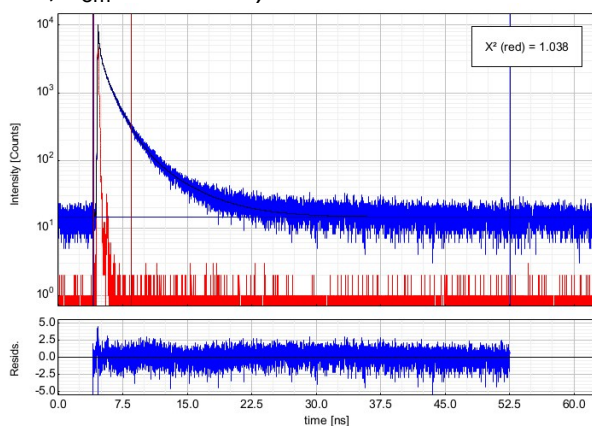

| Parameter                | Value    | Conf. Lower | Conf. Upper |
|--------------------------|----------|-------------|-------------|
| $A_1$ [Cnts]             | 306.3    | -16.2       | +16.2       |
| $\tau_1$ [ns]            | 4.374    | -0.150      | +0.150      |
| $A_2$ [Cnts]             | 2835.5   | -64.2       | +64.2       |
| $\tau_2$ [ns]            | 1.3601   | -0.0242     | +0.0242     |
| $A_3$ [Cnts]             | 3541     | -247        | +247        |
| $\tau_3$ [ns]            | 0.2810   | -0.0194     | +0.0194     |
| Bkgr. Dec. [Cnts]        | 14.457   | -0.771      | +0.771      |
| Bkgr. IREF [Cnts]        | -0.0270  | -2.75       | +2.75       |
| Shift IREF [ns]          | -0.01671 | -0.00192    | +0.00192    |
| $A_{\text{Scat}}$ [Cnts] | 253800   | -11400      | +11400      |

Left: Time-resolved luminescence decay of **1a** in the solid state including the instrument response function and the residuals ( $\lambda_{\text{exc}} = 376.7$  nm). Right: Fitting parameters including pre-exponential factors and confidence limits.

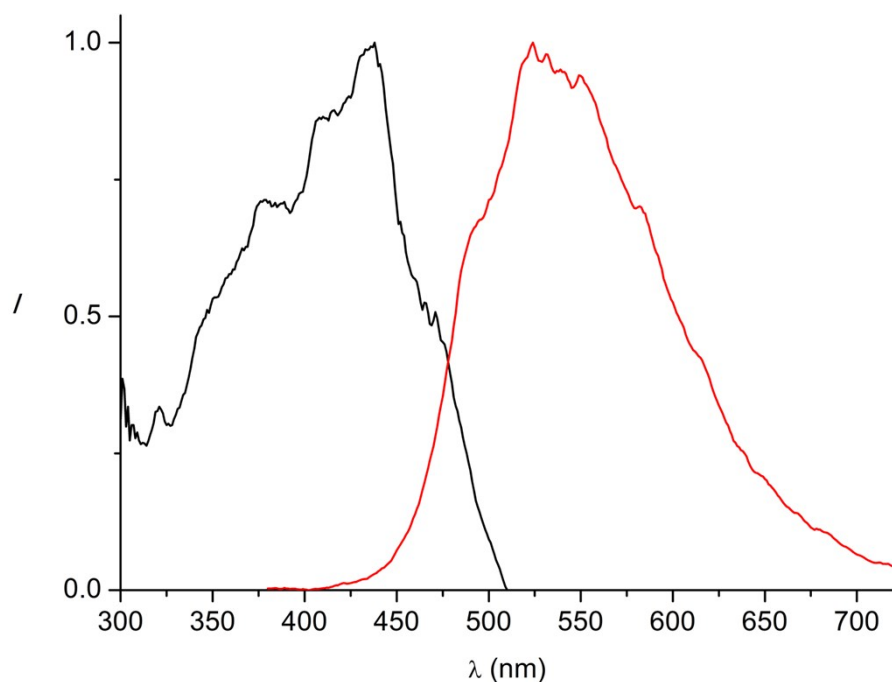

Excitation (black) and emission (red) spectra of **1a** in crystal ( $\lambda_{\text{exc}} = 320 \text{ nm}$ ;  $\lambda_{\text{em}} = 540 \text{ nm}$ ).

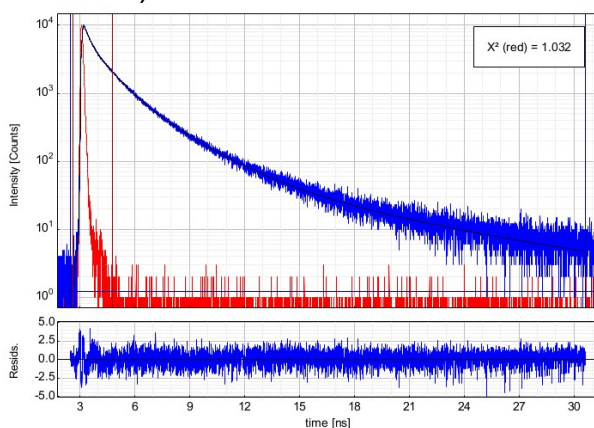

| Parameter             | Value   | Conf. Lower | Conf. Upper |
|-----------------------|---------|-------------|-------------|
| A <sub>1</sub> [Cnts] | 115.32  | -6.22       | +6.22       |
| $\tau_1$ [ns]         | 7.881   | -0.249      | +0.249      |
| A <sub>2</sub> [Cnts] | 2173.4  | -37.5       | +37.5       |
| $\tau_2$ [ns]         | 2.3180  | -0.0260     | +0.0260     |
| A <sub>3</sub> [Cnts] | 5367.6  | -93.7       | +93.7       |
| $\tau_3$ [ns]         | 0.9366  | -0.0144     | +0.0144     |
| A <sub>4</sub> [Cnts] | 6564    | -287        | +287        |
| $\tau_4$ [ns]         | 0.2029  | -0.0103     | +0.0103     |
| Bkgr. Dec [Cnts]      | 1.232   | -0.704      | +0.704      |
| Bkgr. IRF [Cnts]      | -1.60   | -2.07       | +2.07       |
| Shift IRF [ns]        | 0.08974 | -0.00182    | +0.00182    |

Left: Time-resolved luminescence decay of **1a** in crystal including the instrument response function and the residuals ( $\lambda_{\text{exc}} = 376.7 \text{ nm}$ ). Right: Fitting parameters including pre-exponential factors and confidence limits.

|         | $\lambda_{\text{Exc}}$ (nm) | $\lambda_{\text{Em}}$ (nm) | $\tau$ (ns) | $\Phi$ ( $\lambda_{\text{exc}}=320\text{nm}$ ) |
|---------|-----------------------------|----------------------------|-------------|------------------------------------------------|
| aerated | 374                         | 442                        | 2,586       | 0,55                                           |
| 77K     | 394                         | 429                        | 2,331       |                                                |
| solid   | 444                         | 528                        | 1,839       | 0,05                                           |
| crystal | 438                         | 524                        | 1,936       | 0,10                                           |

Summary of photophysical data for **1a**. Intensity-weighted average lifetimes.

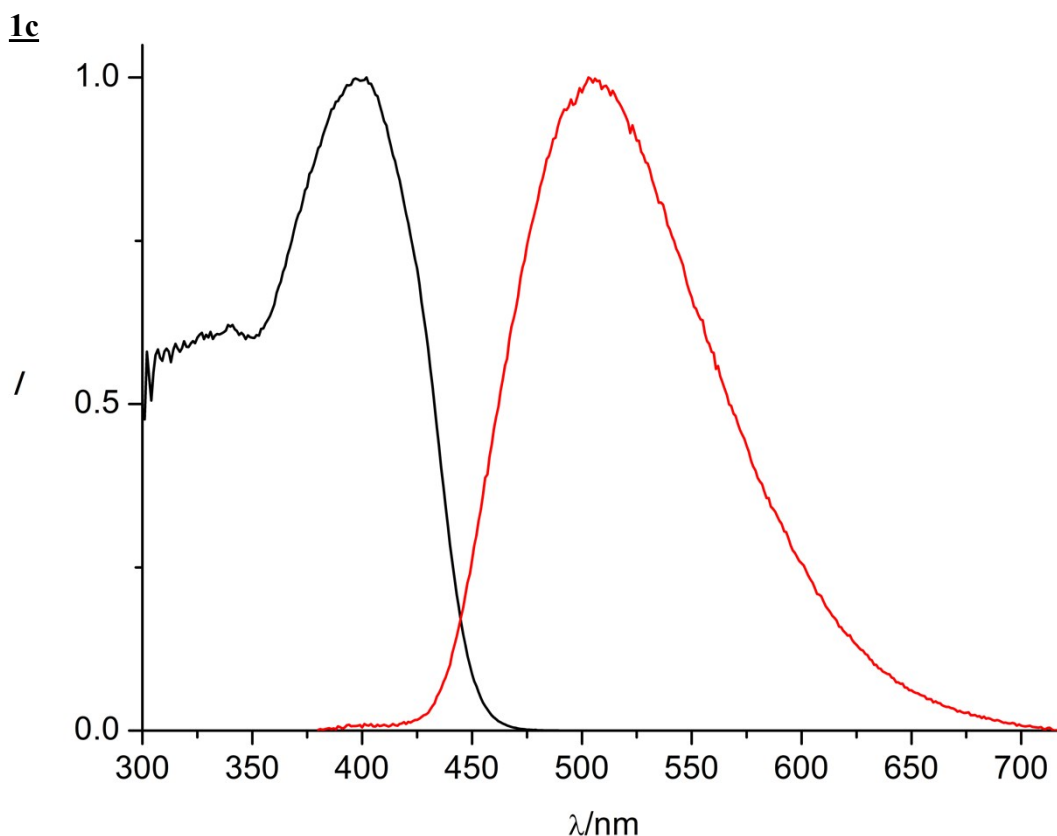

Excitation (black) and emission (red) spectra of **1c** in  $CH_2Cl_2$  ( $\lambda_{exc} = 320$  nm;  $\lambda_{em} = 510$  nm).

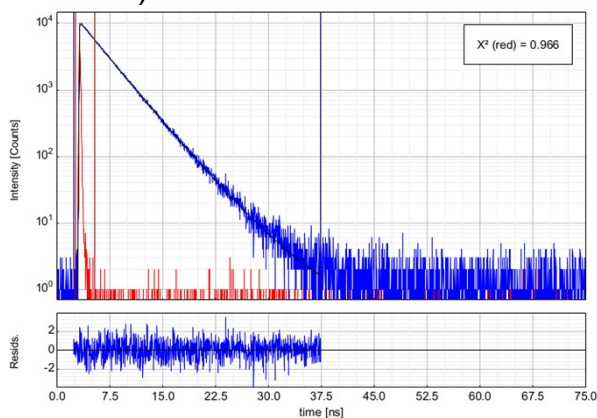

| Parameter        | Value   | Conf. Lower | Conf. Upper |
|------------------|---------|-------------|-------------|
| $A_1$ [Cnts]     | 1072.0  | -34.6       | +34.6       |
| $\tau_1$ [ns]    | 4.7939  | -0.0817     | +0.0817     |
| $A_2$ [Cnts]     | 9795.6  | -55.0       | +55.0       |
| $\tau_2$ [ns]    | 3.2113  | -0.0136     | +0.0136     |
| Bkgr. Dec [Cnts] | 0.550   | -0.589      | +0.589      |
| Bkgr. IRF [Cnts] | -0.63   | -1.43       | +1.43       |
| Shift IRF [ns]   | 0.15753 | -0.00170    | +0.00170    |

Left: Time-resolved luminescence decay of **1c** in  $CH_2Cl_2$  including the instrument response function and the residuals ( $\lambda_{exc} = 376.7$  nm). Right: Fitting parameters including pre-exponential factors and confidence limits.



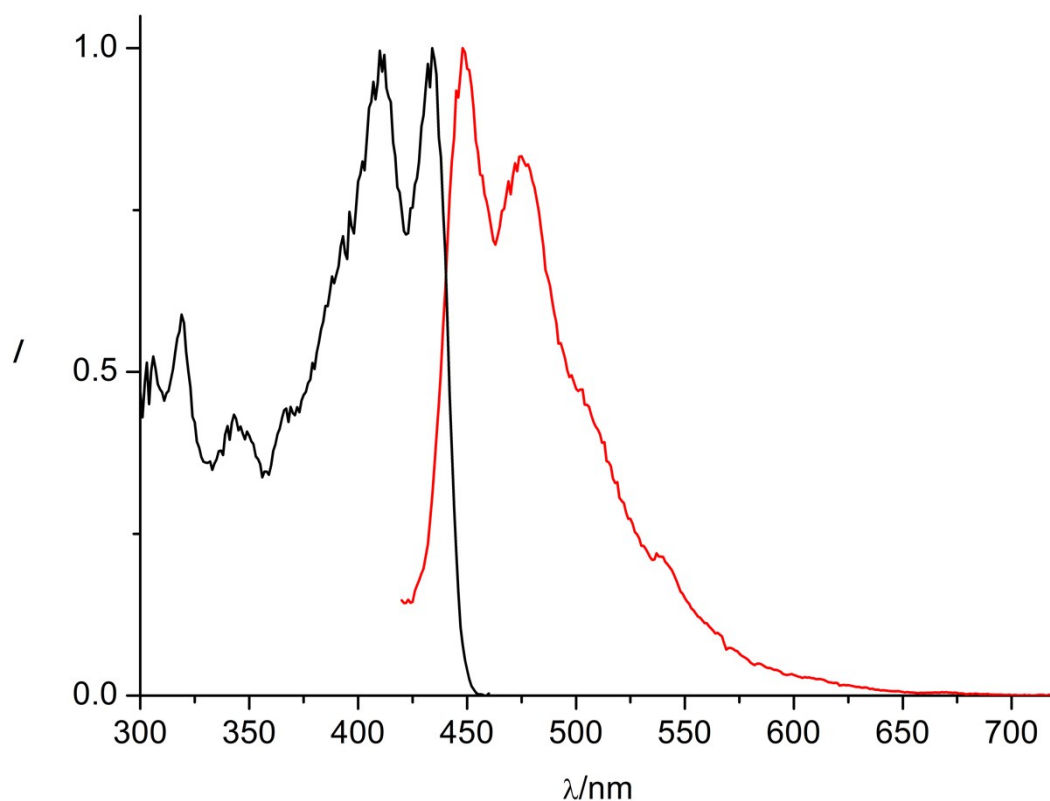

Excitation (black) and emission (red) spectra of **1C** in a frozen glassy matrix of  $CH_2Cl_2:MeOH$  (1:1) at 77 K ( $\lambda_{exc} = 320$  nm;  $\lambda_{em} = 480$  nm).

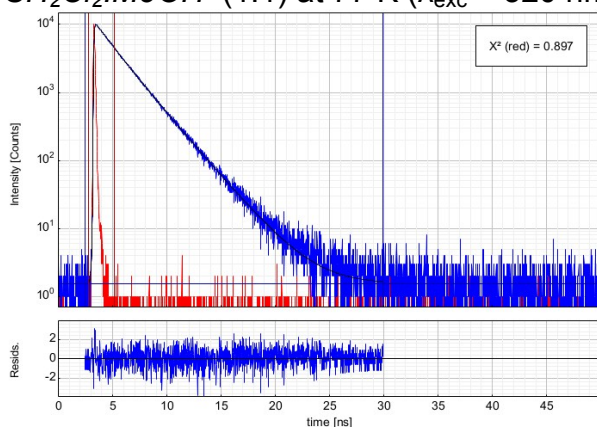

| Parameter        | Value   | Conf. Lower | Conf. Upper |
|------------------|---------|-------------|-------------|
| $A_1$ [Cnts]     | 7838.3  | -50.7       | +50.7       |
| $\tau_1$ [ns]    | 2.3908  | -0.0104     | +0.0104     |
| $A_2$ [Cnts]     | 3478.8  | -79.3       | +79.3       |
| $\tau_2$ [ns]    | 1.4512  | -0.0308     | +0.0308     |
| Bkgr. Dec [Cnts] | 1.542   | -0.457      | +0.457      |
| Bkgr. IRF [Cnts] | -0.210  | -1.54       | +1.54       |
| Shift IRF [ns]   | 0.06760 | -0.00190    | +0.00190    |

Left: Time-resolved luminescence decay of **1C** in a frozen glassy matrix  $CH_2Cl_2:MeOH$  (1:1) at 77K including the instrument response function and the residuals ( $\lambda_{exc} = 376.7$  nm). Right: Fitting parameters including pre-exponential factors and confidence limits.

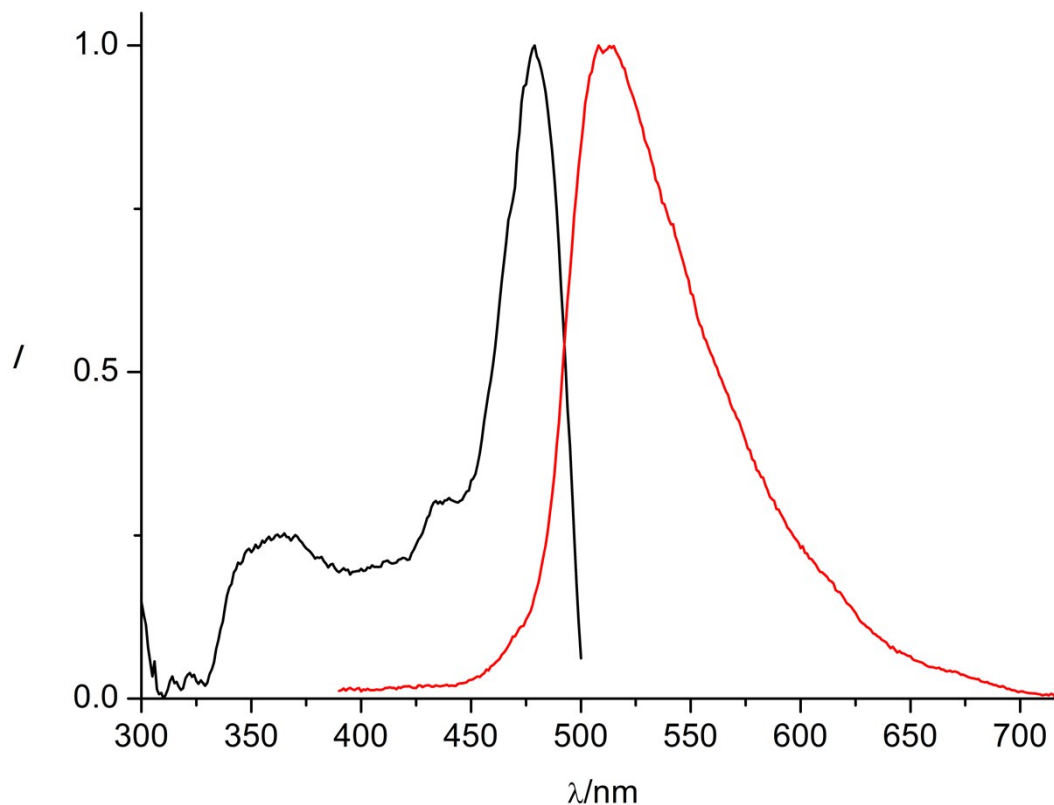

Excitation (black) and emission (red) spectra of **1C** in the solid state ( $\lambda_{\text{exc}} = 320$  nm;  $\lambda_{\text{em}} = 530$  nm).

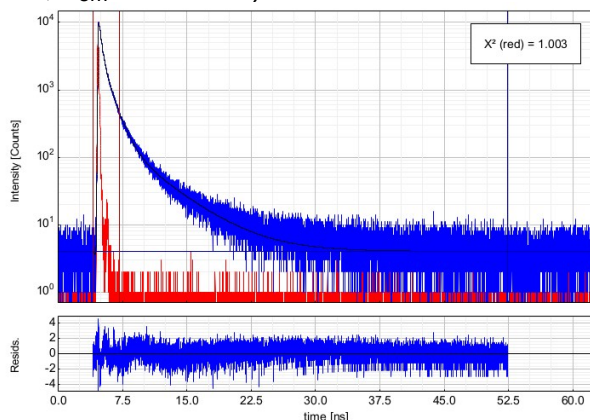

| Parameter                | Value   | Conf. Lower | Conf. Upper |
|--------------------------|---------|-------------|-------------|
| $A_1$ [Cnts]             | 242.0   | -12.9       | +12.9       |
| $\tau_1$ [ns]            | 4.321   | -0.138      | +0.138      |
| $A_2$ [Cnts]             | 3804.3  | -89.7       | +89.7       |
| $\tau_2$ [ns]            | 0.9950  | -0.0169     | +0.0169     |
| $A_3$ [Cnts]             | 10801   | -310        | +310        |
| $\tau_3$ [ns]            | 0.25353 | -0.00733    | +0.00733    |
| Bkgr. Dec [Cnts]         | 4.025   | -0.464      | +0.464      |
| Bkgr. IRF [Cnts]         | 0.427   | -2.37       | +2.37       |
| Shift IRF [ns]           | 0.02348 | -0.00226    | +0.00226    |
| $A_{\text{Scat}}$ [Cnts] | 7610    | -8120       | +8120       |

Left: Time-resolved luminescence decay of **1C** in the solid state including the instrument response function and the residuals ( $\lambda_{\text{exc}} = 376.7$  nm). Right: Fitting parameters including pre-exponential factors and confidence limits.

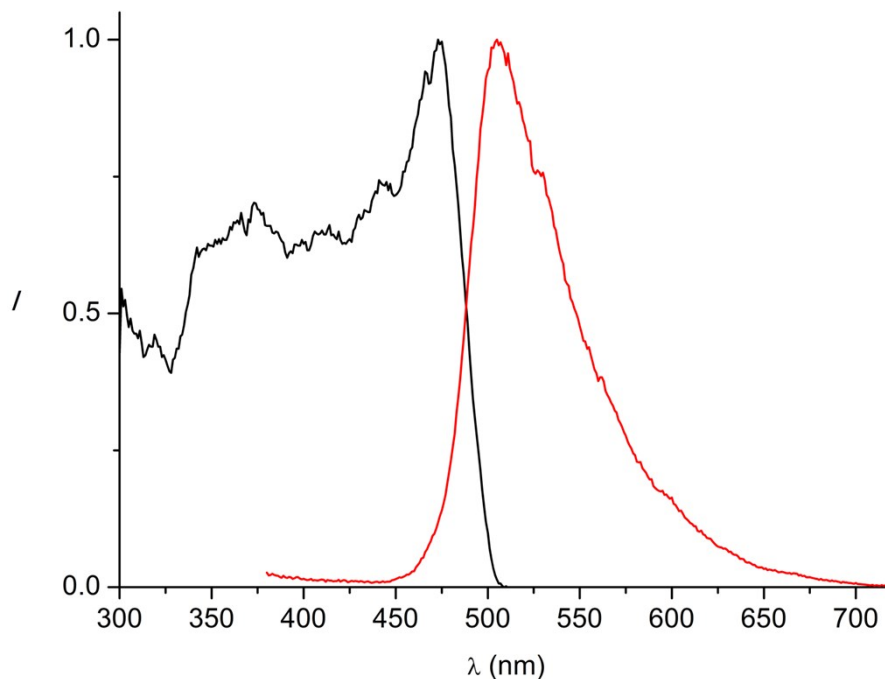

Excitation (black) and emission (red) spectra of **1C** in crystal ( $\lambda_{\text{exc}} = 320 \text{ nm}$ ;  $\lambda_{\text{em}} = 540 \text{ nm}$ ).

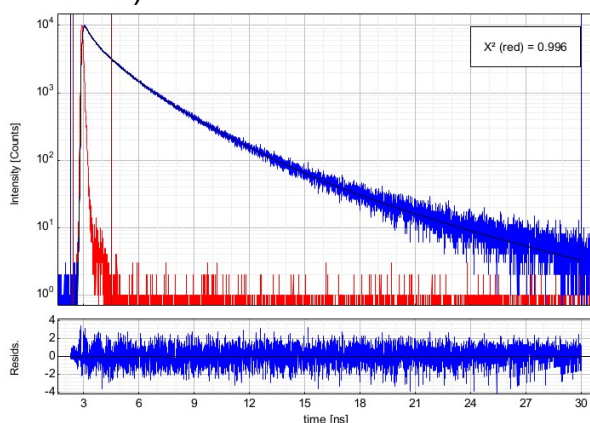

| Parameter        | Value    | Conf. Lower | Conf. Upper |
|------------------|----------|-------------|-------------|
| $A_1$ [Cnts]     | 312.1    | -12.6       | +12.6       |
| $\tau_1$ [ns]    | 5.759    | -0.118      | +0.118      |
| $A_2$ [Cnts]     | 3844.9   | -43.3       | +43.3       |
| $\tau_2$ [ns]    | 2.4108   | -0.0188     | +0.0188     |
| $A_3$ [Cnts]     | 4519.5   | -95.1       | +95.1       |
| $\tau_3$ [ns]    | 1.0167   | -0.0205     | +0.0205     |
| $A_4$ [Cnts]     | 4093     | -234        | +234        |
| $\tau_4$ [ns]    | 0.2716   | -0.0186     | +0.0186     |
| Bkgr. Dec [Cnts] | 0.391    | -0.673      | +0.673      |
| Bkgr. IRF [Cnts] | -0.262   | -1.58       | +1.58       |
| Shift IRF [ns]   | -0.10763 | -0.00185    | +0.00185    |

Left: Time-resolved luminescence decay of **1C** in crystal including the instrument response function and the residuals ( $\lambda_{\text{exc}} = 376.7 \text{ nm}$ ). Right: Fitting parameters including pre-exponential factors and confidence limits.

|         | $\lambda_{\text{Exc}}$ (nm) | $\lambda_{\text{Em}}$ (nm) | $\tau$ (ns) | $\Phi$ ( $\lambda_{\text{exc}}=320\text{nm}$ ) |
|---------|-----------------------------|----------------------------|-------------|------------------------------------------------|
| aerated | 402                         | 503                        | 3,434       | 0,65                                           |
| 77K     | 434                         | 448                        | 2,191       |                                                |
| solid   | 479                         | 508                        | 1,186       | 0,03                                           |
| crystal | 473                         | 505                        | 2,246       | 0,16                                           |

Summary of photophysical data for **1C**. Intensity-weighted average lifetimes.

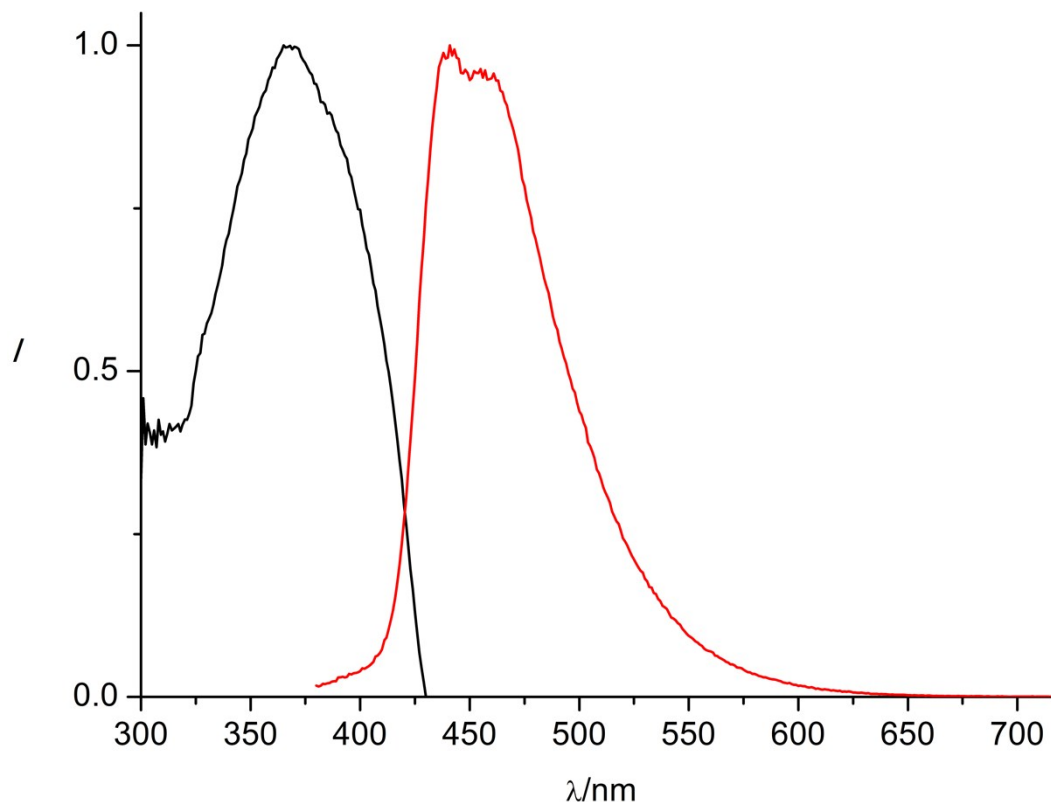

Excitation (black) and emission (red) spectra of **1E** in  $CH_2Cl_2$  ( $\lambda_{exc} = 320$  nm;  $\lambda_{em} = 460$  nm).

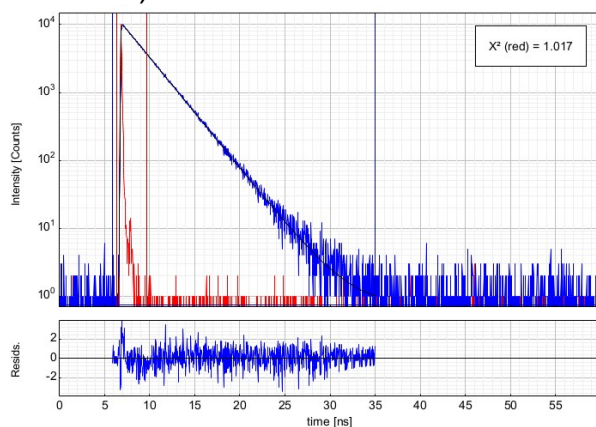

| Parameter        | Value   | Conf. Lower | Conf. Upper |
|------------------|---------|-------------|-------------|
| $A_1$ [Cnts]     | 10897.6 | -55.3       | +55.3       |
| $\tau_1$ [ns]    | 2.66501 | -0.00967    | +0.00967    |
| Bkgr. Dec [Cnts] | 0.733   | -0.495      | +0.495      |
| Bkgr. IRF [Cnts] | -0.097  | -1.10       | +1.10       |
| Shift IRF [ns]   | 0.19817 | -0.00225    | +0.00225    |

Left: Time-resolved luminescence decay of **1E** in  $CH_2Cl_2$  including the instrument response function and the residuals ( $\lambda_{exc} = 376.7$  nm). Right: Fitting parameters including pre-exponential factors and confidence limits.

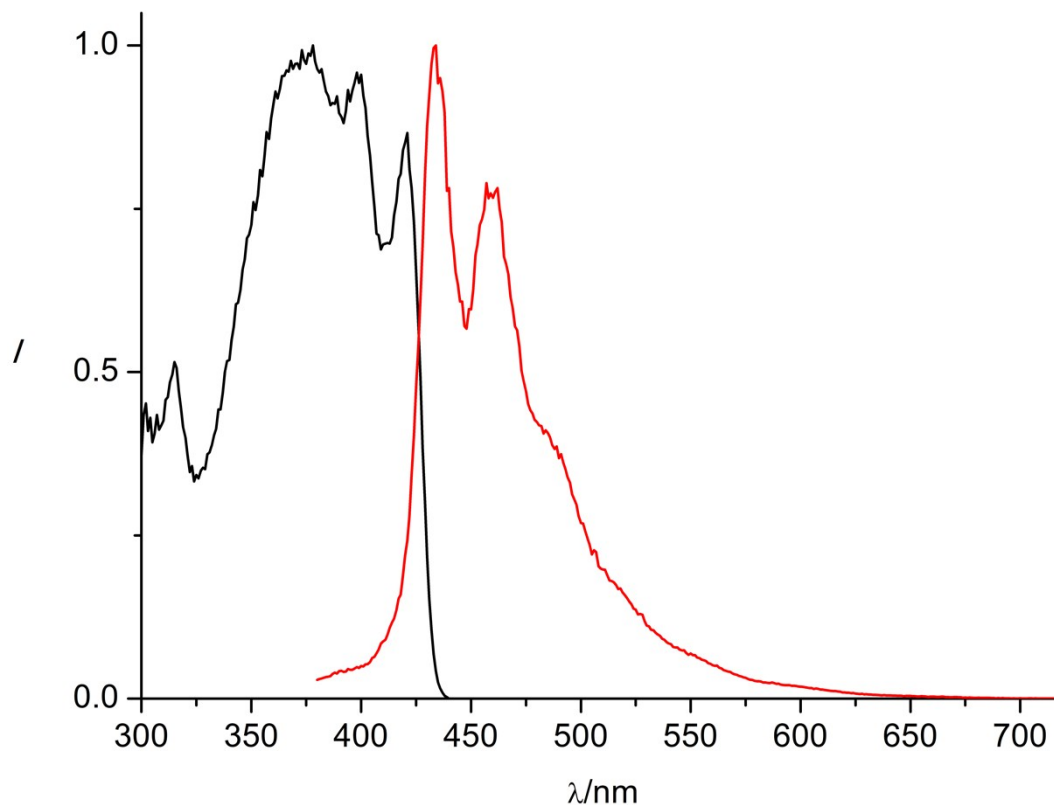

Excitation (black) and emission (red) spectra of **1E** in a frozen glassy matrix of  $CH_2Cl_2:MeOH$  (1:1) at 77 K ( $\lambda_{exc} = 320$  nm;  $\lambda_{em} = 460$  nm).

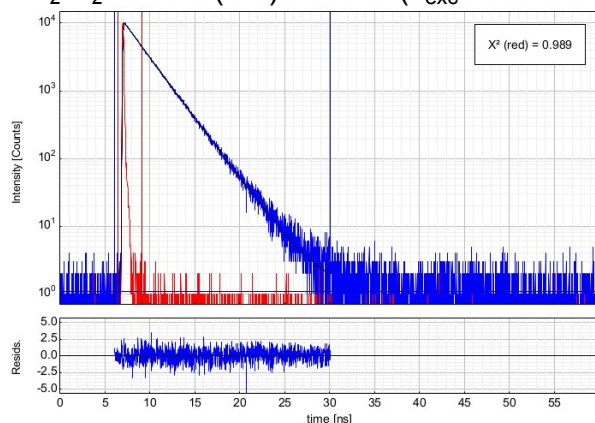

| Parameter         | Value   | Conf. Lower | Conf. Upper |
|-------------------|---------|-------------|-------------|
| $A_1$ [Cnts]      | 10195.9 | -50.8       | +50.8       |
| $\tau_1$ [ns]     | 2.45840 | -0.00863    | +0.00863    |
| $A_2$ [Cnts]      | 1004    | -104        | +104        |
| $\tau_2$ [ns]     | 0.979   | -0.112      | +0.112      |
| Bkgr. Dec. [Cnts] | 1.090   | -0.602      | +0.602      |
| Bkgr. IRF [Cnts]  | -0.316  | -1.17       | +1.17       |
| Shift IRF [ns]    | 0.36416 | -0.00169    | +0.00169    |

Left: Time-resolved luminescence decay of **1E** in a frozen glassy matrix  $CH_2Cl_2:MeOH$  (1:1) at 77K including the instrument response function and the residuals ( $\lambda_{exc} = 376.7$  nm). Right: Fitting parameters including pre-exponential factors and confidence limits.

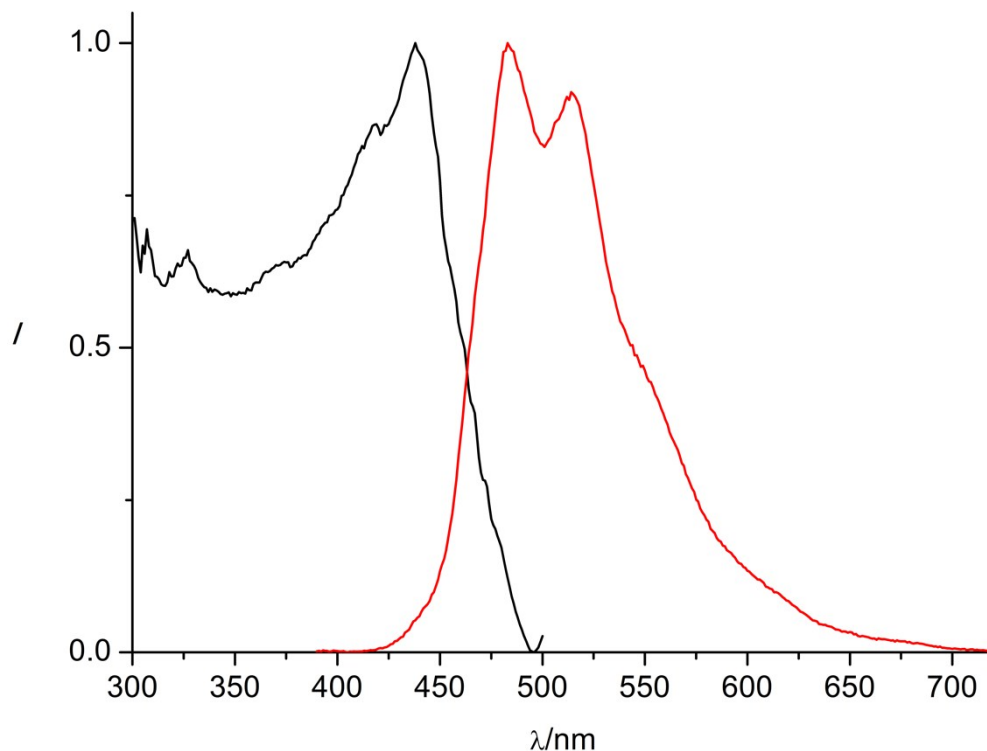

Excitation (black) and emission (red) spectra of **1E** in the solid state ( $\lambda_{\text{exc}} = 320$  nm;  $\lambda_{\text{em}} = 520$  nm).

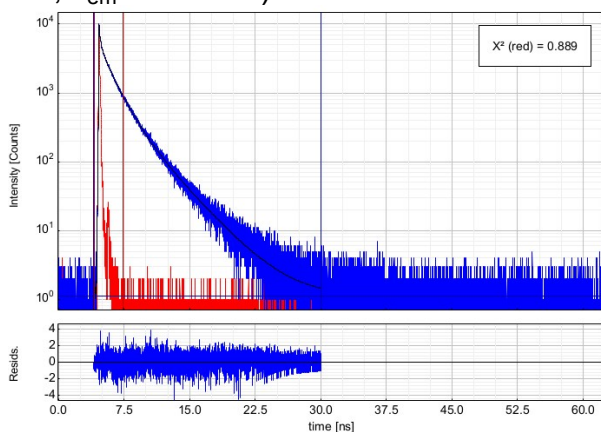

| Parameter                | Value    | Conf. Lower | Conf. Upper |
|--------------------------|----------|-------------|-------------|
| $A_1$ [Cnts]             | 3646.6   | -51.1       | +51.1       |
| $\tau_1$ [ns]            | 1.3768   | -0.0158     | +0.0158     |
| $A_2$ [Cnts]             | 2022     | -158        | +158        |
| $\tau_2$ [ns]            | 0.3327   | -0.0272     | +0.0272     |
| $A_3$ [Cnts]             | 281500   | -5590       | +5590       |
| $\tau_3$ [ns]            | 0.007317 | -0.000115   | +0.000115   |
| $A_4$ [Cnts]             | 921.1    | -19.6       | +19.6       |
| $\tau_4$ [ns]            | 3.1936   | -0.0390     | +0.0390     |
| Bkgr. Dec [Cnts]         | 1.122    | -0.446      | +0.446      |
| Bkgr. IRF [Cnts]         | 0.186    | -1.22       | +1.22       |
| Shift IRF [ns]           | -0.04343 | -0.00140    | +0.00140    |
| $A_{\text{Scat}}$ [Cnts] | -145110  | -7400       | +7400       |

Left: Time-resolved luminescence decay of **1E** in the solid state including the instrument response function and the residuals ( $\lambda_{\text{exc}} = 376.7$  nm). Right: Fitting parameters including pre-exponential factors and confidence limits.

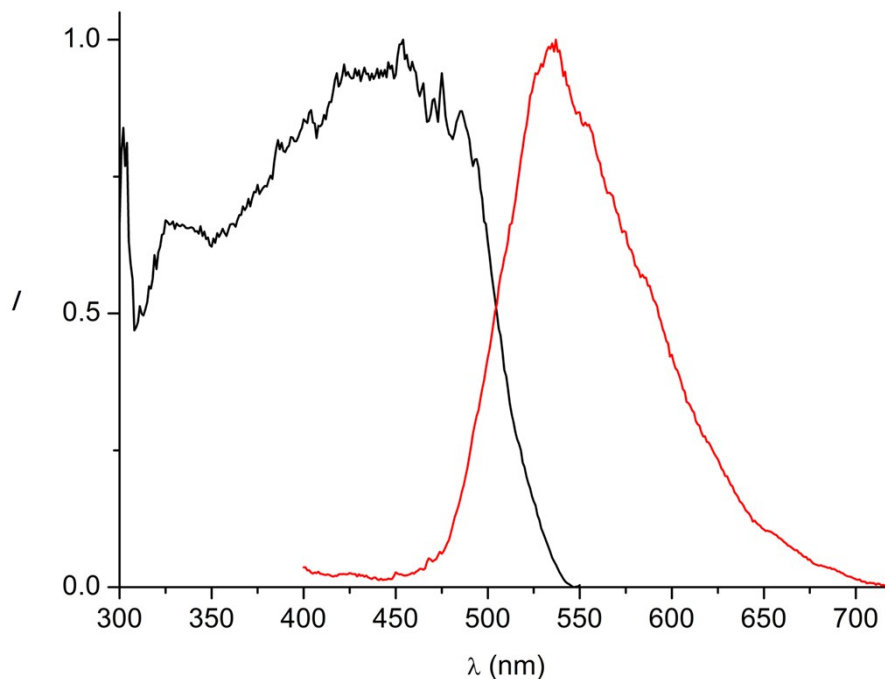

Excitation (black) and emission (red) spectra of **1E** in crystal ( $\lambda_{\text{exc}} = 320 \text{ nm}$ ;  $\lambda_{\text{em}} = 540 \text{ nm}$ ).

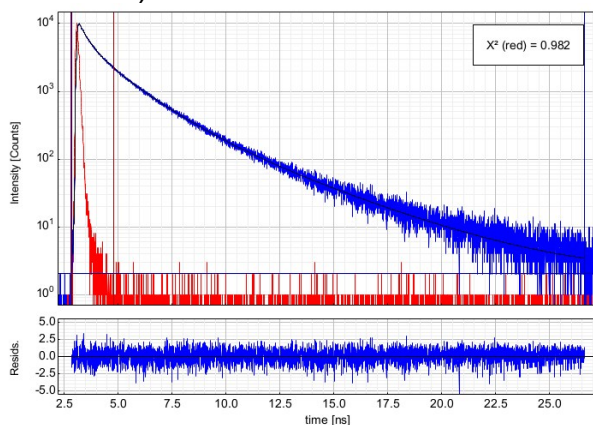

| Parameter        | Value    | Conf. Lower | Conf. Upper |
|------------------|----------|-------------|-------------|
| $A_1$ [Cnts]     | 838.6    | -19.0       | +19.0       |
| $\tau_1$ [ns]    | 3.6709   | -0.0457     | +0.0457     |
| $A_2$ [Cnts]     | 4489.2   | -54.0       | +54.0       |
| $\tau_2$ [ns]    | 1.5686   | -0.0146     | +0.0146     |
| $A_3$ [Cnts]     | 5457     | -150        | +150        |
| $\tau_3$ [ns]    | 0.4530   | -0.0130     | +0.0130     |
| $A_4$ [Cnts]     | 7740     | -618        | +618        |
| $\tau_4$ [ns]    | 0.06014  | -0.00561    | +0.00561    |
| Bkgr. Dec [Cnts] | 2.066    | -0.679      | +0.679      |
| Bkgr. IRF [Cnts] | -2.46    | -3.80       | +3.80       |
| Shift IRF [ns]   | -0.00667 | -0.00160    | +0.00160    |

Left: Time-resolved luminescence decay of **1E** in crystal including the instrument response function and the residuals ( $\lambda_{\text{exc}} = 376.7 \text{ nm}$ ). Right: Fitting parameters including pre-exponential factors and confidence limits.

|         | $\lambda_{\text{Exc}}$ (nm) | $\lambda_{\text{Em}}$ (nm) | $\tau$ (ns) | $\Phi$ ( $\lambda_{\text{exc}}=320\text{nm}$ ) |
|---------|-----------------------------|----------------------------|-------------|------------------------------------------------|
| aerated | 365                         | 441                        | 2,665       | 0,54                                           |
| 77K     | 378                         | 434                        | 2,403       |                                                |
| solid   | 438                         | 483                        | 1,547       | 0,11                                           |
| crystal | 454                         | 537                        | 1,799       | 0,13                                           |

Summary of photophysical data for **1E**. Intensity-weighted average lifetimes.



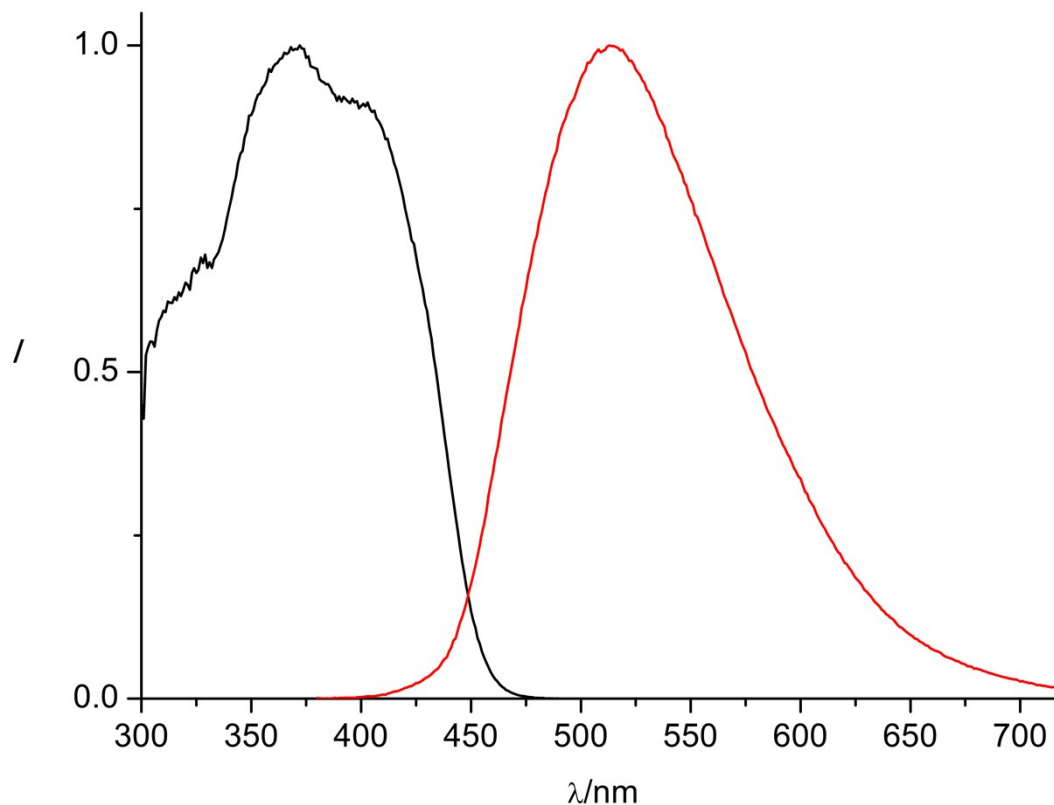

Excitation (black) and emission (red) spectra of **1F** in  $CH_2Cl_2$  ( $\lambda_{exc} = 370$  nm;  $\lambda_{em} = 510$  nm).

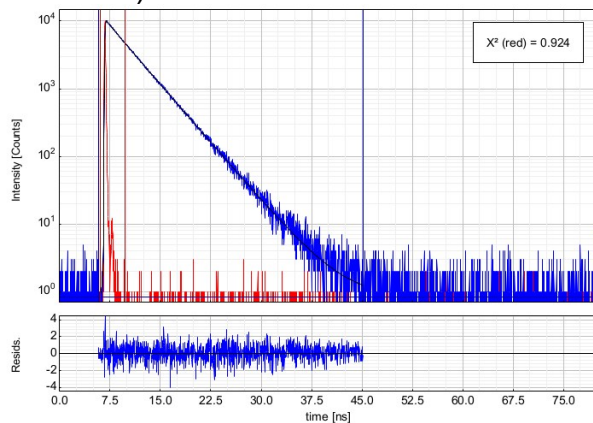

| Parameter        | Value   | Conf. Lower | Conf. Upper |
|------------------|---------|-------------|-------------|
| $A_1$ [Cnts]     | 10249.6 | -50.4       | +50.4       |
| $\tau_1$ [ns]    | 3.7965  | -0.0132     | +0.0132     |
| $A_2$ [Cnts]     | 718     | -105        | +105        |
| $\tau_2$ [ns]    | 1.471   | -0.240      | +0.240      |
| Bkgr. Dec [Cnts] | 0.833   | -0.508      | +0.508      |
| Bkgr. IRF [Cnts] | -0.278  | -0.968      | +0.968      |
| Shift IRF [ns]   | 0.16692 | -0.00246    | +0.00246    |

Left: Time-resolved luminescence decay of **1F** in  $CH_2Cl_2$  including the instrument response function and the residuals ( $\lambda_{exc} = 376.7$  nm). Right: Fitting parameters including pre-exponential factors and confidence limits.



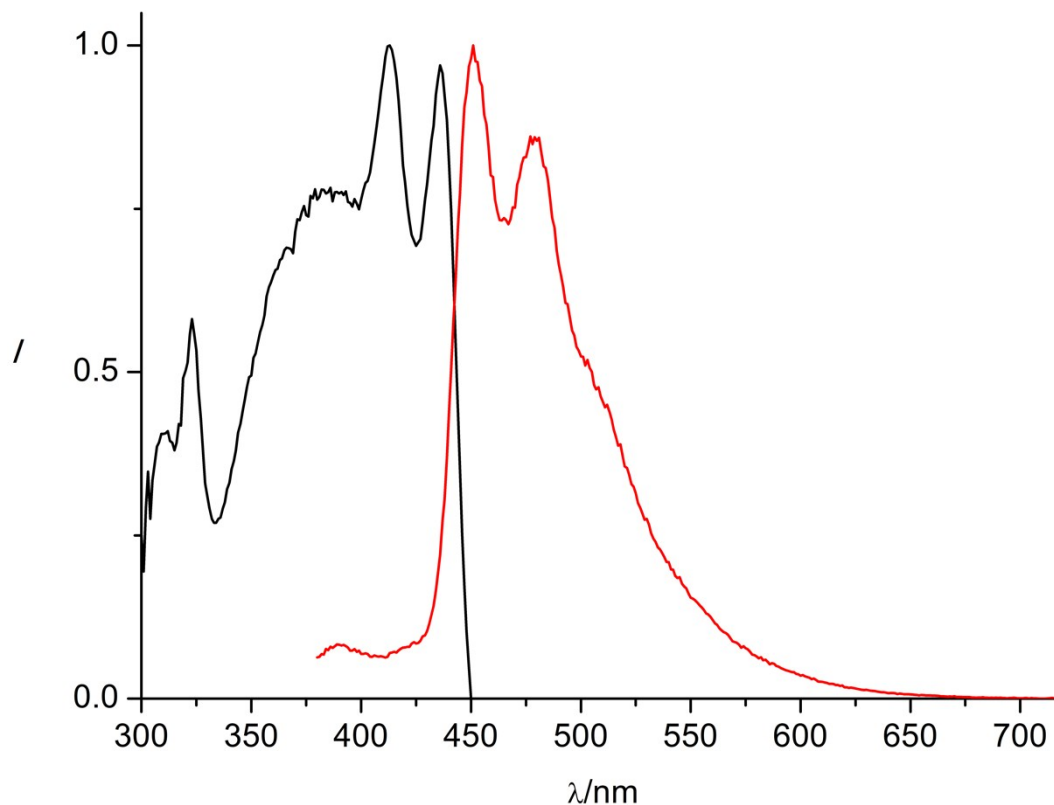

Excitation (black) and emission (red) spectra of **1F** in a frozen glassy matrix of  $\text{CH}_2\text{Cl}_2:\text{MeOH}$  (1:1) at 77 K ( $\lambda_{\text{exc}} = 320$  nm;  $\lambda_{\text{em}} = 480$  nm).

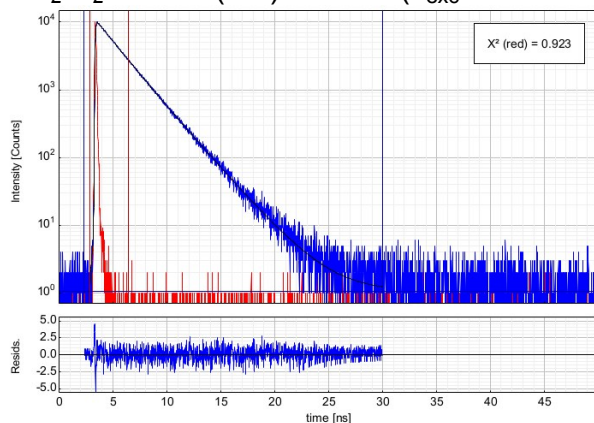

| Parameter        | Value   | Conf. Lower | Conf. Upper |
|------------------|---------|-------------|-------------|
| $A_1$ [Cnts]     | 6408.4  | -49.4       | +49.4       |
| $\tau_1$ [ns]    | 2.5186  | -0.0128     | +0.0128     |
| $A_2$ [Cnts]     | 4666.3  | -68.6       | +68.6       |
| $\tau_2$ [ns]    | 1.7852  | -0.0224     | +0.0224     |
| Bkgr. Dec [Cnts] | 1.063   | -0.451      | +0.451      |
| Bkgr. IRF [Cnts] | -1.66   | -1.25       | +1.25       |
| Shift IRF [ns]   | 0.11495 | -0.00200    | +0.00200    |

Left: Time-resolved luminescence decay of **1F** in a frozen glassy matrix  $\text{CH}_2\text{Cl}_2:\text{MeOH}$  (1:1) at 77K including the instrument response function and the residuals ( $\lambda_{\text{exc}} = 376.7$  nm). Right: Fitting parameters including pre-exponential factors and confidence limits.

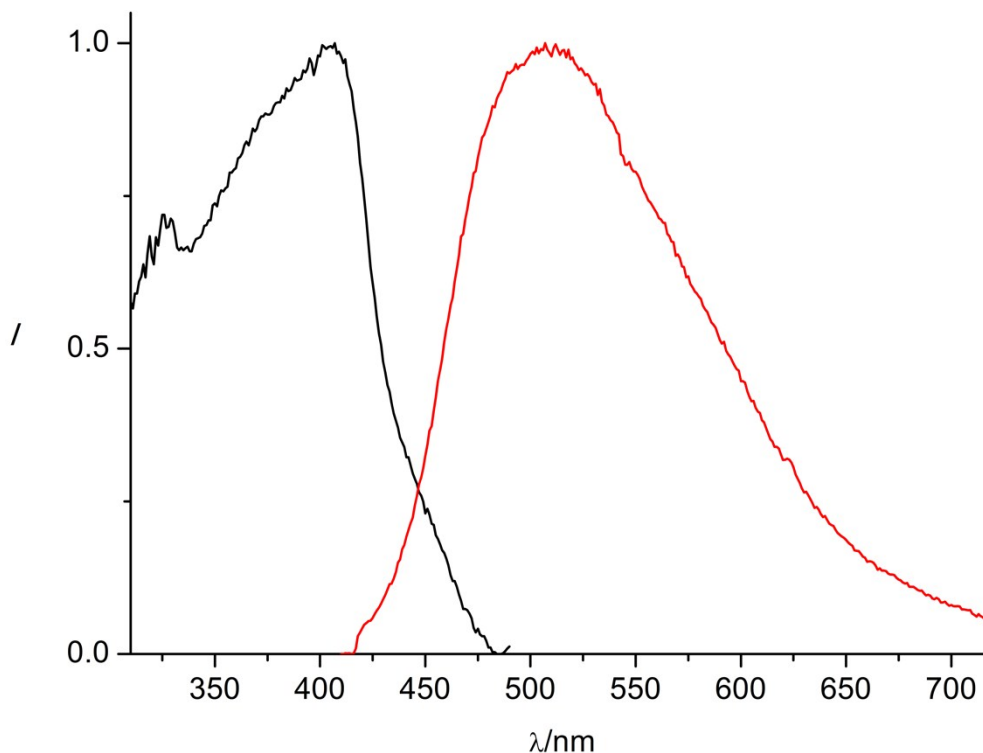

Excitation (black) and emission (red) spectra of **1F** in the solid state ( $\lambda_{\text{exc}} = 370$  nm;  $\lambda_{\text{em}} = 510$  nm).

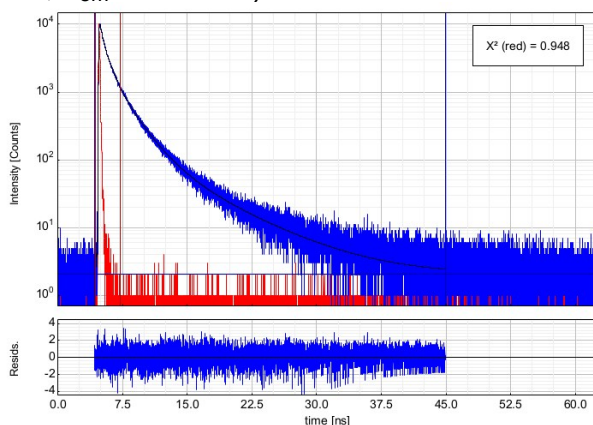

| Parameter                | Value   | Conf. Lower | Conf. Upper |
|--------------------------|---------|-------------|-------------|
| A <sub>1</sub> [Cnts]    | 2648.3  | -49.1       | +49.1       |
| τ <sub>1</sub> [ns]      | 2.0530  | -0.0259     | +0.0259     |
| A <sub>2</sub> [Cnts]    | 5573    | -130        | +130        |
| τ <sub>2</sub> [ns]      | 0.7464  | -0.0160     | +0.0160     |
| A <sub>3</sub> [Cnts]    | 4891    | -347        | +347        |
| τ <sub>3</sub> [ns]      | 0.1992  | -0.0158     | +0.0158     |
| A <sub>4</sub> [Cnts]    | 208.9   | -10.0       | +10.0       |
| τ <sub>4</sub> [ns]      | 6.408   | -0.166      | +0.166      |
| Bkgr. Dec [Cnts]         | 2.038   | -0.485      | +0.485      |
| Bkgr. IRF [Cnts]         | -0.444  | -2.34       | +2.34       |
| Shift IRF [ns]           | 0.00884 | -0.00198    | +0.00198    |
| A <sub>Scat</sub> [Cnts] | 75870   | -8510       | +8510       |

Left: Time-resolved luminescence decay of **1F** in the solid state including the instrument response function and the residuals ( $\lambda_{\text{exc}} = 376.7$  nm). Right: Fitting parameters including pre-exponential factors and confidence limits.

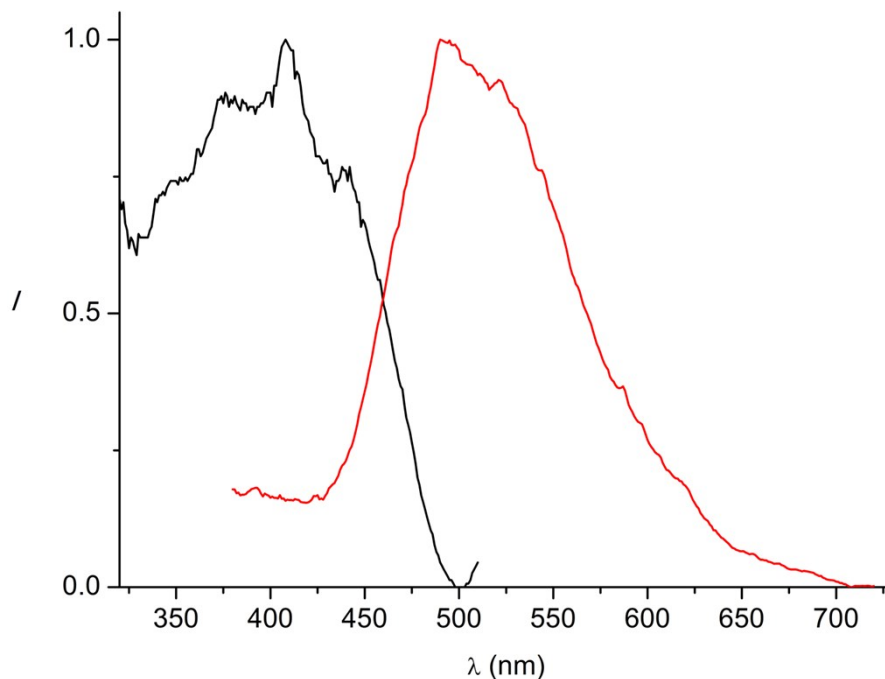

Excitation (black) and emission (red) spectra of **1F** in crystal ( $\lambda_{\text{exc}} = 320 \text{ nm}$ ;  $\lambda_{\text{em}} = 540 \text{ nm}$ ).

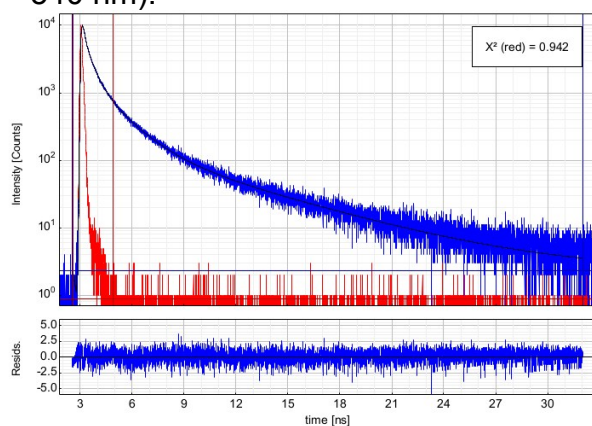

| Parameter         | Value   | Conf. Lower | Conf. Upper |
|-------------------|---------|-------------|-------------|
| $A_1$ [Cnts]      | 1891.7  | -44.8       | +44.8       |
| $\tau_1$ [ns]     | 1.4130  | -0.0238     | +0.0238     |
| $A_2$ [Cnts]      | 6388    | -152        | +152        |
| $\tau_2$ [ns]     | 0.41177 | -0.00877    | +0.00877    |
| $A_3$ [Cnts]      | 213.98  | -7.66       | +7.66       |
| $\tau_3$ [ns]     | 5.644   | -0.123      | +0.123      |
| $A_4$ [Cnts]      | 12222   | -552        | +552        |
| $\tau_4$ [ns]     | 0.07898 | -0.00397    | +0.00397    |
| Bkgr. Dec [Cnts]  | 2.291   | -0.578      | +0.578      |
| Bkgr. IREF [Cnts] | 0.87    | -1.70       | +1.70       |
| Shift IREF [ns]   | 0.03433 | -0.00160    | +0.00160    |

Left: Time-resolved luminescence decay of **1F** in crystal including the instrument response function and the residuals ( $\lambda_{\text{exc}} = 376.7 \text{ nm}$ ). Right: Fitting parameters including pre-exponential factors and confidence limits.

|         | $\lambda_{\text{Exc}}$ (nm) | $\lambda_{\text{Em}}$ (nm) | $\tau$ (ns) | $\Phi$ ( $\lambda_{\text{exc}}=320\text{nm}$ ) |
|---------|-----------------------------|----------------------------|-------------|------------------------------------------------|
| aerated | 372                         | 513                        | 3,735       | 0,57                                           |
| 77K     | 413                         | 451                        | 2,269       |                                                |
| solid   | 407                         | 507                        | 1,935       | 0,05                                           |
| crystal | 408                         | 490                        | 1,572       | 0,05                                           |

Summary of photophysical data for **1F**. Amplitude-weighted average lifetimes.

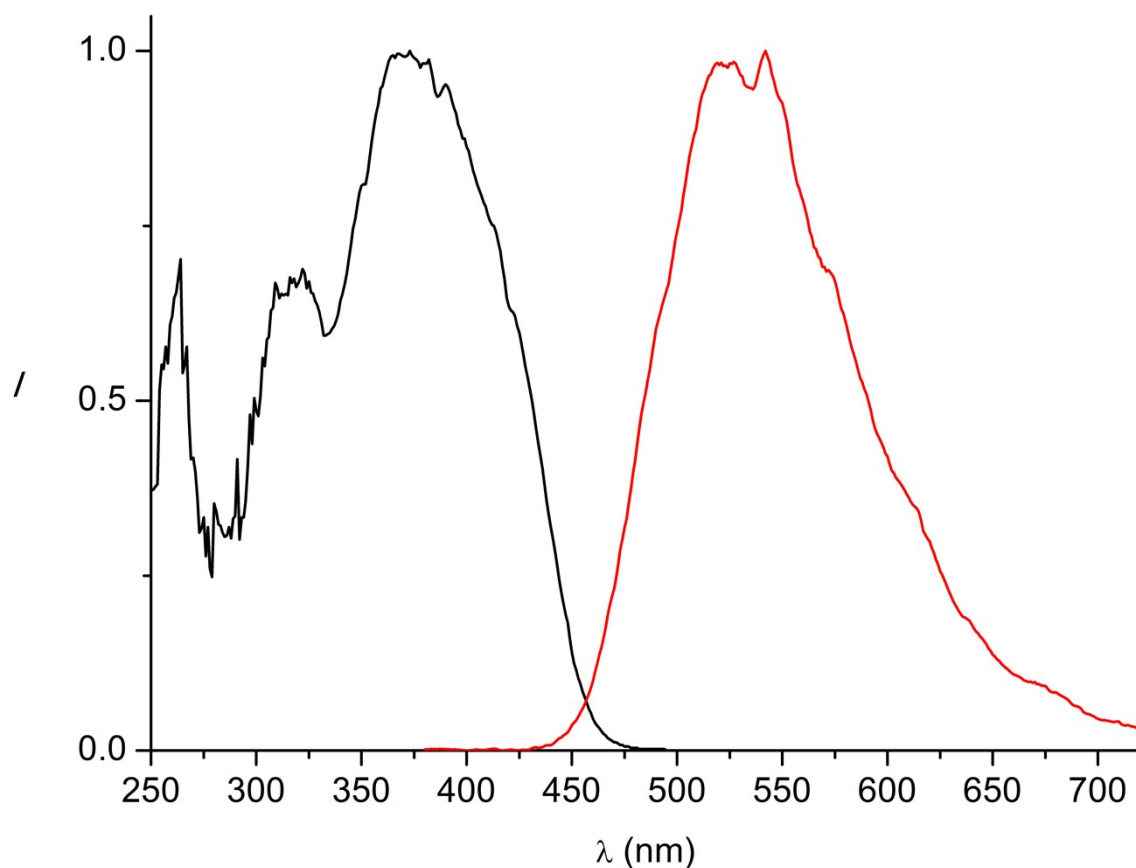

Excitation (black) and emission (red) spectra of **1g** in  $CH_2Cl_2$  ( $\lambda_{exc} = 320$  nm;  $\lambda_{em} = 540$  nm).

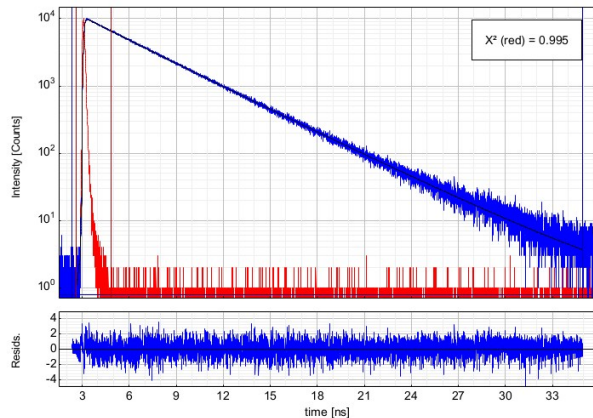

| Parameter        | Value    | Conf. Lower | Conf. Upper |
|------------------|----------|-------------|-------------|
| $A_1$ [Cnts]     | 6141.1   | -43.5       | +43.5       |
| $\tau_1$ [ns]    | 4.1146   | -0.0199     | +0.0199     |
| $A_2$ [Cnts]     | 4443.8   | -55.4       | +55.4       |
| $\tau_2$ [ns]    | 3.2004   | -0.0325     | +0.0325     |
| Bkgr. Dec [Cnts] | 0.796    | -0.815      | +0.815      |
| Bkgr. IRF [Cnts] | -0.459   | -1.69       | +1.69       |
| Shift IRF [ns]   | -0.05648 | -0.00208    | +0.00208    |

Left: Time-resolved luminescence decay of **1g** in  $CH_2Cl_2$  including the instrument response function and the residuals ( $\lambda_{exc} = 376.7$  nm). Right: Fitting parameters including pre-exponential factors and confidence limits.

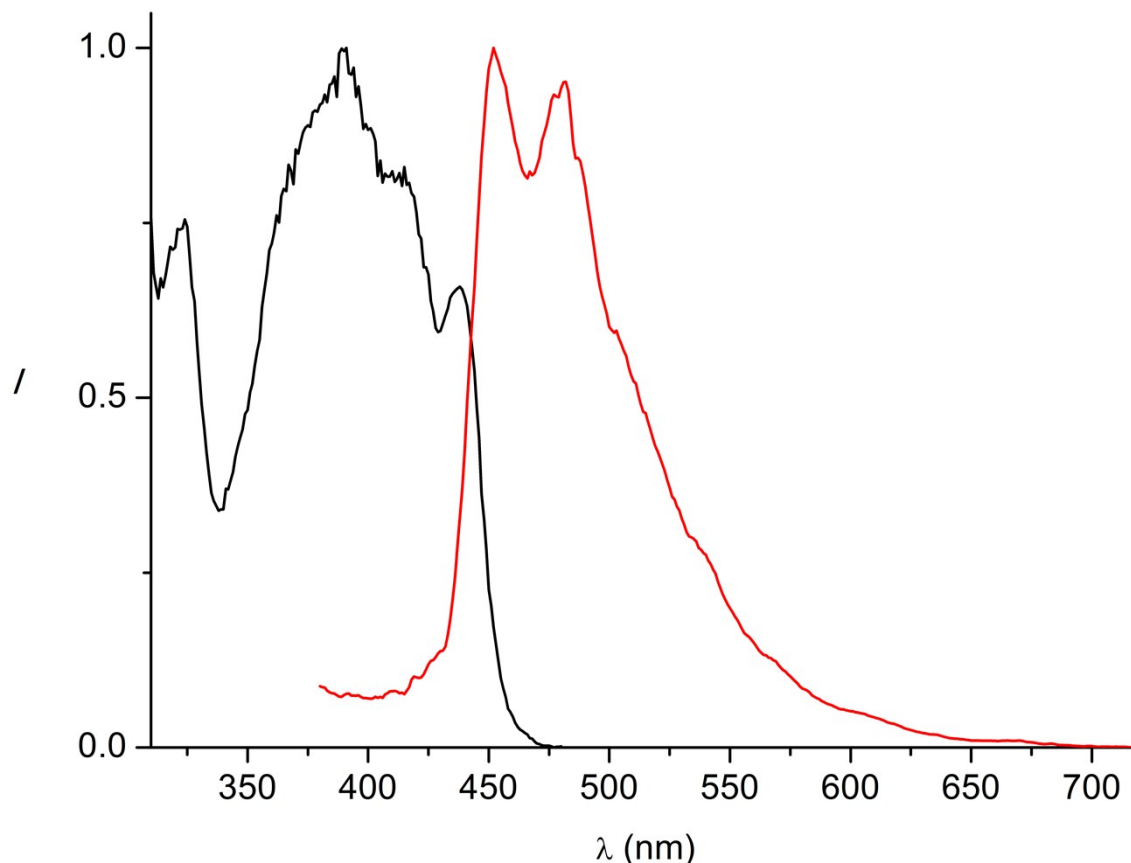

Excitation (black) and emission (red) spectra of **1g** in a frozen glassy matrix of  $CH_2Cl_2:MeOH$  (1:1) at 77 K ( $\lambda_{exc} = 320$  nm;  $\lambda_{em} = 520$  nm).

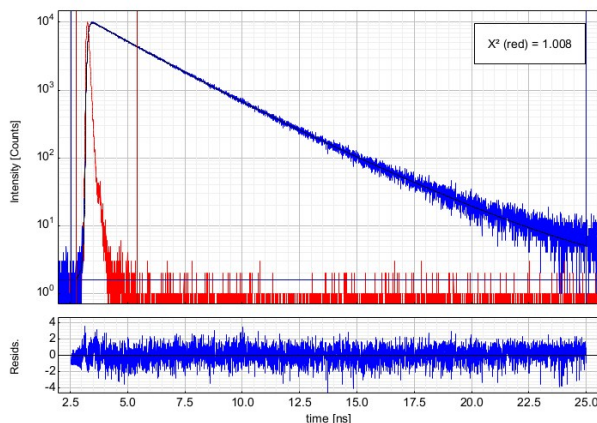

| Parameter        | Value   | Conf. Lower | Conf. Upper |
|------------------|---------|-------------|-------------|
| $A_1$ [Cnts]     | 2853.0  | -37.0       | +37.0       |
| $\tau_1$ [ns]    | 3.1976  | -0.0242     | +0.0242     |
| $A_2$ [Cnts]     | 8228.7  | -58.1       | +58.1       |
| $\tau_2$ [ns]    | 2.0793  | -0.0119     | +0.0119     |
| Bkgr. Dec [Cnts] | 1.578   | -0.843      | +0.843      |
| Bkgr. IRF [Cnts] | -0.195  | -0.786      | +0.786      |
| Shift IRF [ns]   | 0.03155 | -0.00170    | +0.00170    |

Left: Time-resolved luminescence decay of **1g** in a frozen glassy matrix  $CH_2Cl_2:MeOH$  (1:1) at 77K including the instrument response function and the residuals ( $\lambda_{exc} = 376.7$  nm). Right: Fitting parameters including pre-exponential factors and confidence limits.

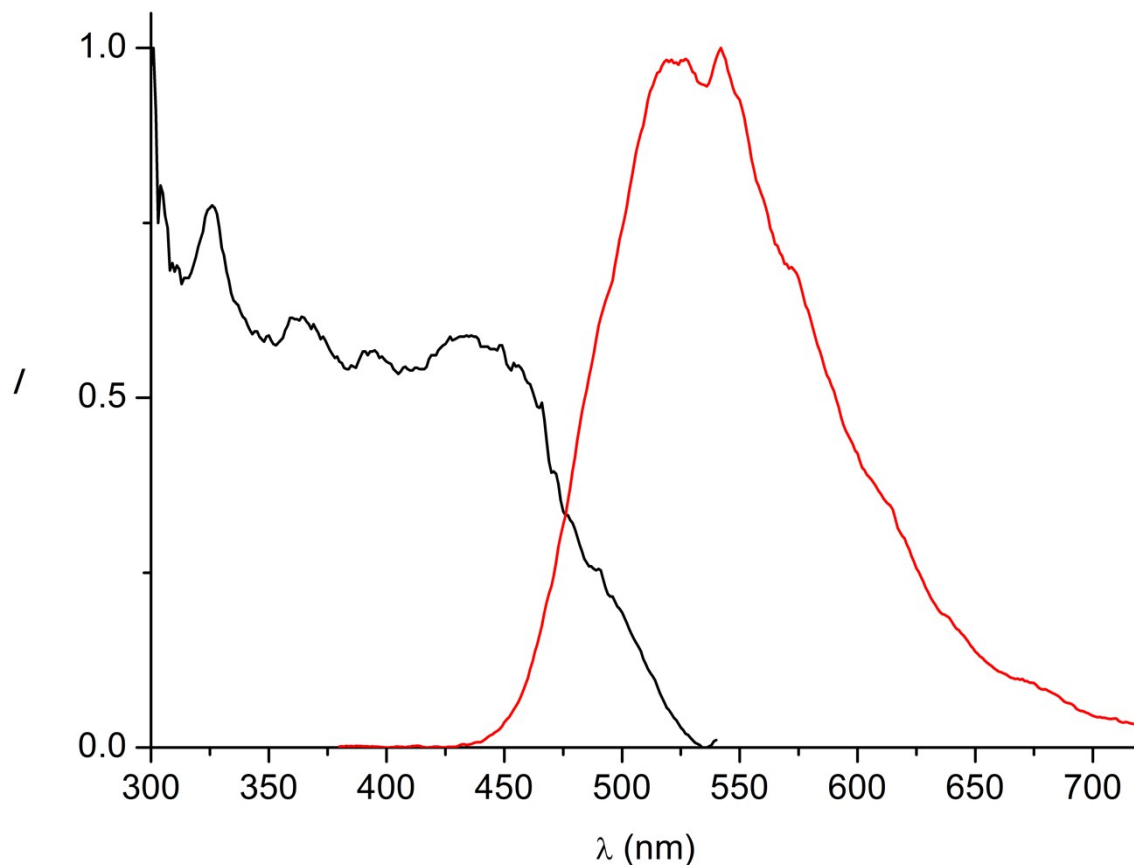

Excitation (black) and emission (red) spectra of **1g** in the solid state ( $\lambda_{\text{exc}} = 320$  nm;  $\lambda_{\text{em}} = 570$  nm).

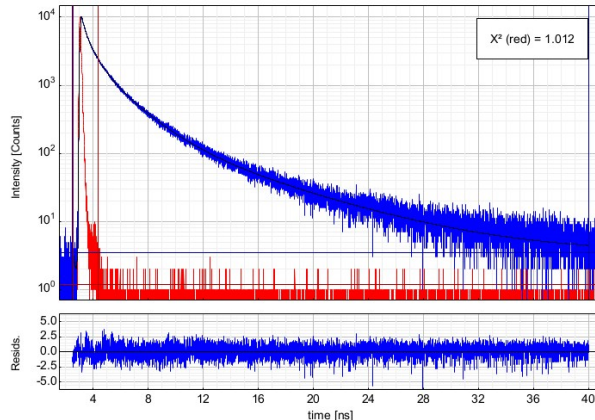

| Parameter         | Value   | Conf. Lower | Conf. Upper |
|-------------------|---------|-------------|-------------|
| $A_1$ [Cnts]      | 304.2   | -11.0       | +11.0       |
| $\tau_1$ [ns]     | 6.455   | -0.139      | +0.139      |
| $A_2$ [Cnts]      | 2670.9  | -49.1       | +49.1       |
| $\tau_2$ [ns]     | 2.0342  | -0.0271     | +0.0271     |
| $A_3$ [Cnts]      | 5702    | -142        | +142        |
| $\tau_3$ [ns]     | 0.6434  | -0.0152     | +0.0152     |
| $A_4$ [Cnts]      | 7740    | -456        | +456        |
| $\tau_4$ [ns]     | 0.12783 | -0.00876    | +0.00876    |
| Bkgr. Dec [Cnts]  | 3.449   | -0.642      | +0.642      |
| Bkgr. IRRF [Cnts] | 1.17    | -1.85       | +1.85       |
| Shift IRRF [ns]   | 0.03486 | -0.00195    | +0.00195    |

Left: Time-resolved luminescence decay of **1g** in the solid state including the instrument response function and the residuals ( $\lambda_{\text{exc}} = 376.7$  nm). Right: Fitting parameters including pre-exponential factors and confidence limits.

|  | $\lambda_{\text{Exc}}$ (nm) | $\lambda_{\text{Em}}$ (nm) | $\tau$ (ns) | $\Phi$ ( $\lambda_{\text{exc}}=320\text{nm}$ ) |
|--|-----------------------------|----------------------------|-------------|------------------------------------------------|
|--|-----------------------------|----------------------------|-------------|------------------------------------------------|

|         |     |     |       |      |
|---------|-----|-----|-------|------|
| aerated | 373 | 542 | 3,785 | 0,82 |
| 77K     | 391 | 452 | 2,468 |      |
| solid   | 301 | 542 | 2,175 | 0,01 |

Summary of photophysical data for **1g**. Amplitude-weighted average lifetimes.

**Figure S4.** Expansion of a collection of  $^1\text{H}$  NMR spectra for compound **1a** in  $\text{CDCl}_3$  at 298K. There is not any chemical shift variation in any type of proton when concentration increases.

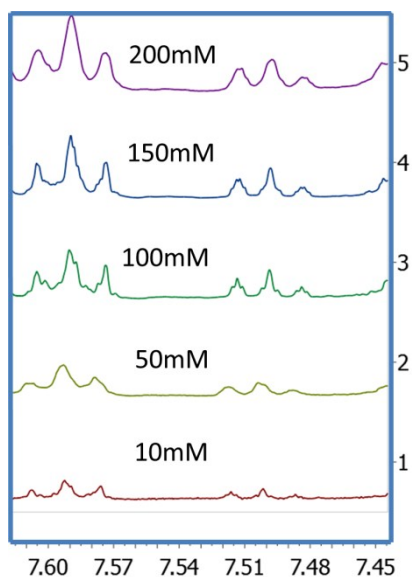

### Figure S5. SEM Images

**Figure S5a.** SEM images of supramolecular structures formed by the self-assembly of benzotriazol **1a**. The samples were prepared by slow diffusion of hexane vapor into dilute chloroform solutions of **1a**.

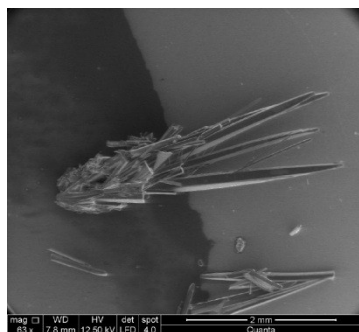

**Figure S5b.** SEM images of supramolecular structures formed by the self-assembly of benzotriazol **1e**. The samples were prepared by slow diffusion of hexane vapor into dilute tetrahydrofuran solutions of **1e**.



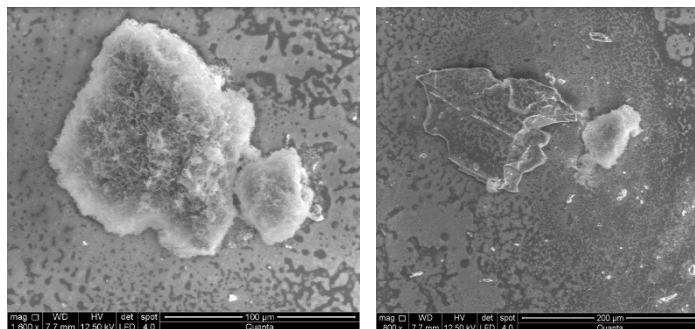

**Figure S5c.** SEM images of supramolecular structures formed by the self-assembly of benzotriazol **1g**. The samples were prepared by slow diffusion of methanol vapor into dilute chloroform solutions of **1g**.

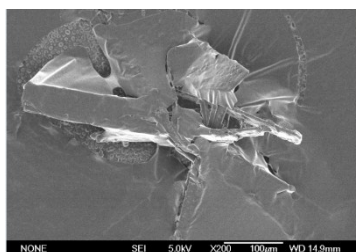

## Theoretical dates

### Z-Matrix of the different compounds **1a**, **1c**, **1e**, **1f** and **1g**.

#### **1a**

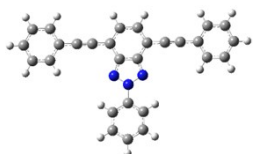

| Center Number | Atomic Number | Atomic Type | Coordinates (Angstroms) |           |           |
|---------------|---------------|-------------|-------------------------|-----------|-----------|
|               |               |             | X                       | Y         | Z         |
| 1             | 6             | 0           | -0.712430               | -0.250136 | -0.000037 |
| 2             | 6             | 0           | 0.712435                | -0.250105 | -0.000051 |
| 3             | 6             | 0           | 1.464184                | -1.464713 | -0.000068 |
| 4             | 6             | 0           | 0.705875                | -2.636946 | -0.000108 |
| 5             | 6             | 0           | -0.705770               | -2.636976 | -0.000096 |
| 6             | 6             | 0           | -1.464128               | -1.464776 | -0.000046 |
| 7             | 7             | 0           | 1.138403                | 1.025920  | -0.000037 |
| 8             | 7             | 0           | -1.138449               | 1.025871  | -0.000028 |
| 9             | 7             | 0           | -0.000038               | 1.721838  | -0.000026 |
| 10            | 6             | 0           | -0.000066               | 3.147356  | -0.000009 |
| 11            | 6             | 0           | -1.217851               | 3.833414  | 0.000129  |
| 12            | 6             | 0           | 1.217695                | 3.833461  | -0.000141 |
| 13            | 6             | 0           | -1.207740               | 5.226585  | 0.000131  |
| 14            | 1             | 0           | -2.145109               | 3.273878  | 0.000223  |
| 15            | 6             | 0           | 1.207531                | 5.226631  | -0.000128 |
| 16            | 1             | 0           | 2.144974                | 3.273960  | -0.000249 |



|    |   |   |           |           |           |
|----|---|---|-----------|-----------|-----------|
| 17 | 6 | 0 | -0.000118 | 5.928079  | 0.000007  |
| 18 | 1 | 0 | -2.151442 | 5.764563  | 0.000234  |
| 19 | 1 | 0 | 2.151212  | 5.764646  | -0.000231 |
| 20 | 6 | 0 | -2.879045 | -1.471733 | -0.000029 |
| 21 | 6 | 0 | -4.096348 | -1.477294 | -0.000015 |
| 22 | 6 | 0 | 2.879103  | -1.471609 | -0.000054 |
| 23 | 6 | 0 | 4.096406  | -1.477143 | -0.000039 |
| 24 | 6 | 0 | -5.519139 | -1.471663 | 0.000014  |
| 25 | 6 | 0 | -6.227896 | -0.252529 | 0.000023  |
| 26 | 6 | 0 | -6.243690 | -2.681191 | 0.000031  |
| 27 | 6 | 0 | -7.619568 | -0.249043 | 0.000049  |
| 28 | 1 | 0 | -5.672029 | 0.679879  | 0.000010  |
| 29 | 6 | 0 | -7.635402 | -2.667045 | 0.000054  |
| 30 | 1 | 0 | -5.701817 | -3.621961 | 0.000022  |
| 31 | 6 | 0 | -8.328207 | -1.453531 | 0.000065  |
| 32 | 1 | 0 | -8.154408 | 0.696900  | 0.000056  |
| 33 | 1 | 0 | -8.182268 | -3.606072 | 0.000064  |
| 34 | 6 | 0 | 5.519200  | -1.471555 | 0.000010  |
| 35 | 6 | 0 | 6.227993  | -0.252444 | 0.000054  |
| 36 | 6 | 0 | 6.243718  | -2.681106 | 0.000026  |
| 37 | 6 | 0 | 7.619668  | -0.248998 | 0.000100  |
| 38 | 1 | 0 | 5.672157  | 0.679983  | 0.000049  |
| 39 | 6 | 0 | 7.635428  | -2.667001 | 0.000069  |
| 40 | 1 | 0 | 5.701815  | -3.621860 | -0.000001 |
| 41 | 6 | 0 | 8.328270  | -1.453505 | 0.000106  |
| 42 | 1 | 0 | 8.154531  | 0.696931  | 0.000131  |
| 43 | 1 | 0 | 8.182270  | -3.606042 | 0.000075  |
| 44 | 1 | 0 | -1.226417 | -3.589231 | -0.000129 |
| 45 | 1 | 0 | 1.226561  | -3.589180 | -0.000144 |
| 46 | 1 | 0 | 9.414791  | -1.446520 | 0.000143  |
| 47 | 1 | 0 | -9.414727 | -1.446510 | 0.000083  |
| 48 | 1 | 0 | -0.000138 | 7.014328  | 0.000010  |

1c

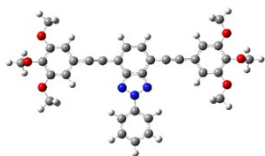

| Center<br>Number | Atomic<br>Number | Atomic<br>Type | Coordinates (Angstroms) |           |           |
|------------------|------------------|----------------|-------------------------|-----------|-----------|
|                  |                  |                | X                       | Y         | Z         |
| 1                | 6                | 0              | 0.712618                | 0.216582  | -0.077629 |
| 2                | 6                | 0              | -0.712614               | 0.216582  | -0.077629 |
| 3                | 6                | 0              | -1.465421               | -0.997820 | -0.092637 |
| 4                | 6                | 0              | -0.705717               | -2.169365 | -0.107409 |
| 5                | 6                | 0              | 0.705719                | -2.169365 | -0.107410 |
| 6                | 6                | 0              | 1.465424                | -0.997820 | -0.092638 |
| 7                | 7                | 0              | -1.138542               | 1.492472  | -0.061398 |
| 8                | 7                | 0              | 1.138546                | 1.492472  | -0.061398 |
| 9                | 7                | 0              | 0.000002                | 2.188661  | -0.052684 |
| 10               | 6                | 0              | 0.000002                | 3.613581  | -0.034819 |
| 11               | 6                | 0              | 1.217511                | 4.300146  | -0.026318 |
| 12               | 6                | 0              | -1.217508               | 4.300146  | -0.026339 |
| 13               | 6                | 0              | 1.207454                | 5.693215  | -0.008839 |
| 14               | 1                | 0              | 2.144488                | 3.740224  | -0.033668 |
| 15               | 6                | 0              | -1.207450               | 5.693215  | -0.008859 |
| 16               | 1                | 0              | -2.144484               | 3.740224  | -0.033705 |
| 17               | 6                | 0              | 0.000002                | 6.394892  | -0.000023 |
| 18               | 1                | 0              | 2.151100                | 6.231340  | -0.002330 |
| 19               | 1                | 0              | -2.151097               | 6.231340  | -0.002366 |
| 20               | 6                | 0              | 2.879820                | -1.005195 | -0.091755 |
| 21               | 6                | 0              | 4.097473                | -1.012489 | -0.090866 |

|    |   |   |            |           |           |
|----|---|---|------------|-----------|-----------|
| 22 | 6 | 0 | -2.879816  | -1.005193 | -0.091751 |
| 23 | 6 | 0 | -4.097470  | -1.012484 | -0.090860 |
| 24 | 6 | 0 | 5.519796   | -1.009574 | -0.087072 |
| 25 | 6 | 0 | 6.214084   | 0.214653  | -0.074344 |
| 26 | 6 | 0 | 6.225626   | -2.227222 | -0.093118 |
| 27 | 6 | 0 | 7.610771   | 0.217435  | -0.069047 |
| 28 | 1 | 0 | 5.647317   | 1.136580  | -0.065339 |
| 29 | 6 | 0 | 7.622391   | -2.217248 | -0.087556 |
| 30 | 1 | 0 | 5.669523   | -3.155715 | -0.098072 |
| 31 | 6 | 0 | 8.323451   | -0.996513 | -0.087489 |
| 32 | 6 | 0 | -5.519792  | -1.009563 | -0.087061 |
| 33 | 6 | 0 | -6.214078  | 0.214662  | -0.074211 |
| 34 | 6 | 0 | -6.225634  | -2.227204 | -0.093231 |
| 35 | 6 | 0 | -7.610765  | 0.217456  | -0.068906 |
| 36 | 1 | 0 | -5.647307  | 1.136586  | -0.065126 |
| 37 | 6 | 0 | -7.622397  | -2.217223 | -0.087658 |
| 38 | 1 | 0 | -5.669539  | -3.155701 | -0.098291 |
| 39 | 6 | 0 | -8.323462  | -0.996485 | -0.087435 |
| 40 | 1 | 0 | 1.225979   | -3.121820 | -0.119569 |
| 41 | 1 | 0 | -1.225977  | -3.121819 | -0.119566 |
| 42 | 1 | 0 | 0.000002   | 7.481048  | 0.013424  |
| 43 | 8 | 0 | 8.404571   | -3.333367 | -0.080373 |
| 44 | 8 | 0 | 9.690676   | -0.990103 | -0.157840 |
| 45 | 8 | 0 | 8.382365   | 1.340617  | -0.045085 |
| 46 | 8 | 0 | -8.404575  | -3.333348 | -0.080619 |
| 47 | 8 | 0 | -9.690681  | -0.990070 | -0.157795 |
| 48 | 8 | 0 | -8.382334  | 1.340656  | -0.044864 |
| 49 | 6 | 0 | 10.353118  | -0.987782 | 1.108097  |
| 50 | 1 | 0 | 10.103414  | -1.886576 | 1.685311  |
| 51 | 1 | 0 | 11.423937  | -0.982573 | 0.891220  |
| 52 | 1 | 0 | 10.094882  | -0.092355 | 1.686661  |
| 53 | 6 | 0 | 7.762969   | -4.598286 | -0.116467 |
| 54 | 1 | 0 | 7.127758   | -4.756025 | 0.765333  |
| 55 | 1 | 0 | 7.156127   | -4.716411 | -1.023602 |
| 56 | 1 | 0 | 8.565449   | -5.338133 | -0.120221 |
| 57 | 6 | 0 | 7.728011   | 2.599606  | -0.062074 |
| 58 | 1 | 0 | 7.119650   | 2.724823  | -0.967159 |
| 59 | 1 | 0 | 7.091498   | 2.737351  | 0.822056  |
| 60 | 1 | 0 | 8.523177   | 3.347311  | -0.054913 |
| 61 | 6 | 0 | -7.762970  | -4.598260 | -0.116873 |
| 62 | 1 | 0 | -7.156128  | -4.716268 | -1.024022 |
| 63 | 1 | 0 | -7.127759  | -4.756110 | 0.764907  |
| 64 | 1 | 0 | -8.565448  | -5.338109 | -0.120721 |
| 65 | 6 | 0 | -10.353203 | -0.987899 | 1.108105  |
| 66 | 1 | 0 | -10.095026 | -0.092522 | 1.686767  |
| 67 | 1 | 0 | -11.424006 | -0.982702 | 0.891151  |
| 68 | 1 | 0 | -10.103504 | -1.886745 | 1.685234  |
| 69 | 6 | 0 | -7.727957  | 2.599633  | -0.061776 |
| 70 | 1 | 0 | -7.091437  | 2.737311  | 0.822359  |
| 71 | 1 | 0 | -7.119599  | 2.724898  | -0.966857 |
| 72 | 1 | 0 | -8.523110  | 3.347352  | -0.054563 |

1e

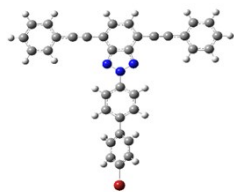

| Center Number | Atomic Number | Atomic Type | Coordinates (Angstroms) |           |           |
|---------------|---------------|-------------|-------------------------|-----------|-----------|
|               |               |             | X                       | Y         | Z         |
| 1             | 6             | 0           | -3.008449               | 0.712634  | -0.002872 |
| 2             | 6             | 0           | -3.008438               | -0.712679 | 0.002874  |

|    |    |   |           |           |           |
|----|----|---|-----------|-----------|-----------|
| 3  | 6  | 0 | -4.223138 | -1.464478 | 0.006659  |
| 4  | 6  | 0 | -5.395114 | -0.705905 | 0.003336  |
| 5  | 6  | 0 | -5.395125 | 0.705824  | -0.003327 |
| 6  | 6  | 0 | -4.223161 | 1.464415  | -0.006654 |
| 7  | 7  | 0 | -1.732761 | -1.138996 | 0.004199  |
| 8  | 7  | 0 | -1.732778 | 1.138970  | -0.004200 |
| 9  | 7  | 0 | -1.036671 | -0.000007 | -0.000001 |
| 10 | 6  | 0 | 0.385805  | 0.000003  | -0.000002 |
| 11 | 6  | 0 | 1.077653  | 1.214199  | 0.006716  |
| 12 | 6  | 0 | 1.077671  | -1.214183 | -0.006719 |
| 13 | 6  | 0 | 2.467859  | 1.203800  | 0.006590  |
| 14 | 1  | 0 | 0.523319  | 2.144611  | 0.002014  |
| 15 | 6  | 0 | 2.467876  | -1.203763 | -0.006592 |
| 16 | 1  | 0 | 0.523351  | -2.144602 | -0.002016 |
| 17 | 6  | 0 | 3.193832  | 0.000024  | -0.000001 |
| 18 | 1  | 0 | 2.999497  | 2.150411  | -0.015898 |
| 19 | 1  | 0 | 2.999529  | -2.150365 | 0.015896  |
| 20 | 6  | 0 | -4.229945 | 2.879233  | -0.014227 |
| 21 | 6  | 0 | -4.235617 | 4.096525  | -0.021731 |
| 22 | 6  | 0 | -4.229901 | -2.879296 | 0.014233  |
| 23 | 6  | 0 | -4.235549 | -4.096587 | 0.021736  |
| 24 | 6  | 0 | -4.230800 | 5.519288  | -0.031134 |
| 25 | 6  | 0 | -5.440868 | 6.242938  | -0.032549 |
| 26 | 6  | 0 | -3.012142 | 6.228777  | -0.039584 |
| 27 | 6  | 0 | -5.427649 | 7.634611  | -0.042173 |
| 28 | 1  | 0 | -6.381259 | 5.700457  | -0.026108 |
| 29 | 6  | 0 | -3.009586 | 7.620409  | -0.049191 |
| 30 | 1  | 0 | -2.079335 | 5.673576  | -0.038718 |
| 31 | 6  | 0 | -4.214587 | 8.328166  | -0.050505 |
| 32 | 1  | 0 | -6.367012 | 8.180866  | -0.043222 |
| 33 | 1  | 0 | -2.064054 | 8.155911  | -0.055810 |
| 34 | 6  | 0 | -4.230676 | -5.519351 | 0.031135  |
| 35 | 6  | 0 | -5.440716 | -6.243049 | 0.032553  |
| 36 | 6  | 0 | -3.011990 | -6.228792 | 0.039578  |
| 37 | 6  | 0 | -5.427442 | -7.634722 | 0.042173  |
| 38 | 1  | 0 | -6.381128 | -5.700605 | 0.026117  |
| 39 | 6  | 0 | -3.009379 | -7.620424 | 0.049180  |
| 40 | 1  | 0 | -2.079204 | -5.673554 | 0.038708  |
| 41 | 6  | 0 | -4.214352 | -8.328228 | 0.050498  |
| 42 | 1  | 0 | -6.366783 | -8.181013 | 0.043225  |
| 43 | 1  | 0 | -2.063826 | -8.155889 | 0.055794  |
| 44 | 1  | 0 | -6.347445 | 1.226320  | -0.005982 |
| 45 | 1  | 0 | -6.347426 | -1.226415 | 0.005994  |
| 46 | 1  | 0 | -4.208038 | -9.414714 | 0.058060  |
| 47 | 1  | 0 | -4.208316 | 9.414652  | -0.058071 |
| 48 | 6  | 0 | 4.676862  | 0.000035  | -0.000001 |
| 49 | 6  | 0 | 5.401232  | 0.949381  | 0.740621  |
| 50 | 6  | 0 | 5.401246  | -0.949301 | -0.740622 |
| 51 | 6  | 0 | 6.794407  | 0.955572  | 0.745745  |
| 52 | 1  | 0 | 4.869717  | 1.678721  | 1.344940  |
| 53 | 6  | 0 | 6.794421  | -0.955471 | -0.745745 |
| 54 | 1  | 0 | 4.869743  | -1.678648 | -1.344941 |
| 55 | 6  | 0 | 7.481733  | 0.000055  | 0.000000  |
| 56 | 1  | 0 | 7.340648  | 1.688230  | 1.329860  |
| 57 | 1  | 0 | 7.340674  | -1.688121 | -1.329859 |
| 58 | 35 | 0 | 9.392771  | 0.000069  | 0.000001  |

1f

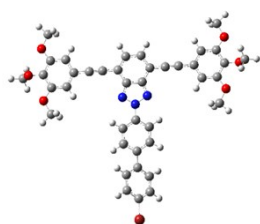

| Center<br>Number | Atomic<br>Number | Atomic<br>Type | Coordinates (Angstroms) |           |           |
|------------------|------------------|----------------|-------------------------|-----------|-----------|
|                  |                  |                | X                       | Y         | Z         |
| 1                | 6                | 0              | 0.712598                | -1.925519 | 0.013231  |
| 2                | 6                | 0              | -0.712887               | -1.925417 | -0.013273 |
| 3                | 6                | 0              | -1.465748               | -3.139929 | -0.026670 |
| 4                | 6                | 0              | -0.705948               | -4.311371 | -0.012792 |
| 5                | 6                | 0              | 0.705332                | -4.311471 | 0.012761  |
| 6                | 6                | 0              | 1.465293                | -3.140134 | 0.026635  |
| 7                | 7                | 0              | -1.138964               | -0.649743 | -0.021517 |
| 8                | 7                | 0              | 1.138857                | -0.649906 | 0.021475  |
| 9                | 7                | 0              | -0.000003               | 0.046583  | -0.000031 |
| 10               | 6                | 0              | 0.000101                | 1.468565  | -0.000035 |
| 11               | 6                | 0              | 1.213643                | 2.160851  | 0.033650  |
| 12               | 6                | 0              | -1.213339               | 2.161033  | -0.033719 |
| 13               | 6                | 0              | 1.203412                | 3.551059  | 0.033363  |
| 14               | 1                | 0              | 2.143598                | 1.606004  | 0.049815  |
| 15               | 6                | 0              | -1.202899               | 3.551239  | -0.033427 |
| 16               | 1                | 0              | -2.143377               | 1.606324  | -0.049883 |
| 17               | 6                | 0              | 0.000311                | 4.277340  | -0.000029 |
| 18               | 1                | 0              | 2.150229                | 4.082872  | 0.032084  |
| 19               | 1                | 0              | -2.149636               | 4.083194  | -0.032147 |
| 20               | 6                | 0              | 2.879379                | -3.147705 | 0.051407  |
| 21               | 6                | 0              | 4.096867                | -3.156128 | 0.072530  |
| 22               | 6                | 0              | -2.879836               | -3.147321 | -0.051425 |
| 23               | 6                | 0              | -4.097325               | -3.155625 | -0.072518 |
| 24               | 6                | 0              | 5.518993                | -3.156030 | 0.095135  |
| 25               | 6                | 0              | 6.216069                | -1.933323 | 0.099149  |
| 26               | 6                | 0              | 6.221824                | -4.375335 | 0.110838  |
| 27               | 6                | 0              | 7.612606                | -1.933711 | 0.120642  |
| 28               | 1                | 0              | 5.651724                | -1.010033 | 0.081880  |
| 29               | 6                | 0              | 7.618456                | -4.368539 | 0.132283  |
| 30               | 1                | 0              | 5.663701                | -5.302590 | 0.102425  |
| 31               | 6                | 0              | 8.322088                | -3.149355 | 0.149464  |
| 32               | 6                | 0              | -5.519451               | -3.155386 | -0.095126 |
| 33               | 6                | 0              | -6.216407               | -1.932608 | -0.099126 |
| 34               | 6                | 0              | -6.222400               | -4.374620 | -0.110842 |
| 35               | 6                | 0              | -7.612941               | -1.932857 | -0.120610 |
| 36               | 1                | 0              | -5.651967               | -1.009376 | -0.081851 |
| 37               | 6                | 0              | -7.619036               | -4.367687 | -0.132280 |
| 38               | 1                | 0              | -5.664369               | -5.301929 | -0.102438 |
| 39               | 6                | 0              | -8.322544               | -3.148436 | -0.149440 |
| 40               | 1                | 0              | 1.225284                | -5.264109 | 0.022114  |
| 41               | 1                | 0              | -1.226036               | -5.263936 | -0.022135 |
| 42               | 8                | 0              | 8.398102                | -5.486278 | 0.137138  |
| 43               | 8                | 0              | 9.687462                | -3.146138 | 0.247156  |
| 44               | 8                | 0              | 8.387069                | -0.812357 | 0.114867  |
| 45               | 8                | 0              | -8.398790               | -5.485350 | -0.137130 |
| 46               | 8                | 0              | -9.687917               | -3.145096 | -0.247120 |
| 47               | 8                | 0              | -8.387296               | -0.811429 | -0.114833 |
| 48               | 6                | 0              | 10.375857               | -3.143297 | -1.005045 |
| 49               | 1                | 0              | 10.131607               | -2.246314 | -1.587214 |
| 50               | 1                | 0              | 11.441940               | -3.140882 | -0.766045 |
| 51               | 1                | 0              | 10.136064               | -4.040595 | -1.588682 |
| 52               | 6                | 0              | 7.753246                | -6.749979 | 0.156291  |
| 53               | 1                | 0              | 7.128316                | -6.869674 | 1.050840  |
| 54               | 1                | 0              | 7.135371                | -6.903405 | -0.738481 |
| 55               | 1                | 0              | 8.553956                | -7.491524 | 0.173516  |
| 56               | 6                | 0              | 7.735673                | 0.448207  | 0.120985  |
| 57               | 1                | 0              | 7.117304                | 0.589094  | -0.775448 |
| 58               | 1                | 0              | 7.109722                | 0.573383  | 1.014039  |
| 59               | 1                | 0              | 8.532670                | 1.193911  | 0.131000  |
| 60               | 6                | 0              | -7.754063               | -6.749118 | -0.156329 |
| 61               | 1                | 0              | -7.129160               | -6.868852 | -1.050891 |
| 62               | 1                | 0              | -7.136192               | -6.902632 | 0.738430  |

|    |    |   |            |           |           |
|----|----|---|------------|-----------|-----------|
| 63 | 1  | 0 | -8.554850  | -7.490580 | -0.173561 |
| 64 | 6  | 0 | -10.376318 | -3.142074 | 1.005080  |
| 65 | 1  | 0 | -10.132079 | -2.245000 | 1.587111  |
| 66 | 1  | 0 | -11.442398 | -3.139714 | 0.766072  |
| 67 | 1  | 0 | -10.136516 | -4.039278 | 1.588857  |
| 68 | 6  | 0 | -7.735777  | 0.449071  | -0.120833 |
| 69 | 1  | 0 | -7.117383  | 0.589807  | 0.775605  |
| 70 | 1  | 0 | -7.109824  | 0.574274  | -1.013883 |
| 71 | 1  | 0 | -8.532701  | 1.194855  | -0.130766 |
| 72 | 6  | 0 | 0.000422   | 5.760312  | -0.000023 |
| 73 | 6  | 0 | -0.931722  | 6.484876  | -0.762017 |
| 74 | 6  | 0 | 0.932672   | 6.484728  | 0.761981  |
| 75 | 6  | 0 | -0.937750  | 7.878063  | -0.767262 |
| 76 | 1  | 0 | -1.647142  | 5.953489  | -1.382920 |
| 77 | 6  | 0 | 0.938904   | 7.877915  | 0.767247  |
| 78 | 1  | 0 | 1.648014   | 5.953228  | 1.382878  |
| 79 | 6  | 0 | 0.000627   | 8.565349  | -0.000002 |
| 80 | 1  | 0 | -1.656907  | 8.424248  | -1.367940 |
| 81 | 1  | 0 | 1.658141   | 8.423985  | 1.367934  |
| 82 | 35 | 0 | 0.000764   | 10.476360 | 0.000014  |

1g

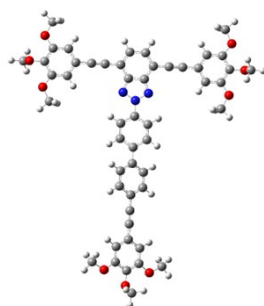

| Center Number | Atomic Number | Atomic Type | Coordinates (Angstroms) |           |           |
|---------------|---------------|-------------|-------------------------|-----------|-----------|
|               |               |             | X                       | Y         | Z         |
| 1             | 6             | 0           | 4.419449                | 0.723731  | -0.002826 |
| 2             | 6             | 0           | 4.424746                | -0.701776 | -0.009304 |
| 3             | 6             | 0           | 5.642017                | -1.449965 | -0.016306 |
| 4             | 6             | 0           | 6.810869                | -0.685857 | -0.017035 |
| 5             | 6             | 0           | 6.805645                | 0.725491  | -0.011219 |
| 6             | 6             | 0           | 5.631175                | 1.480911  | -0.003985 |
| 7             | 7             | 0           | 3.150557                | -1.132786 | -0.007051 |
| 8             | 7             | 0           | 3.142054                | 1.145202  | 0.003898  |
| 9             | 7             | 0           | 2.449857                | 0.003589  | 0.000883  |
| 10            | 6             | 0           | 1.027759                | -0.001917 | 0.006416  |
| 11            | 6             | 0           | 0.330213                | 1.209054  | 0.024123  |
| 12            | 6             | 0           | 0.339799                | -1.218434 | -0.005635 |
| 13            | 6             | 0           | -1.059716               | 1.193172  | 0.029887  |
| 14            | 1             | 0           | 0.881083                | 2.141546  | 0.023300  |
| 15            | 6             | 0           | -1.050159               | -1.213641 | 0.000487  |
| 16            | 1             | 0           | 0.898065                | -2.146503 | -0.009343 |
| 17            | 6             | 0           | -1.782771               | -0.013161 | 0.018386  |
| 18            | 1             | 0           | -1.594825               | 2.137917  | 0.015741  |
| 19            | 1             | 0           | -1.577566               | -2.162609 | 0.019472  |
| 20            | 6             | 0           | 5.633227                | 2.895293  | 0.001087  |
| 21            | 6             | 0           | 5.635858                | 4.112966  | 0.005150  |
| 22            | 6             | 0           | 5.654479                | -2.864292 | -0.020951 |
| 23            | 6             | 0           | 5.666142                | -4.081915 | -0.024351 |
| 24            | 6             | 0           | 5.627656                | 5.535262  | 0.007309  |
| 25            | 6             | 0           | 4.400830                | 6.225059  | 0.004629  |
| 26            | 6             | 0           | 6.842714                | 6.245575  | 0.009258  |
| 27            | 6             | 0           | 4.392878                | 7.621748  | 0.005261  |
| 28            | 1             | 0           | 3.480952                | 5.654934  | -0.001724 |

|    |   |   |            |            |           |
|----|---|---|------------|------------|-----------|
| 29 | 6 | 0 | 6.827568   | 7.642286   | 0.009935  |
| 30 | 1 | 0 | 7.773260   | 5.692905   | 0.006422  |
| 31 | 6 | 0 | 5.604278   | 8.338841   | 0.019964  |
| 32 | 6 | 0 | 5.668395   | -5.504233  | -0.025483 |
| 33 | 6 | 0 | 4.446708   | -6.203014  | -0.014730 |
| 34 | 6 | 0 | 6.888614   | -6.205593  | -0.034369 |
| 35 | 6 | 0 | 4.448997   | -7.599703  | -0.014302 |
| 36 | 1 | 0 | 3.522722   | -5.639667  | -0.003157 |
| 37 | 6 | 0 | 6.883710   | -7.602403  | -0.033808 |
| 38 | 1 | 0 | 7.815083   | -5.646107  | -0.037555 |
| 39 | 6 | 0 | 5.665517   | -8.307905  | -0.035873 |
| 40 | 1 | 0 | 7.756227   | 1.249298   | -0.012322 |
| 41 | 1 | 0 | 7.765296   | -1.202595  | -0.022277 |
| 42 | 8 | 0 | 7.940720   | 8.428643   | -0.000146 |
| 43 | 8 | 0 | 5.592935   | 9.705670   | 0.096472  |
| 44 | 8 | 0 | 3.266724   | 8.389223   | -0.009063 |
| 45 | 8 | 0 | 8.002647   | -8.380521  | -0.029790 |
| 46 | 8 | 0 | 5.664195   | -9.674834  | -0.111231 |
| 47 | 8 | 0 | 3.328662   | -8.375484  | 0.007464  |
| 48 | 6 | 0 | 5.586303   | 10.373974  | -1.166422 |
| 49 | 1 | 0 | 4.691094   | 10.114852  | -1.744939 |
| 50 | 1 | 0 | 5.577105   | 11.443732  | -0.944521 |
| 51 | 1 | 0 | 6.485270   | 10.130539  | -1.745982 |
| 52 | 6 | 0 | 9.208259   | 7.791656   | 0.025149  |
| 53 | 1 | 0 | 9.334217   | 7.181017   | 0.928674  |
| 54 | 1 | 0 | 9.362944   | 7.161217   | -0.860600 |
| 55 | 1 | 0 | 9.945089   | 8.596904   | 0.028170  |
| 56 | 6 | 0 | 2.010329   | 7.730026   | 0.009737  |
| 57 | 1 | 0 | 1.871442   | 7.097294   | -0.876912 |
| 58 | 1 | 0 | 1.891027   | 7.116804   | 0.912368  |
| 59 | 1 | 0 | 1.259591   | 8.522364   | 0.009423  |
| 60 | 6 | 0 | 9.265229   | -7.734151  | -0.062537 |
| 61 | 1 | 0 | 9.381659   | -7.123230  | -0.967154 |
| 62 | 1 | 0 | 9.420092   | -7.101932  | 0.821911  |
| 63 | 1 | 0 | 10.008011  | -8.533895  | -0.069077 |
| 64 | 6 | 0 | 5.662154   | -10.342115 | 1.152241  |
| 65 | 1 | 0 | 4.764801   | -10.089411 | 1.730217  |
| 66 | 1 | 0 | 5.661319   | -11.412099 | 0.931246  |
| 67 | 1 | 0 | 6.559049   | -10.091260 | 1.731892  |
| 68 | 6 | 0 | 2.067232   | -7.725738  | -0.003770 |
| 69 | 1 | 0 | 1.929213   | -7.093497  | 0.883356  |
| 70 | 1 | 0 | 1.937624   | -7.114043  | -0.906016 |
| 71 | 1 | 0 | 1.322489   | -8.523688  | 0.001784  |
| 72 | 6 | 0 | -3.264086  | -0.019611  | 0.025638  |
| 73 | 6 | 0 | -3.990270  | -0.985435  | -0.694611 |
| 74 | 6 | 0 | -3.991833  | 0.939016   | 0.753860  |
| 75 | 6 | 0 | -5.378967  | -0.996535  | -0.689686 |
| 76 | 1 | 0 | -3.457157  | -1.721062  | -1.290073 |
| 77 | 6 | 0 | -5.380579  | 0.935392   | 0.765468  |
| 78 | 1 | 0 | -3.459519  | 1.680076   | 1.343274  |
| 79 | 6 | 0 | -6.104292  | -0.034669  | 0.042541  |
| 80 | 1 | 0 | -5.919969  | -1.744845  | -1.260584 |
| 81 | 1 | 0 | -5.922622  | 1.677600   | 1.343302  |
| 82 | 6 | 0 | -7.526770  | -0.043729  | 0.052368  |
| 83 | 6 | 0 | -8.743762  | -0.053584  | 0.062091  |
| 84 | 6 | 0 | -10.168023 | -0.066185  | 0.073296  |
| 85 | 6 | 0 | -10.871714 | 0.913884   | 0.796966  |
| 86 | 6 | 0 | -10.864914 | -1.058588  | -0.640201 |
| 87 | 6 | 0 | -12.268786 | 0.897862   | 0.807071  |
| 88 | 1 | 0 | -10.314131 | 1.670364   | 1.333679  |
| 89 | 6 | 0 | -12.261836 | -1.069810  | -0.625652 |
| 90 | 1 | 0 | -10.302211 | -1.799575  | -1.192948 |
| 91 | 6 | 0 | -12.972186 | -0.100207  | 0.106829  |
| 92 | 8 | 0 | -13.047736 | 1.803314   | 1.463197  |
| 93 | 8 | 0 | -14.337963 | -0.157930  | 0.182791  |
| 94 | 8 | 0 | -13.034896 | -1.976370  | -1.287759 |
| 95 | 6 | 0 | -12.402500 | 2.816601   | 2.218084  |
| 96 | 1 | 0 | -11.779110 | 2.390423   | 3.014913  |

|     |   |   |            |           |           |
|-----|---|---|------------|-----------|-----------|
| 97  | 1 | 0 | -11.782909 | 3.463298  | 1.582530  |
| 98  | 1 | 0 | -13.203063 | 3.409305  | 2.664328  |
| 99  | 6 | 0 | -12.382984 | -3.004904 | -2.015976 |
| 100 | 1 | 0 | -11.761366 | -2.597862 | -2.824593 |
| 101 | 1 | 0 | -11.760207 | -3.628878 | -1.361788 |
| 102 | 1 | 0 | -13.179580 | -3.615137 | -2.445350 |
| 103 | 6 | 0 | -15.023927 | 0.552332  | -0.849939 |
| 104 | 1 | 0 | -14.779634 | 0.144615  | -1.838435 |
| 105 | 1 | 0 | -16.090507 | 0.416862  | -0.655648 |
| 106 | 1 | 0 | -14.781989 | 1.621937  | -0.820160 |

### Z-Matrix of aggregates of derivatives 1a, 1c and 1e.

#### 1a

#### Vartical aggregate

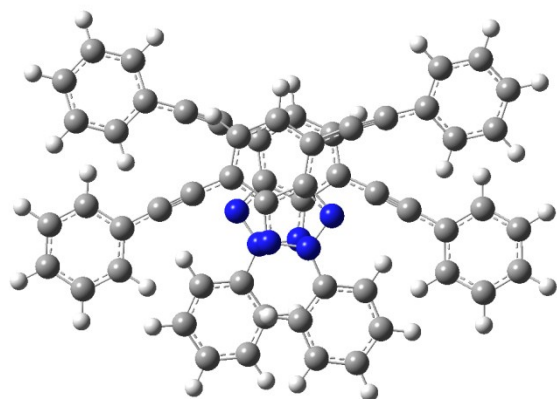

| Center Number | Atomic Number | Atomic Type | Coordinates (Angstroms) |           |           |
|---------------|---------------|-------------|-------------------------|-----------|-----------|
|               |               |             | X                       | Y         | Z         |
| 1             | 6             | 0           | 0.635200                | 0.121288  | -1.612515 |
| 2             | 6             | 0           | -0.674039               | 0.693462  | -1.619351 |
| 3             | 6             | 0           | -0.877695               | 2.110764  | -1.657165 |
| 4             | 6             | 0           | 0.292157                | 2.890518  | -1.719048 |
| 5             | 6             | 0           | 1.587850                | 2.325477  | -1.710541 |
| 6             | 6             | 0           | 1.811868                | 0.937261  | -1.643621 |
| 7             | 1             | 0           | 0.191550                | 3.974839  | -1.738967 |
| 8             | 1             | 0           | 2.452038                | 2.987030  | -1.717006 |
| 9             | 7             | 0           | -1.583549               | -0.302321 | -1.550422 |
| 10            | 7             | 0           | -0.812994               | -1.397106 | -1.497525 |
| 11            | 7             | 0           | 0.517840                | -1.222466 | -1.533251 |
| 12            | 6             | 0           | -1.383726               | -2.696071 | -1.354839 |
| 13            | 6             | 0           | -2.743146               | -2.817553 | -1.016636 |
| 14            | 6             | 0           | -0.574018               | -3.828671 | -1.541072 |
| 15            | 6             | 0           | -3.293274               | -4.097357 | -0.881099 |
| 16            | 1             | 0           | -3.338179               | -1.923133 | -0.851935 |
| 17            | 6             | 0           | -1.141289               | -5.099950 | -1.392511 |
| 18            | 1             | 0           | 0.478333                | -3.701698 | -1.780705 |
| 19            | 6             | 0           | -2.499255               | -5.241787 | -1.067272 |
| 20            | 1             | 0           | -4.348493               | -4.193133 | -0.624835 |
| 21            | 1             | 0           | -0.513190               | -5.980485 | -1.528943 |
| 22            | 6             | 0           | 1.384025                | -2.696605 | 1.354778  |

|    |   |   |           |           |           |
|----|---|---|-----------|-----------|-----------|
| 23 | 7 | 0 | 0.813176  | -1.397711 | 1.497575  |
| 24 | 6 | 0 | 2.743326  | -2.817948 | 1.016039  |
| 25 | 6 | 0 | 0.574530  | -3.829288 | 1.541419  |
| 26 | 7 | 0 | 1.583625  | -0.302852 | 1.550464  |
| 27 | 7 | 0 | -0.517679 | -1.223226 | 1.533366  |
| 28 | 6 | 0 | 3.293545  | -4.097698 | 0.880345  |
| 29 | 1 | 0 | 3.338198  | -1.923471 | 0.851054  |
| 30 | 6 | 0 | 1.141888  | -5.100510 | 1.392714  |
| 31 | 1 | 0 | -0.477737 | -3.702409 | 1.781476  |
| 32 | 6 | 0 | 0.674014  | 0.692829  | 1.619456  |
| 33 | 6 | 0 | -0.635167 | 0.120517  | 1.612647  |
| 34 | 6 | 0 | 2.499736  | -5.242207 | 1.066917  |
| 35 | 1 | 0 | 4.348672  | -4.193369 | 0.623653  |
| 36 | 1 | 0 | 0.513959  | -5.981114 | 1.529485  |
| 37 | 6 | 0 | 0.877522  | 2.110151  | 1.657322  |
| 38 | 6 | 0 | -1.811918 | 0.936372  | 1.643740  |
| 39 | 6 | 0 | -0.292407 | 2.889780  | 1.719226  |
| 40 | 6 | 0 | -1.588043 | 2.324607  | 1.710694  |
| 41 | 1 | 0 | -0.191912 | 3.974110  | 1.739172  |
| 42 | 1 | 0 | -2.452296 | 2.986075  | 1.717142  |
| 43 | 1 | 0 | 2.936490  | -6.235500 | 0.957080  |
| 44 | 1 | 0 | -2.935940 | -6.235123 | -0.957554 |
| 45 | 6 | 0 | 2.180902  | 2.644235  | 1.570429  |
| 46 | 6 | 0 | 3.347256  | 3.005357  | 1.443260  |
| 47 | 6 | 0 | -3.100144 | 0.366092  | 1.561746  |
| 48 | 6 | 0 | -4.198661 | -0.174627 | 1.474278  |
| 49 | 6 | 0 | -5.451400 | -0.831465 | 1.351455  |
| 50 | 6 | 0 | -6.663062 | -0.093863 | 1.302061  |
| 51 | 6 | 0 | -5.505227 | -2.248417 | 1.268660  |
| 52 | 6 | 0 | -7.886023 | -0.758091 | 1.158926  |
| 53 | 1 | 0 | -6.623658 | 0.992172  | 1.365887  |
| 54 | 6 | 0 | -6.734669 | -2.899580 | 1.125627  |
| 55 | 1 | 0 | -4.575355 | -2.813425 | 1.314151  |
| 56 | 6 | 0 | -7.928793 | -2.159981 | 1.066861  |
| 57 | 1 | 0 | -8.811111 | -0.180596 | 1.122539  |
| 58 | 1 | 0 | -6.764029 | -3.988664 | 1.064075  |
| 59 | 1 | 0 | -8.885093 | -2.672242 | 0.955077  |
| 60 | 6 | 0 | 4.714329  | 3.353803  | 1.282045  |
| 61 | 6 | 0 | 5.147624  | 4.703519  | 1.342735  |
| 62 | 6 | 0 | 5.674095  | 2.331270  | 1.054801  |
| 63 | 6 | 0 | 6.502227  | 5.016002  | 1.185509  |
| 64 | 1 | 0 | 4.412529  | 5.489400  | 1.515805  |
| 65 | 6 | 0 | 7.025514  | 2.657382  | 0.903766  |
| 66 | 1 | 0 | 5.339544  | 1.296704  | 0.994602  |
| 67 | 6 | 0 | 7.445806  | 3.997329  | 0.968319  |
| 68 | 1 | 0 | 6.824584  | 6.057010  | 1.234613  |
| 69 | 1 | 0 | 7.750432  | 1.860397  | 0.734642  |
| 70 | 1 | 0 | 8.501175  | 4.246463  | 0.850296  |
| 71 | 6 | 0 | 3.100145  | 0.367072  | -1.561756 |
| 72 | 6 | 0 | 4.198679  | -0.173641 | -1.474462 |
| 73 | 6 | 0 | -2.181119 | 2.644716  | -1.570204 |
| 74 | 6 | 0 | -3.347490 | 3.005752  | -1.442940 |
| 75 | 6 | 0 | 5.451383  | -0.830585 | -1.351840 |
| 76 | 6 | 0 | 6.663127  | -0.093114 | -1.302557 |
| 77 | 6 | 0 | 5.505070  | -2.247551 | -1.269146 |
| 78 | 6 | 0 | 7.886037  | -0.757486 | -1.159640 |
| 79 | 1 | 0 | 6.623829  | 0.992931  | -1.366279 |
| 80 | 6 | 0 | 6.734460  | -2.898857 | -1.126337 |
| 81 | 1 | 0 | 4.575130  | -2.812455 | -1.314546 |
| 82 | 6 | 0 | 7.928672  | -2.159387 | -1.067690 |
| 83 | 1 | 0 | 8.811188  | -0.180090 | -1.123331 |
| 84 | 1 | 0 | 6.763714  | -3.987950 | -1.064872 |
| 85 | 1 | 0 | 8.884933  | -2.671758 | -0.956080 |
| 86 | 6 | 0 | -4.714561 | 3.354155  | -1.281606 |
| 87 | 6 | 0 | -5.147911 | 4.703847  | -1.342478 |
| 88 | 6 | 0 | -5.674259 | 2.331634  | -1.054027 |
| 89 | 6 | 0 | -6.502499 | 5.016317  | -1.185095 |
| 90 | 1 | 0 | -4.412869 | 5.489720  | -1.515806 |



|    |   |   |           |          |           |
|----|---|---|-----------|----------|-----------|
| 91 | 6 | 0 | -7.025663 | 2.657734 | -0.902830 |
| 92 | 1 | 0 | -5.339680 | 1.297085 | -0.993716 |
| 93 | 6 | 0 | -7.446011 | 3.997655 | -0.967561 |
| 94 | 1 | 0 | -6.824896 | 6.057305 | -1.234342 |
| 95 | 1 | 0 | -7.750532 | 1.860754 | -0.733472 |
| 96 | 1 | 0 | -8.501369 | 4.246776 | -0.849413 |

### Horizontal aggregate

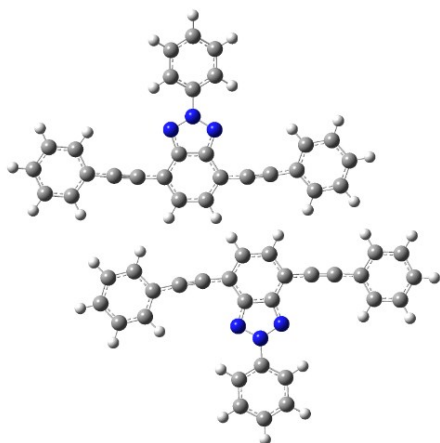

| Center Number | Atomic Number | Atomic Type | Coordinates (Angstroms) |           |           |
|---------------|---------------|-------------|-------------------------|-----------|-----------|
|               |               |             | X                       | Y         | Z         |
| 1             | 6             | 0           | -3.785638               | -1.529862 | -0.488980 |
| 2             | 6             | 0           | -2.551940               | -2.255637 | -0.529275 |
| 3             | 6             | 0           | -1.304954               | -1.608305 | -0.817245 |
| 4             | 6             | 0           | -1.382183               | -0.220311 | -1.048256 |
| 5             | 6             | 0           | -2.599871               | 0.495627  | -1.009815 |
| 6             | 6             | 0           | -3.838146               | -0.118299 | -0.735564 |
| 7             | 1             | 0           | -0.462437               | 0.324232  | -1.250704 |
| 8             | 1             | 0           | -2.581027               | 1.569339  | -1.183899 |
| 9             | 7             | 0           | -2.805945               | -3.554598 | -0.257268 |
| 10            | 7             | 0           | -4.135845               | -3.560879 | -0.069996 |
| 11            | 7             | 0           | -4.783912               | -2.390807 | -0.192580 |
| 12            | 6             | 0           | -4.834690               | -4.765548 | 0.250886  |
| 13            | 6             | 0           | -4.122183               | -5.974565 | 0.345129  |
| 14            | 6             | 0           | -6.223567               | -4.721965 | 0.468368  |
| 15            | 6             | 0           | -4.816155               | -7.148582 | 0.661977  |
| 16            | 1             | 0           | -3.049050               | -5.978256 | 0.171348  |
| 17            | 6             | 0           | -6.898941               | -5.907083 | 0.783889  |
| 18            | 1             | 0           | -6.748168               | -3.773127 | 0.388508  |
| 19            | 6             | 0           | -6.202672               | -7.122499 | 0.882497  |
| 20            | 1             | 0           | -4.267139               | -8.087760 | 0.735735  |
| 21            | 1             | 0           | -7.975653               | -5.876961 | 0.953335  |
| 22            | 1             | 0           | -6.735840               | -8.041175 | 1.128724  |
| 23            | 6             | 0           | -5.049279               | 0.607490  | -0.693952 |
| 24            | 6             | 0           | -6.095321               | 1.248706  | -0.650943 |
| 25            | 6             | 0           | -0.084663               | -2.318803 | -0.862216 |
| 26            | 6             | 0           | 0.976777                | -2.934718 | -0.906451 |
| 27            | 6             | 0           | -7.293035               | 2.009529  | -0.585645 |

|    |   |   |            |           |           |
|----|---|---|------------|-----------|-----------|
| 28 | 6 | 0 | -7.274073  | 3.404698  | -0.851573 |
| 29 | 6 | 0 | -8.524053  | 1.391349  | -0.242893 |
| 30 | 6 | 0 | -8.453423  | 4.152080  | -0.771495 |
| 31 | 1 | 0 | -6.328049  | 3.880478  | -1.104800 |
| 32 | 6 | 0 | -9.696428  | 2.150354  | -0.167543 |
| 33 | 1 | 0 | -8.538367  | 0.320818  | -0.039459 |
| 34 | 6 | 0 | -9.667212  | 3.530864  | -0.429955 |
| 35 | 1 | 0 | -8.427373  | 5.223066  | -0.977994 |
| 36 | 1 | 0 | -10.636824 | 1.665026  | 0.097101  |
| 37 | 1 | 0 | -10.584203 | 4.118254  | -0.369356 |
| 38 | 6 | 0 | 2.210697   | -3.637331 | -0.958773 |
| 39 | 6 | 0 | 3.412307   | -2.957104 | -1.288367 |
| 40 | 6 | 0 | 2.261652   | -5.028089 | -0.675699 |
| 41 | 6 | 0 | 4.624807   | -3.651405 | -1.331942 |
| 42 | 1 | 0 | 3.380114   | -1.887803 | -1.488544 |
| 43 | 6 | 0 | 3.481130   | -5.711095 | -0.722952 |
| 44 | 1 | 0 | 1.339103   | -5.549634 | -0.421567 |
| 45 | 6 | 0 | 4.665283   | -5.027367 | -1.050630 |
| 46 | 1 | 0 | 5.542761   | -3.114844 | -1.566741 |
| 47 | 1 | 0 | 3.509488   | -6.779270 | -0.503053 |
| 48 | 1 | 0 | 5.616709   | -5.559708 | -1.081501 |
| 49 | 1 | 0 | 0.462746   | -0.324884 | 1.251481  |
| 50 | 6 | 0 | 1.382413   | 0.219710  | 1.048797  |
| 51 | 6 | 0 | 1.304922   | 1.607702  | 0.817844  |
| 52 | 6 | 0 | 2.600191   | -0.496059 | 1.010016  |
| 53 | 6 | 0 | 2.551720   | 2.255228  | 0.529514  |
| 54 | 6 | 0 | 0.084533   | 2.318014  | 0.863186  |
| 55 | 6 | 0 | 3.838295   | 0.118070  | 0.735436  |
| 56 | 1 | 0 | 2.581557   | -1.569779 | 1.184084  |
| 57 | 6 | 0 | 3.785505   | 1.529629  | 0.488878  |
| 58 | 7 | 0 | 2.805463   | 3.554230  | 0.257432  |
| 59 | 6 | 0 | -0.977002  | 2.933743  | 0.907737  |
| 60 | 6 | 0 | 5.049585   | -0.607443 | 0.693470  |
| 61 | 7 | 0 | 4.783582   | 2.390716  | 0.192217  |
| 62 | 7 | 0 | 4.135313   | 3.560694  | 0.069808  |
| 63 | 6 | 0 | -2.210990  | 3.636214  | 0.960385  |
| 64 | 6 | 0 | 6.095899   | -1.248187 | 0.650052  |
| 65 | 6 | 0 | 4.833919   | 4.765451  | -0.251249 |
| 66 | 6 | 0 | -3.412489  | 2.955819  | 1.290035  |
| 67 | 6 | 0 | -2.262108  | 5.027021  | 0.677587  |
| 68 | 6 | 0 | 7.294018   | -2.008340 | 0.584353  |
| 69 | 6 | 0 | 4.121225   | 5.974362  | -0.345391 |
| 70 | 6 | 0 | 6.222758   | 4.722043  | -0.468997 |
| 71 | 6 | 0 | -4.625045  | 3.650001  | 1.333928  |
| 72 | 1 | 0 | -3.380169  | 1.886482  | 1.489995  |
| 73 | 6 | 0 | -3.481637  | 5.709915  | 0.725178  |
| 74 | 1 | 0 | -1.339642  | 5.548693  | 0.423411  |
| 75 | 6 | 0 | 7.276111   | -3.403389 | 0.850970  |
| 76 | 6 | 0 | 8.524426   | -1.389556 | 0.240498  |
| 77 | 6 | 0 | 4.814976   | 7.148463  | -0.662416 |
| 78 | 1 | 0 | 3.048125   | 5.977906  | -0.171399 |
| 79 | 6 | 0 | 6.897914   | 5.907243  | -0.784677 |
| 80 | 1 | 0 | 6.747490   | 3.773271  | -0.389209 |
| 81 | 6 | 0 | -4.665678  | 5.026021  | 1.052911  |
| 82 | 1 | 0 | -5.542932  | 3.113309  | 1.568702  |
| 83 | 1 | 0 | -3.510123  | 6.778132  | 0.505500  |
| 84 | 6 | 0 | 8.455885   | -4.150062 | 0.770510  |
| 85 | 1 | 0 | 6.330560   | -3.879640 | 1.105079  |
| 86 | 6 | 0 | 9.697232   | -2.147855 | 0.164763  |
| 87 | 1 | 0 | 8.537932   | -0.319117 | 0.036530  |
| 88 | 6 | 0 | 6.201456   | 7.122559  | -0.883192 |
| 89 | 1 | 0 | 4.265821   | 8.087567  | -0.736102 |
| 90 | 1 | 0 | 7.974599   | 5.877267  | -0.954323 |
| 91 | 1 | 0 | -5.617150  | 5.558262  | 1.084008  |
| 92 | 6 | 0 | 9.669062   | -3.528250 | 0.427881  |
| 93 | 1 | 0 | 8.430647   | -5.220962 | 0.977557  |
| 94 | 1 | 0 | 10.637146  | -1.662060 | -0.100738 |
| 95 | 1 | 0 | 6.734453   | 8.041300  | -1.129548 |

96 1 0 10.586384 -4.115092 0.366988

1c

Vartical aggregate

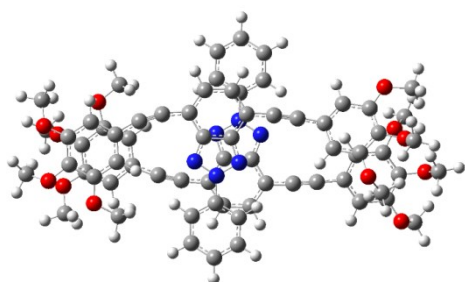

| Center Number | Atomic Number | Atomic Type | Coordinates (Angstroms) |           |           |
|---------------|---------------|-------------|-------------------------|-----------|-----------|
|               |               |             | X                       | Y         | Z         |
| 1             | 6             | 0           | 1.043057                | -0.405743 | -1.432906 |
| 2             | 6             | 0           | -0.384511               | -0.370635 | -1.488115 |
| 3             | 6             | 0           | -1.169707               | -1.571540 | -1.485124 |
| 4             | 6             | 0           | -0.439958               | -2.772322 | -1.427061 |
| 5             | 6             | 0           | 0.973254                | -2.805623 | -1.372002 |
| 6             | 6             | 0           | 1.765357                | -1.642345 | -1.372360 |
| 7             | 1             | 0           | -0.987974               | -3.712203 | -1.395952 |
| 8             | 1             | 0           | 1.471389                | -3.772182 | -1.314770 |
| 9             | 7             | 0           | -0.784294               | 0.918786  | -1.533926 |
| 10            | 7             | 0           | 0.382288                | 1.585552  | -1.510989 |
| 11            | 7             | 0           | 1.508952                | 0.859548  | -1.455087 |
| 12            | 6             | 0           | 0.423907                | 3.010411  | -1.503151 |
| 13            | 6             | 0           | -0.765300               | 3.737670  | -1.680426 |
| 14            | 6             | 0           | 1.649331                | 3.661002  | -1.278348 |
| 15            | 6             | 0           | -0.721118               | 5.135305  | -1.622303 |
| 16            | 1             | 0           | -1.698384               | 3.203432  | -1.839336 |
| 17            | 6             | 0           | 1.673254                | 5.059647  | -1.225111 |
| 18            | 1             | 0           | 2.546343                | 3.069523  | -1.116860 |
| 19            | 6             | 0           | 0.493291                | 5.802873  | -1.393626 |
| 20            | 1             | 0           | -1.642309               | 5.704038  | -1.754703 |
| 21            | 1             | 0           | 2.620128                | 5.568506  | -1.041602 |
| 22            | 1             | 0           | 0.519728                | 6.892016  | -1.346262 |
| 23            | 6             | 0           | 3.177209                | -1.652607 | -1.342809 |
| 24            | 6             | 0           | 4.402452                | -1.576563 | -1.366524 |
| 25            | 6             | 0           | -2.577058               | -1.479737 | -1.532384 |
| 26            | 6             | 0           | -3.776429               | -1.222157 | -1.595381 |
| 27            | 6             | 0           | 5.814195                | -1.458869 | -1.459246 |

|    |   |   |           |           |           |
|----|---|---|-----------|-----------|-----------|
| 28 | 6 | 0 | 6.613855  | -2.584614 | -1.780798 |
| 29 | 6 | 0 | 6.432268  | -0.195758 | -1.276828 |
| 30 | 6 | 0 | 8.003175  | -2.457376 | -1.901085 |
| 31 | 1 | 0 | 6.161121  | -3.564123 | -1.922896 |
| 32 | 6 | 0 | 7.815547  | -0.069894 | -1.424517 |
| 33 | 1 | 0 | 5.842197  | 0.677967  | -1.009175 |
| 34 | 6 | 0 | 8.617608  | -1.193701 | -1.734778 |
| 35 | 6 | 0 | -5.108690 | -0.737230 | -1.663666 |
| 36 | 6 | 0 | -6.221483 | -1.600773 | -1.788350 |
| 37 | 6 | 0 | -5.288296 | 0.664967  | -1.588166 |
| 38 | 6 | 0 | -7.513921 | -1.054654 | -1.829619 |
| 39 | 1 | 0 | -6.063657 | -2.673993 | -1.844900 |
| 40 | 6 | 0 | -6.581753 | 1.201774  | -1.623851 |
| 41 | 1 | 0 | -4.413850 | 1.294390  | -1.456611 |
| 42 | 6 | 0 | -7.700146 | 0.344588  | -1.739158 |
| 43 | 1 | 0 | 0.586691  | 4.051404  | 1.595598  |
| 44 | 6 | 0 | 0.039923  | 3.111991  | 1.652469  |
| 45 | 6 | 0 | 0.776933  | 1.913384  | 1.692161  |
| 46 | 6 | 0 | -1.375082 | 3.147709  | 1.646841  |
| 47 | 6 | 0 | -0.003195 | 0.710561  | 1.733001  |
| 48 | 6 | 0 | 2.186677  | 1.851193  | 1.671597  |
| 49 | 6 | 0 | -2.161371 | 1.983279  | 1.678134  |
| 50 | 1 | 0 | -1.873840 | 4.114916  | 1.603236  |
| 51 | 6 | 0 | -1.430716 | 0.747185  | 1.717972  |
| 52 | 7 | 0 | 0.396663  | -0.579834 | 1.760423  |
| 53 | 6 | 0 | 3.403764  | 1.693377  | 1.649691  |
| 54 | 6 | 0 | -3.570300 | 1.911532  | 1.669787  |
| 55 | 7 | 0 | -1.897563 | -0.518125 | 1.739565  |
| 56 | 7 | 0 | -0.770162 | -1.246208 | 1.761976  |
| 57 | 6 | 0 | 4.800717  | 1.442215  | 1.693049  |
| 58 | 6 | 0 | -4.747018 | 1.552535  | 1.683909  |
| 59 | 6 | 0 | -0.813638 | -2.670074 | 1.742852  |
| 60 | 6 | 0 | 5.736957  | 2.445777  | 1.367887  |
| 61 | 6 | 0 | 5.261961  | 0.161735  | 2.090143  |
| 62 | 6 | 0 | -5.988528 | 0.869343  | 1.658220  |
| 63 | 6 | 0 | 0.374716  | -3.401090 | 1.907996  |
| 64 | 6 | 0 | -2.040845 | -3.317957 | 1.519631  |
| 65 | 6 | 0 | 7.122934  | 2.214417  | 1.466516  |
| 66 | 1 | 0 | 5.401755  | 3.433664  | 1.057358  |
| 67 | 6 | 0 | 6.631848  | -0.073733 | 2.190297  |
| 68 | 1 | 0 | 4.561101  | -0.635917 | 2.324412  |
| 69 | 6 | 0 | -7.243711 | 1.506792  | 1.615080  |
| 70 | 6 | 0 | -5.913293 | -0.545562 | 1.631756  |
| 71 | 6 | 0 | 0.326007  | -4.798629 | 1.842347  |
| 72 | 1 | 0 | 1.310619  | -2.870305 | 2.062370  |
| 73 | 6 | 0 | -2.070071 | -4.715863 | 1.459523  |
| 74 | 1 | 0 | -2.937343 | -2.724874 | 1.366716  |
| 75 | 6 | 0 | 7.580956  | 0.941238  | 1.895066  |
| 76 | 6 | 0 | -8.418473 | 0.741608  | 1.536097  |
| 77 | 1 | 0 | -7.295578 | 2.591320  | 1.635378  |
| 78 | 6 | 0 | -7.078626 | -1.305093 | 1.534274  |
| 79 | 1 | 0 | -4.929895 | -1.005192 | 1.635029  |
| 80 | 6 | 0 | -0.891049 | -5.462891 | 1.618124  |
| 81 | 1 | 0 | 1.246886  | -5.369407 | 1.966045  |
| 82 | 1 | 0 | -3.019477 | -5.221670 | 1.279029  |
| 83 | 6 | 0 | -8.356967 | -0.678231 | 1.480025  |
| 84 | 1 | 0 | -0.920248 | -6.551735 | 1.566687  |
| 85 | 8 | 0 | -9.427316 | -1.519643 | 1.416721  |
| 86 | 8 | 0 | -9.669907 | 1.304721  | 1.516903  |
| 87 | 8 | 0 | 7.046656  | -1.305413 | 2.659965  |
| 88 | 8 | 0 | 8.934695  | 0.663800  | 2.008184  |
| 89 | 8 | 0 | 7.883146  | 3.305597  | 1.153197  |
| 90 | 8 | 0 | 8.751904  | -3.596049 | -2.112432 |
| 91 | 8 | 0 | 9.984725  | -1.059568 | -1.872776 |
| 92 | 8 | 0 | 8.401793  | 1.160962  | -1.204531 |
| 93 | 8 | 0 | -6.871593 | 2.536201  | -1.532880 |
| 94 | 8 | 0 | -8.971884 | 0.877453  | -1.700150 |
| 95 | 8 | 0 | -8.663637 | -1.786523 | -1.956118 |

|     |   |   |            |           |           |
|-----|---|---|------------|-----------|-----------|
| 96  | 8 | 0 | -7.086420  | -2.676340 | 1.440132  |
| 97  | 6 | 0 | -10.578521 | -1.167300 | 0.613743  |
| 98  | 1 | 0 | -10.268433 | -0.678118 | -0.317046 |
| 99  | 1 | 0 | -11.066239 | -2.126921 | 0.392911  |
| 100 | 1 | 0 | -11.262729 | -0.517480 | 1.175377  |
| 101 | 6 | 0 | -9.533407  | 1.093294  | -3.008362 |
| 102 | 1 | 0 | -9.623940  | 0.140726  | -3.554582 |
| 103 | 1 | 0 | -10.530234 | 1.524544  | -2.846310 |
| 104 | 1 | 0 | -8.912588  | 1.799085  | -3.584782 |
| 105 | 6 | 0 | -5.768673  | 3.421928  | -1.295264 |
| 106 | 1 | 0 | -5.241932  | 3.156590  | -0.364935 |
| 107 | 1 | 0 | -5.054439  | 3.398370  | -2.136643 |
| 108 | 1 | 0 | -6.208848  | 4.422980  | -1.212764 |
| 109 | 6 | 0 | -8.583823  | -3.188160 | -1.657164 |
| 110 | 1 | 0 | -7.960365  | -3.720161 | -2.396271 |
| 111 | 1 | 0 | -8.187904  | -3.337286 | -0.642115 |
| 112 | 1 | 0 | -9.614199  | -3.558029 | -1.719269 |
| 113 | 6 | 0 | -9.763203  | 2.645332  | 1.014443  |
| 114 | 1 | 0 | -9.383519  | 3.375154  | 1.750734  |
| 115 | 1 | 0 | -9.207387  | 2.738609  | 0.069321  |
| 116 | 1 | 0 | -10.833131 | 2.825886  | 0.850162  |
| 117 | 6 | 0 | -5.810595  | -3.320898 | 1.386059  |
| 118 | 1 | 0 | -5.220796  | -2.961860 | 0.525840  |
| 119 | 1 | 0 | -5.236139  | -3.151018 | 2.312383  |
| 120 | 1 | 0 | -6.025016  | -4.391154 | 1.276140  |
| 121 | 6 | 0 | 7.733181   | -2.122017 | 1.685549  |
| 122 | 1 | 0 | 7.086142   | -2.311009 | 0.817197  |
| 123 | 1 | 0 | 8.662964   | -1.643150 | 1.350639  |
| 124 | 1 | 0 | 7.959288   | -3.067569 | 2.195569  |
| 125 | 6 | 0 | 9.389728   | 0.555861  | 3.372156  |
| 126 | 1 | 0 | 10.455511  | 0.296534  | 3.316986  |
| 127 | 1 | 0 | 9.269775   | 1.520961  | 3.894484  |
| 128 | 1 | 0 | 8.836976   | -0.229017 | 3.908115  |
| 129 | 6 | 0 | 9.317934   | 3.252028  | 1.117185  |
| 130 | 1 | 0 | 9.741793   | 3.092481  | 2.120759  |
| 131 | 1 | 0 | 9.668339   | 2.464220  | 0.441000  |
| 132 | 1 | 0 | 9.619536   | 4.241811  | 0.748011  |
| 133 | 6 | 0 | 9.422483   | -3.647017 | -3.388076 |
| 134 | 1 | 0 | 8.688316   | -3.603050 | -4.211225 |
| 135 | 1 | 0 | 10.145762  | -2.825266 | -3.491055 |
| 136 | 1 | 0 | 9.944326   | -4.612438 | -3.414046 |
| 137 | 6 | 0 | 10.671942  | -1.039876 | -0.600891 |
| 138 | 1 | 0 | 11.727017  | -0.837728 | -0.828303 |
| 139 | 1 | 0 | 10.262657  | -0.254493 | 0.051301  |
| 140 | 1 | 0 | 10.580631  | -2.021946 | -0.107903 |
| 141 | 6 | 0 | 8.916020   | 1.788032  | -2.395161 |
| 142 | 1 | 0 | 9.700222   | 1.171121  | -2.858934 |
| 143 | 1 | 0 | 8.102082   | 1.965893  | -3.118261 |
| 144 | 1 | 0 | 9.334816   | 2.749234  | -2.070541 |

### Horizontal aggregate

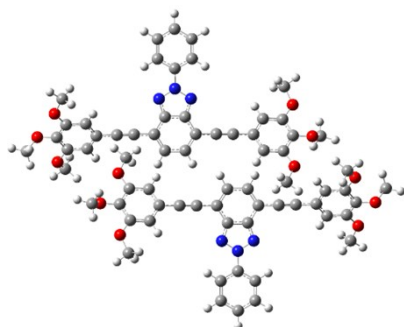

Center

Atomic

Atomic

Coordinates (Angstroms)

| Number | Number | Type | X          | Y         | Z         |
|--------|--------|------|------------|-----------|-----------|
| 1      | 6      | 0    | -3.570881  | 2.748074  | 0.392943  |
| 2      | 6      | 0    | -2.243501  | 3.170992  | 0.212862  |
| 3      | 6      | 0    | -1.147595  | 2.259491  | 0.323410  |
| 4      | 6      | 0    | -1.474971  | 0.966942  | 0.598995  |
| 5      | 6      | 0    | -2.826105  | 0.535626  | 0.779659  |
| 6      | 6      | 0    | -3.886660  | 1.386118  | 0.693843  |
| 7      | 1      | 0    | -0.695203  | 0.234258  | 0.690678  |
| 8      | 1      | 0    | -3.000395  | -0.501701 | 0.996532  |
| 9      | 7      | 0    | -2.263042  | 4.466086  | -0.047474 |
| 10     | 7      | 0    | -3.527897  | 4.770659  | -0.018778 |
| 11     | 7      | 0    | -4.355702  | 3.799579  | 0.236769  |
| 12     | 6      | 0    | -3.982160  | 6.099552  | -0.254461 |
| 13     | 6      | 0    | -3.055299  | 7.117289  | -0.412232 |
| 14     | 6      | 0    | -5.342778  | 6.352107  | -0.321542 |
| 15     | 6      | 0    | -3.505438  | 8.405223  | -0.641687 |
| 16     | 1      | 0    | -2.007555  | 6.899429  | -0.354052 |
| 17     | 6      | 0    | -5.774848  | 7.646259  | -0.550663 |
| 18     | 1      | 0    | -6.041693  | 5.549409  | -0.196149 |
| 19     | 6      | 0    | -4.862099  | 8.675530  | -0.711775 |
| 20     | 1      | 0    | -2.790022  | 9.198555  | -0.763509 |
| 21     | 1      | 0    | -6.829759  | 7.847189  | -0.604204 |
| 22     | 1      | 0    | -5.204849  | 9.678952  | -0.889766 |
| 23     | 6      | 0    | -5.239980  | 0.965423  | 0.906325  |
| 24     | 6      | 0    | -6.367877  | 0.634943  | 1.101241  |
| 25     | 6      | 0    | 0.207313   | 2.703757  | 0.167675  |
| 26     | 6      | 0    | 1.325723   | 3.097701  | 0.054453  |
| 27     | 6      | 0    | -7.734038  | 0.262287  | 1.362141  |
| 28     | 6      | 0    | -8.050783  | -1.062546 | 1.635812  |
| 29     | 6      | 0    | -8.716813  | 1.244741  | 1.355719  |
| 30     | 6      | 0    | -9.367776  | -1.404065 | 1.912024  |
| 31     | 1      | 0    | -7.272013  | -1.797823 | 1.638052  |
| 32     | 6      | 0    | -10.031616 | 0.895296  | 1.628373  |
| 33     | 1      | 0    | -8.439662  | 2.257710  | 1.146327  |
| 34     | 6      | 0    | -10.362784 | -0.429963 | 1.899929  |
| 35     | 6      | 0    | 2.673173   | 3.594485  | -0.067773 |
| 36     | 6      | 0    | 2.956588   | 4.574760  | -1.010910 |
| 37     | 6      | 0    | 3.666330   | 3.098624  | 0.768092  |
| 38     | 6      | 0    | 4.250661   | 5.065174  | -1.115024 |
| 39     | 1      | 0    | 2.169044   | 4.939268  | -1.638298 |
| 40     | 6      | 0    | 4.958098   | 3.597937  | 0.662784  |
| 41     | 1      | 0    | 3.417703   | 2.346305  | 1.488370  |
| 42     | 6      | 0    | 5.254450   | 4.576710  | -0.282223 |
| 43     | 1      | 0    | 1.187424   | -0.214985 | -1.564117 |
| 44     | 6      | 0    | 1.813702   | -1.004086 | -1.191647 |
| 45     | 6      | 0    | 1.289056   | -2.250034 | -1.024679 |
| 46     | 6      | 0    | 3.177598   | -0.695458 | -0.897498 |
| 47     | 6      | 0    | 2.189149   | -3.243107 | -0.525961 |
| 48     | 6      | 0    | -0.072434  | -2.566059 | -1.340229 |
| 49     | 6      | 0    | 4.056786   | -1.624133 | -0.429109 |
| 50     | 1      | 0    | 3.514169   | 0.311512  | -1.058609 |
| 51     | 6      | 0    | 3.530628   | -2.939847 | -0.237828 |
| 52     | 7      | 0    | 1.995782   | -4.521477 | -0.254782 |
| 53     | 6      | 0    | -1.197198  | -2.842621 | -1.619140 |
| 54     | 6      | 0    | 5.427473   | -1.314133 | -0.150844 |
| 55     | 7      | 0    | 4.110052   | -4.043480 | 0.199521  |
| 56     | 7      | 0    | 3.158014   | -4.930190 | 0.165181  |
| 57     | 6      | 0    | -2.545816  | -3.200488 | -1.974944 |
| 58     | 6      | 0    | 6.569636   | -1.053699 | 0.066976  |
| 59     | 6      | 0    | 3.376774   | -6.278343 | 0.567124  |
| 60     | 6      | 0    | -3.442729  | -2.214116 | -2.366847 |
| 61     | 6      | 0    | -2.926201  | -4.536296 | -1.931195 |
| 62     | 6      | 0    | 7.950130   | -0.733508 | 0.322910  |
| 63     | 6      | 0    | 2.324943   | -7.179476 | 0.529331  |
| 64     | 6      | 0    | 4.637956   | -6.666720 | 0.989543  |
| 65     | 6      | 0    | -4.733922  | -2.573484 | -2.729377 |
| 66     | 1      | 0    | -3.123546  | -1.192059 | -2.385666 |

|     |   |   |            |           |           |
|-----|---|---|------------|-----------|-----------|
| 67  | 6 | 0 | -4.219132  | -4.888012 | -2.292338 |
| 68  | 1 | 0 | -2.211965  | -5.271986 | -1.622291 |
| 69  | 6 | 0 | 8.400148   | 0.563785  | 0.112165  |
| 70  | 6 | 0 | 8.811639   | -1.726322 | 0.774011  |
| 71  | 6 | 0 | 2.546715   | -8.487421 | 0.921840  |
| 72  | 1 | 0 | 1.357742   | -6.857222 | 0.199041  |
| 73  | 6 | 0 | 4.841384   | -7.978668 | 1.378624  |
| 74  | 1 | 0 | 5.437150   | -5.953083 | 1.010359  |
| 75  | 6 | 0 | -5.122260  | -3.911062 | -2.702523 |
| 76  | 6 | 0 | 9.731722   | 0.872001  | 0.359251  |
| 77  | 1 | 0 | 7.713829   | 1.309884  | -0.232549 |
| 78  | 6 | 0 | 10.140853  | -1.411550 | 1.018695  |
| 79  | 1 | 0 | 8.434939   | -2.717866 | 0.921575  |
| 80  | 6 | 0 | 3.801098   | -8.892563 | 1.347011  |
| 81  | 1 | 0 | 1.733360   | -9.190150 | 0.894111  |
| 82  | 1 | 0 | 5.818529   | -8.284458 | 1.706917  |
| 83  | 6 | 0 | 10.602424  | -0.112370 | 0.822012  |
| 84  | 1 | 0 | 3.966401   | -9.910674 | 1.650607  |
| 85  | 8 | 0 | -9.777726  | -2.648232 | 2.214864  |
| 86  | 8 | 0 | -11.653284 | -0.776212 | 2.111920  |
| 87  | 8 | 0 | -11.053761 | 1.767866  | 1.659067  |
| 88  | 8 | 0 | 5.985349   | 3.198929  | 1.431111  |
| 89  | 8 | 0 | 6.525192   | 5.030529  | -0.411236 |
| 90  | 8 | 0 | 4.628932   | 6.018869  | -1.983105 |
| 91  | 8 | 0 | 11.885844  | 0.200503  | 1.117807  |
| 92  | 8 | 0 | 11.059746  | -2.297040 | 1.444682  |
| 93  | 8 | 0 | 10.267740  | 2.087911  | 0.177923  |
| 94  | 8 | 0 | -4.691529  | -6.147011 | -2.273462 |
| 95  | 8 | 0 | -6.361237  | -4.266283 | -3.115144 |
| 96  | 8 | 0 | -5.678959  | -1.704363 | -3.121031 |
| 97  | 6 | 0 | -8.887764  | -3.723039 | 2.100033  |
| 98  | 1 | 0 | -8.518498  | -3.818088 | 1.084062  |
| 99  | 1 | 0 | -8.050038  | -3.626644 | 2.783251  |
| 100 | 1 | 0 | -9.451821  | -4.607697 | 2.356348  |
| 101 | 6 | 0 | -12.082866 | -0.735443 | 3.451720  |
| 102 | 1 | 0 | -13.121922 | -1.034205 | 3.453309  |
| 103 | 1 | 0 | -11.510674 | -1.424896 | 4.062981  |
| 104 | 1 | 0 | -11.997865 | 0.267763  | 3.855302  |
| 105 | 6 | 0 | -10.832028 | 3.111028  | 1.332482  |
| 106 | 1 | 0 | -11.794396 | 3.597291  | 1.394351  |
| 107 | 1 | 0 | -10.148660 | 3.584010  | 2.031009  |
| 108 | 1 | 0 | -10.444329 | 3.215078  | 0.324056  |
| 109 | 6 | 0 | 5.781202   | 2.224858  | 2.423403  |
| 110 | 1 | 0 | 5.065268   | 2.564933  | 3.164718  |
| 111 | 1 | 0 | 5.446888   | 1.287836  | 1.993894  |
| 112 | 1 | 0 | 6.740563   | 2.074539  | 2.894331  |
| 113 | 6 | 0 | 6.831448   | 6.184011  | 0.338127  |
| 114 | 1 | 0 | 6.202313   | 7.015330  | 0.041481  |
| 115 | 1 | 0 | 6.714367   | 5.996410  | 1.399997  |
| 116 | 1 | 0 | 7.864319   | 6.426229  | 0.129395  |
| 117 | 6 | 0 | 3.706413   | 6.524631  | -2.908267 |
| 118 | 1 | 0 | 2.880789   | 7.026701  | -2.413773 |
| 119 | 1 | 0 | 4.247258   | 7.240044  | -3.509806 |
| 120 | 1 | 0 | 3.318214   | 5.740224  | -3.549754 |
| 121 | 6 | 0 | 9.454523   | 3.145671  | -0.266545 |
| 122 | 1 | 0 | 10.095672  | 4.014035  | -0.306403 |
| 123 | 1 | 0 | 9.059079   | 2.950603  | -1.257769 |
| 124 | 1 | 0 | 8.632637   | 3.332436  | 0.411820  |
| 125 | 6 | 0 | 12.798212  | 0.092676  | 0.052096  |
| 126 | 1 | 0 | 13.766743  | 0.372839  | 0.442888  |
| 127 | 1 | 0 | 12.842736  | -0.926249 | -0.317975 |
| 128 | 1 | 0 | 12.530471  | 0.763579  | -0.756732 |
| 129 | 6 | 0 | 10.678215  | -3.614189 | 1.723067  |
| 130 | 1 | 0 | 10.306173  | -4.118286 | 0.836304  |
| 131 | 1 | 0 | 11.568895  | -4.117903 | 2.069026  |
| 132 | 1 | 0 | 9.922389   | -3.652979 | 2.501257  |
| 133 | 6 | 0 | -3.827837  | -7.208856 | -1.980237 |
| 134 | 1 | 0 | -2.997556  | -7.249264 | -2.677952 |

|     |   |   |           |           |           |
|-----|---|---|-----------|-----------|-----------|
| 135 | 1 | 0 | -3.442492 | -7.142366 | -0.967256 |
| 136 | 1 | 0 | -4.416329 | -8.109456 | -2.076185 |
| 137 | 6 | 0 | -7.361010 | -4.247474 | -2.126324 |
| 138 | 1 | 0 | -7.132780 | -4.953964 | -1.334280 |
| 139 | 1 | 0 | -7.476714 | -3.252732 | -1.709903 |
| 140 | 1 | 0 | -8.282542 | -4.540639 | -2.609757 |
| 141 | 6 | 0 | -5.381248 | -0.336620 | -3.201759 |
| 142 | 1 | 0 | -6.283903 | 0.144696  | -3.547488 |
| 143 | 1 | 0 | -5.110618 | 0.068582  | -2.233124 |
| 144 | 1 | 0 | -4.582458 | -0.147827 | -3.911932 |

1e

Vertical aggregate

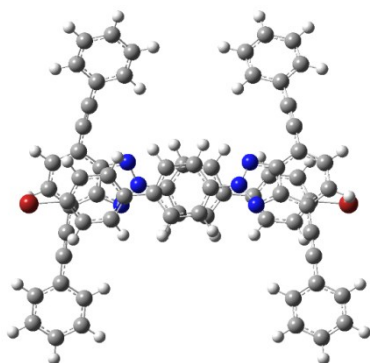

| Center Number | Atomic Number | Atomic Type | Coordinates (Angstroms) |           |           |
|---------------|---------------|-------------|-------------------------|-----------|-----------|
|               |               |             | X                       | Y         | Z         |
| 1             | 6             | 0           | -4.344671               | 1.032428  | -0.967382 |
| 2             | 6             | 0           | -4.540469               | -0.278086 | -1.501199 |
| 3             | 6             | 0           | -5.849305               | -0.847121 | -1.627795 |
| 4             | 6             | 0           | -6.914418               | -0.019125 | -1.225404 |
| 5             | 6             | 0           | -6.717910               | 1.269289  | -0.679268 |
| 6             | 6             | 0           | -5.440287               | 1.831953  | -0.507473 |
| 7             | 1             | 0           | -7.926957               | -0.413076 | -1.286126 |
| 8             | 1             | 0           | -7.584814               | 1.829461  | -0.333272 |
| 9             | 7             | 0           | -3.333714               | -0.809537 | -1.797542 |
| 10            | 7             | 0           | -2.487738               | 0.175989  | -1.451975 |
| 11            | 7             | 0           | -3.021070               | 1.300466  | -0.949408 |
| 12            | 6             | 0           | -1.079927               | 0.038276  | -1.617535 |
| 13            | 6             | 0           | -0.520956               | -1.237871 | -1.796731 |
| 14            | 6             | 0           | -0.262177               | 1.180478  | -1.582979 |
| 15            | 6             | 0           | 0.863406                | -1.361779 | -1.923654 |
| 16            | 1             | 0           | -1.173003               | -2.107038 | -1.833909 |
| 17            | 6             | 0           | 1.119484                | 1.036887  | -1.704656 |
| 18            | 1             | 0           | -0.716340               | 2.156329  | -1.432123 |
| 19            | 6             | 0           | 1.713412                | -0.234319 | -1.867441 |
| 20            | 1             | 0           | 1.296109                | -2.349973 | -2.077104 |
| 21            | 1             | 0           | 1.756978                | 1.913869  | -1.610837 |
| 22            | 6             | 0           | 3.184212                | -0.378279 | -1.947385 |
| 23            | 6             | 0           | 3.985022                | 0.640531  | -2.509060 |
| 24            | 6             | 0           | 3.828561                | -1.523643 | -1.431144 |



|    |    |   |           |           |           |
|----|----|---|-----------|-----------|-----------|
| 25 | 6  | 0 | 5.377665  | 0.530021  | -2.548598 |
| 26 | 1  | 0 | 3.514681  | 1.531970  | -2.921988 |
| 27 | 6  | 0 | 5.221633  | -1.651508 | -1.462195 |
| 28 | 1  | 0 | 3.239830  | -2.299830 | -0.944083 |
| 29 | 6  | 0 | 5.982652  | -0.618093 | -2.021670 |
| 30 | 1  | 0 | 5.984297  | 1.330011  | -2.967924 |
| 31 | 1  | 0 | 5.708039  | -2.519396 | -1.022051 |
| 32 | 6  | 0 | 1.080169  | 0.038006  | 1.617769  |
| 33 | 7  | 0 | 2.487952  | 0.176042  | 1.452239  |
| 34 | 6  | 0 | 0.521468  | -1.238256 | 1.797003  |
| 35 | 6  | 0 | 0.262171  | 1.180027  | 1.583114  |
| 36 | 7  | 0 | 3.334160  | -0.809323 | 1.797711  |
| 37 | 7  | 0 | 3.021024  | 1.300676  | 0.949747  |
| 38 | 6  | 0 | -0.862877 | -1.362460 | 1.923845  |
| 39 | 1  | 0 | 1.173703  | -2.107280 | 1.834264  |
| 40 | 6  | 0 | -1.119463 | 1.036142  | 1.704714  |
| 41 | 1  | 0 | 0.716128  | 2.155966  | 1.432230  |
| 42 | 6  | 0 | 4.540790  | -0.277576 | 1.501379  |
| 43 | 6  | 0 | 4.344680  | 1.032931  | 0.967663  |
| 44 | 6  | 0 | -1.713123 | -0.235185 | 1.867520  |
| 45 | 1  | 0 | -1.295379 | -2.350739 | 2.077318  |
| 46 | 1  | 0 | -1.757154 | 1.912967  | 1.610780  |
| 47 | 6  | 0 | 5.849767  | -0.846314 | 1.627867  |
| 48 | 6  | 0 | 5.440084  | 1.832729  | 0.507719  |
| 49 | 6  | 0 | -3.183899 | -0.379445 | 1.947358  |
| 50 | 6  | 0 | 6.914669  | -0.018050 | 1.225454  |
| 51 | 6  | 0 | 6.717845  | 1.270347  | 0.679386  |
| 52 | 6  | 0 | -3.984950 | 0.639197  | 2.508995  |
| 53 | 6  | 0 | -3.827981 | -1.524929 | 1.431053  |
| 54 | 1  | 0 | 7.927301  | -0.411776 | 1.286102  |
| 55 | 1  | 0 | 7.584601  | 1.830718  | 0.333345  |
| 56 | 6  | 0 | -5.377574 | 0.528406  | 2.548444  |
| 57 | 1  | 0 | -3.514813 | 1.530722  | 2.921968  |
| 58 | 6  | 0 | -5.221030 | -1.653077 | 1.462018  |
| 59 | 1  | 0 | -3.239057 | -2.300995 | 0.944030  |
| 60 | 6  | 0 | -5.982294 | -0.619827 | 2.021466  |
| 61 | 1  | 0 | -5.984394 | 1.328263  | 2.967750  |
| 62 | 1  | 0 | -5.707232 | -2.521061 | 1.021836  |
| 63 | 35 | 0 | -7.893954 | -0.756251 | 2.023110  |
| 64 | 35 | 0 | 7.894340  | -0.754113 | -2.023385 |
| 65 | 6  | 0 | -5.206195 | 3.066307  | 0.136984  |
| 66 | 6  | 0 | -4.918264 | 4.096735  | 0.739646  |
| 67 | 6  | 0 | -6.038283 | -2.171231 | -2.081404 |
| 68 | 6  | 0 | -6.171050 | -3.336783 | -2.444426 |
| 69 | 6  | 0 | 6.039085  | -2.170402 | 2.081388  |
| 70 | 6  | 0 | 6.172161  | -3.335943 | 2.444332  |
| 71 | 6  | 0 | 5.205578  | 3.067024  | -0.136700 |
| 72 | 6  | 0 | 4.917071  | 4.097290  | -0.739366 |
| 73 | 6  | 0 | 6.307215  | -4.685470 | 2.867661  |
| 74 | 6  | 0 | 5.161662  | -5.432679 | 3.249482  |
| 75 | 6  | 0 | 7.581032  | -5.310184 | 2.911333  |
| 76 | 6  | 0 | 5.293038  | -6.762973 | 3.660120  |
| 77 | 1  | 0 | 4.184126  | -4.951827 | 3.218031  |
| 78 | 6  | 0 | 7.699072  | -6.641300 | 3.324023  |
| 79 | 1  | 0 | 8.461446  | -4.738504 | 2.618569  |
| 80 | 6  | 0 | 6.558933  | -7.372494 | 3.698924  |
| 81 | 1  | 0 | 4.406292  | -7.327243 | 3.951991  |
| 82 | 1  | 0 | 8.683038  | -7.111228 | 3.353649  |
| 83 | 1  | 0 | 6.656389  | -8.410281 | 4.019934  |
| 84 | 6  | 0 | 4.547787  | 5.274805  | -1.442859 |
| 85 | 6  | 0 | 3.174778  | 5.592777  | -1.620324 |
| 86 | 6  | 0 | 5.529322  | 6.143176  | -1.987487 |
| 87 | 6  | 0 | 2.802250  | 6.743047  | -2.322648 |
| 88 | 1  | 0 | 2.420955  | 4.927898  | -1.198252 |
| 89 | 6  | 0 | 5.143931  | 7.291616  | -2.686774 |
| 90 | 1  | 0 | 6.583472  | 5.901756  | -1.852590 |
| 91 | 6  | 0 | 3.782676  | 7.596138  | -2.858193 |
| 92 | 1  | 0 | 1.744739  | 6.976386  | -2.453652 |

|     |   |   |           |           |           |
|-----|---|---|-----------|-----------|-----------|
| 93  | 1 | 0 | 5.907132  | 7.951943  | -3.100655 |
| 94  | 1 | 0 | 3.487588  | 8.492139  | -3.405419 |
| 95  | 6 | 0 | -6.305747 | -4.686320 | -2.867844 |
| 96  | 6 | 0 | -7.579366 | -5.311454 | -2.911304 |
| 97  | 6 | 0 | -5.160027 | -5.433114 | -3.249973 |
| 98  | 6 | 0 | -7.697051 | -6.642573 | -3.324083 |
| 99  | 1 | 0 | -8.459908 | -4.740091 | -2.618306 |
| 100 | 6 | 0 | -5.291048 | -6.763416 | -3.660698 |
| 101 | 1 | 0 | -4.182644 | -4.951939 | -3.218688 |
| 102 | 6 | 0 | -6.556748 | -7.373356 | -3.699287 |
| 103 | 1 | 0 | -8.680867 | -7.112825 | -3.353543 |
| 104 | 1 | 0 | -4.404175 | -7.327365 | -3.952807 |
| 105 | 1 | 0 | -6.653924 | -8.411148 | -4.020366 |
| 106 | 6 | 0 | -4.549828 | 5.274543  | 1.443099  |
| 107 | 6 | 0 | -3.177058 | 5.592942  | 1.621613  |
| 108 | 6 | 0 | -5.532058 | 6.142845  | 1.986587  |
| 109 | 6 | 0 | -2.805431 | 6.743572  | 2.323829  |
| 110 | 1 | 0 | -2.422698 | 4.928106  | 1.200438  |
| 111 | 6 | 0 | -5.147567 | 7.291650  | 2.685769  |
| 112 | 1 | 0 | -6.586028 | 5.901094  | 1.850879  |
| 113 | 6 | 0 | -3.786539 | 7.596602  | 2.858219  |
| 114 | 1 | 0 | -1.748095 | 6.977240  | 2.455648  |
| 115 | 1 | 0 | -5.911293 | 7.951927  | 3.098760  |
| 116 | 1 | 0 | -3.492154 | 8.492888  | 3.405357  |

### Horizontal aggregate

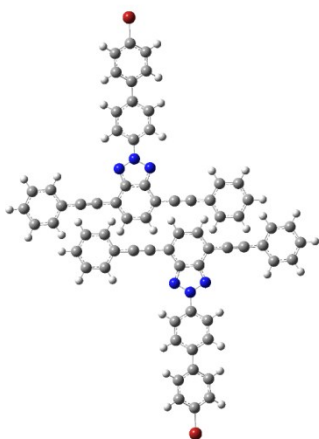

| Center Number | Atomic Number | Atomic Type | Coordinates (Angstroms) |           |          |
|---------------|---------------|-------------|-------------------------|-----------|----------|
|               |               |             | X                       | Y         | Z        |
| 1             | 6             | 0           | 3.641368                | 1.755677  | 0.790854 |
| 2             | 6             | 0           | 3.328052                | 0.359893  | 0.865143 |
| 3             | 6             | 0           | 1.980601                | -0.102822 | 1.030924 |
| 4             | 6             | 0           | 0.999607                | 0.905747  | 1.109844 |
| 5             | 6             | 0           | 1.308995                | 2.282683  | 1.037756 |
| 6             | 6             | 0           | 2.624535                | 2.762625  | 0.880646 |
| 7             | 1             | 0           | -0.041760               | 0.609910  | 1.217243 |
| 8             | 1             | 0           | 0.496656                | 3.004366  | 1.090333 |
| 9             | 7             | 0           | 4.473687                | -0.347116 | 0.749865 |
| 10            | 7             | 0           | 5.400521                | 0.616441  | 0.615708 |
| 11            | 7             | 0           | 4.975929                | 1.891394  | 0.631317 |
| 12            | 6             | 0           | 6.781589                | 0.299217  | 0.460914 |
| 13            | 6             | 0           | 7.200260                | -1.042277 | 0.520106 |
| 14            | 6             | 0           | 7.713549                | 1.331356  | 0.250049 |
| 15            | 6             | 0           | 8.555425                | -1.341109 | 0.367147 |
| 16            | 1             | 0           | 6.466496                | -1.825058 | 0.695343 |
| 17            | 6             | 0           | 9.063541                | 1.010852  | 0.097663 |
| 18            | 1             | 0           | 7.368934                | 2.361053  | 0.197292 |
| 19            | 6             | 0           | 9.516728                | -0.327081 | 0.152405 |

|    |   |   |           |           |           |
|----|---|---|-----------|-----------|-----------|
| 20 | 1 | 0 | 8.880495  | -2.378543 | 0.443439  |
| 21 | 1 | 0 | 9.778063  | 1.810414  | -0.096591 |
| 22 | 6 | 0 | 2.921613  | 4.141597  | 0.805460  |
| 23 | 6 | 0 | 3.162293  | 5.343331  | 0.733176  |
| 24 | 6 | 0 | 1.664487  | -1.477605 | 1.106213  |
| 25 | 6 | 0 | 1.389430  | -2.672411 | 1.175127  |
| 26 | 6 | 0 | 3.410033  | 6.738395  | 0.632419  |
| 27 | 6 | 0 | 2.343990  | 7.666787  | 0.771640  |
| 28 | 6 | 0 | 4.718588  | 7.226732  | 0.379155  |
| 29 | 6 | 0 | 2.586364  | 9.039066  | 0.655018  |
| 30 | 1 | 0 | 1.338725  | 7.291828  | 0.956542  |
| 31 | 6 | 0 | 4.947378  | 8.601972  | 0.265902  |
| 32 | 1 | 0 | 5.536783  | 6.514695  | 0.273412  |
| 33 | 6 | 0 | 3.885487  | 9.512608  | 0.402093  |
| 34 | 1 | 0 | 1.760083  | 9.743153  | 0.763679  |
| 35 | 1 | 0 | 5.956809  | 8.966207  | 0.070305  |
| 36 | 1 | 0 | 4.069337  | 10.583905 | 0.312245  |
| 37 | 6 | 0 | 1.058517  | -4.051967 | 1.253485  |
| 38 | 6 | 0 | -0.285587 | -4.458585 | 1.461397  |
| 39 | 6 | 0 | 2.065387  | -5.044165 | 1.117064  |
| 40 | 6 | 0 | -0.607118 | -5.817211 | 1.529692  |
| 41 | 1 | 0 | -1.062165 | -3.701308 | 1.550114  |
| 42 | 6 | 0 | 1.730274  | -6.400176 | 1.186624  |
| 43 | 1 | 0 | 3.096905  | -4.731389 | 0.956196  |
| 44 | 6 | 0 | 0.395591  | -6.791719 | 1.392367  |
| 45 | 1 | 0 | -1.644266 | -6.117107 | 1.670951  |
| 46 | 1 | 0 | 2.511021  | -7.154536 | 1.079509  |
| 47 | 1 | 0 | 0.134095  | -7.849451 | 1.440050  |
| 48 | 1 | 0 | 0.041636  | -0.609320 | -1.217681 |
| 49 | 6 | 0 | -0.999662 | -0.905334 | -1.110115 |
| 50 | 6 | 0 | -1.980724 | 0.103170  | -1.031096 |
| 51 | 6 | 0 | -1.308936 | -2.282287 | -1.038040 |
| 52 | 6 | 0 | -3.328123 | -0.359628 | -0.865151 |
| 53 | 6 | 0 | -1.664646 | 1.477956  | -1.106509 |
| 54 | 6 | 0 | -2.624429 | -2.762314 | -0.880829 |
| 55 | 1 | 0 | -0.496561 | -3.003916 | -1.090774 |
| 56 | 6 | 0 | -3.641323 | -1.755440 | -0.790869 |
| 57 | 7 | 0 | -4.473799 | 0.347291  | -0.749731 |
| 58 | 6 | 0 | -1.389478 | 2.672726  | -1.175564 |
| 59 | 6 | 0 | -2.921432 | -4.141309 | -0.805781 |
| 60 | 7 | 0 | -4.975859 | -1.891263 | -0.631203 |
| 61 | 7 | 0 | -5.400546 | -0.616343 | -0.615510 |
| 62 | 6 | 0 | -1.058519 | 4.052258  | -1.254142 |
| 63 | 6 | 0 | -3.162105 | -5.343048 | -0.733592 |
| 64 | 6 | 0 | -6.781626 | -0.299237 | -0.460594 |
| 65 | 6 | 0 | 0.285638  | 4.458823  | -1.461827 |
| 66 | 6 | 0 | -2.065420 | 5.044489  | -1.118196 |
| 67 | 6 | 0 | -3.409826 | -6.738123 | -0.632973 |
| 68 | 6 | 0 | -7.200413 | 1.042226  | -0.519688 |
| 69 | 6 | 0 | -7.713488 | -1.331460 | -0.249706 |
| 70 | 6 | 0 | 0.607186  | 5.817435  | -1.530371 |
| 71 | 1 | 0 | 1.062238  | 3.701523  | -1.550163 |
| 72 | 6 | 0 | -1.730292 | 6.400481  | -1.188020 |
| 73 | 1 | 0 | -3.096976 | 4.731753  | -0.957504 |
| 74 | 6 | 0 | -2.343795 | -7.666502 | -0.772382 |
| 75 | 6 | 0 | -4.718363 | -7.226487 | -0.379667 |
| 76 | 6 | 0 | -8.555591 | 1.340939  | -0.366613 |
| 77 | 1 | 0 | -6.466730 | 1.825076  | -0.694948 |
| 78 | 6 | 0 | -9.063496 | -1.011074 | -0.097211 |
| 79 | 1 | 0 | -7.368786 | -2.361132 | -0.197024 |
| 80 | 6 | 0 | -0.395562 | 6.791973  | -1.393542 |
| 81 | 1 | 0 | 1.644373  | 6.117306  | -1.671405 |
| 82 | 1 | 0 | -2.511064 | 7.154868  | -1.081282 |
| 83 | 6 | 0 | -2.586163 | -9.038795 | -0.655904 |
| 84 | 1 | 0 | -1.338549 | -7.291528 | -0.957364 |
| 85 | 6 | 0 | -4.947148 | -8.601740 | -0.266558 |
| 86 | 1 | 0 | -5.536548 | -6.514460 | -0.273779 |
| 87 | 6 | 0 | -9.516799 | 0.326823  | -0.151862 |

|     |    |   |            |            |           |
|-----|----|---|------------|------------|-----------|
| 88  | 1  | 0 | -8.880746  | 2.378352   | -0.442829 |
| 89  | 1  | 0 | -9.777936  | -1.810707  | 0.097054  |
| 90  | 1  | 0 | -0.134060  | 7.849695   | -1.441423 |
| 91  | 6  | 0 | -3.885269  | -9.512364  | -0.402934 |
| 92  | 1  | 0 | -1.759894  | -9.742873  | -0.764711 |
| 93  | 1  | 0 | -5.956566  | -8.965995  | -0.070927 |
| 94  | 1  | 0 | -4.069115  | -10.583670 | -0.313195 |
| 95  | 6  | 0 | 10.952491  | -0.654544  | -0.012082 |
| 96  | 6  | 0 | 11.358946  | -1.857945  | -0.631414 |
| 97  | 6  | 0 | 11.956870  | 0.228758   | 0.443696  |
| 98  | 6  | 0 | 12.712936  | -2.172699  | -0.794711 |
| 99  | 1  | 0 | 10.604812  | -2.544488  | -1.016652 |
| 100 | 6  | 0 | 13.315251  | -0.069412  | 0.288060  |
| 101 | 1  | 0 | 11.671058  | 1.150144   | 0.951369  |
| 102 | 6  | 0 | 13.682677  | -1.271545  | -0.332810 |
| 103 | 1  | 0 | 13.012681  | -3.098472  | -1.283189 |
| 104 | 1  | 0 | 14.078934  | 0.615794   | 0.652034  |
| 105 | 6  | 0 | -10.952575 | 0.654175   | 0.012736  |
| 106 | 6  | 0 | -11.956933 | -0.229190  | -0.442967 |
| 107 | 6  | 0 | -11.359062 | 1.857559   | 0.632077  |
| 108 | 6  | 0 | -13.315321 | 0.068903   | -0.287249 |
| 109 | 1  | 0 | -11.671101 | -1.150563  | -0.950654 |
| 110 | 6  | 0 | -12.713059 | 2.172240   | 0.795455  |
| 111 | 1  | 0 | -10.604943 | 2.544151   | 1.017257  |
| 112 | 6  | 0 | -13.682778 | 1.271026   | 0.333625  |
| 113 | 1  | 0 | -14.078988 | -0.616351  | -0.651167 |
| 114 | 1  | 0 | -13.012824 | 3.098003   | 1.283938  |
| 115 | 35 | 0 | 15.542013  | -1.687379  | -0.555643 |
| 116 | 35 | 0 | -15.542121 | 1.686764   | 0.556559  |

## Collection of spectra

<sup>1</sup>H NMR (CDCl<sub>3</sub>, 500 MHz, 298 K) of compound **2c**

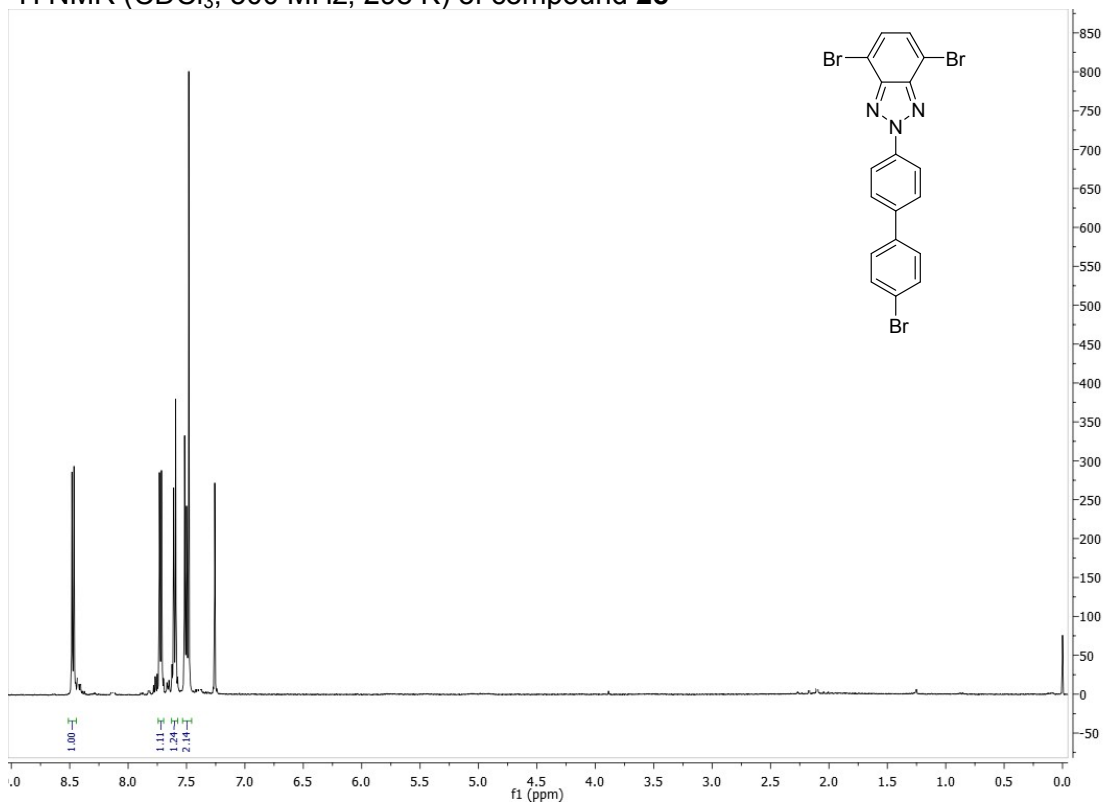

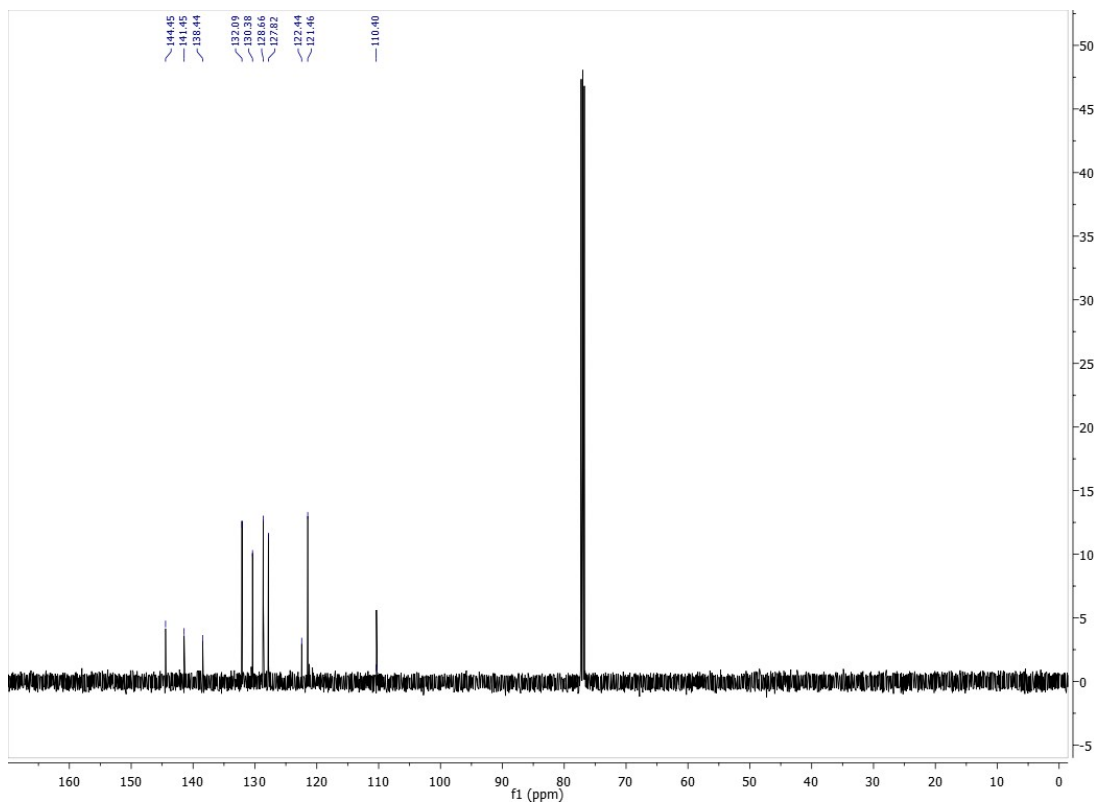

$^1\text{H}$  NMR ( $\text{CDCl}_3$ , 500 MHz, 298 K) of compound **1a**

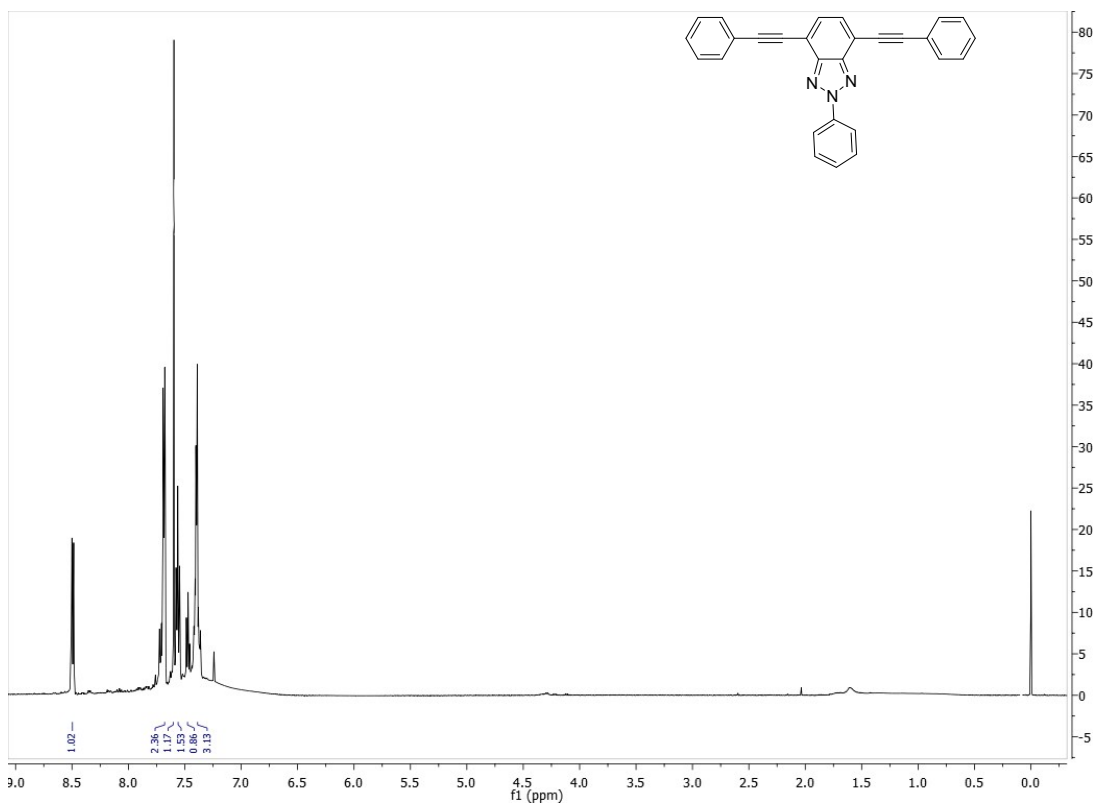

$^{13}\text{C}$  NMR ( $\text{CDCl}_3$ , 125 MHz, 298 K) of compound **1a**

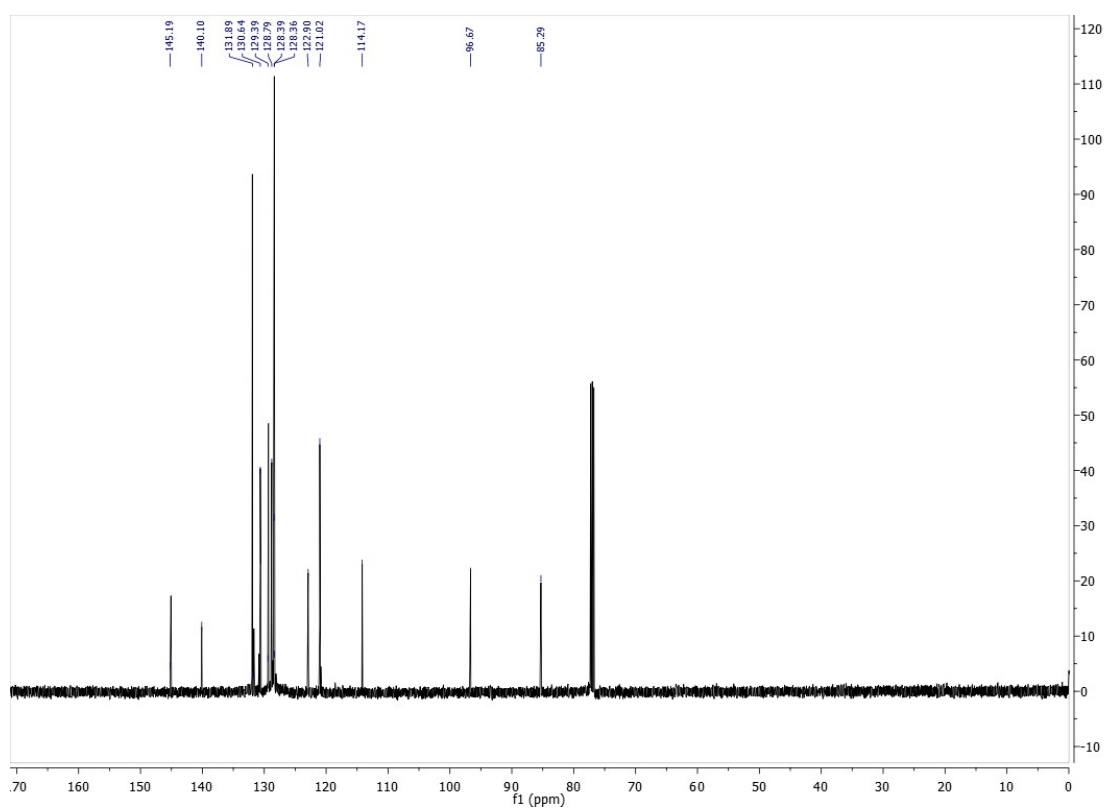

$^1\text{H}$  NMR ( $\text{CDCl}_3$ , 500 MHz, 298 K) of compound **1c**

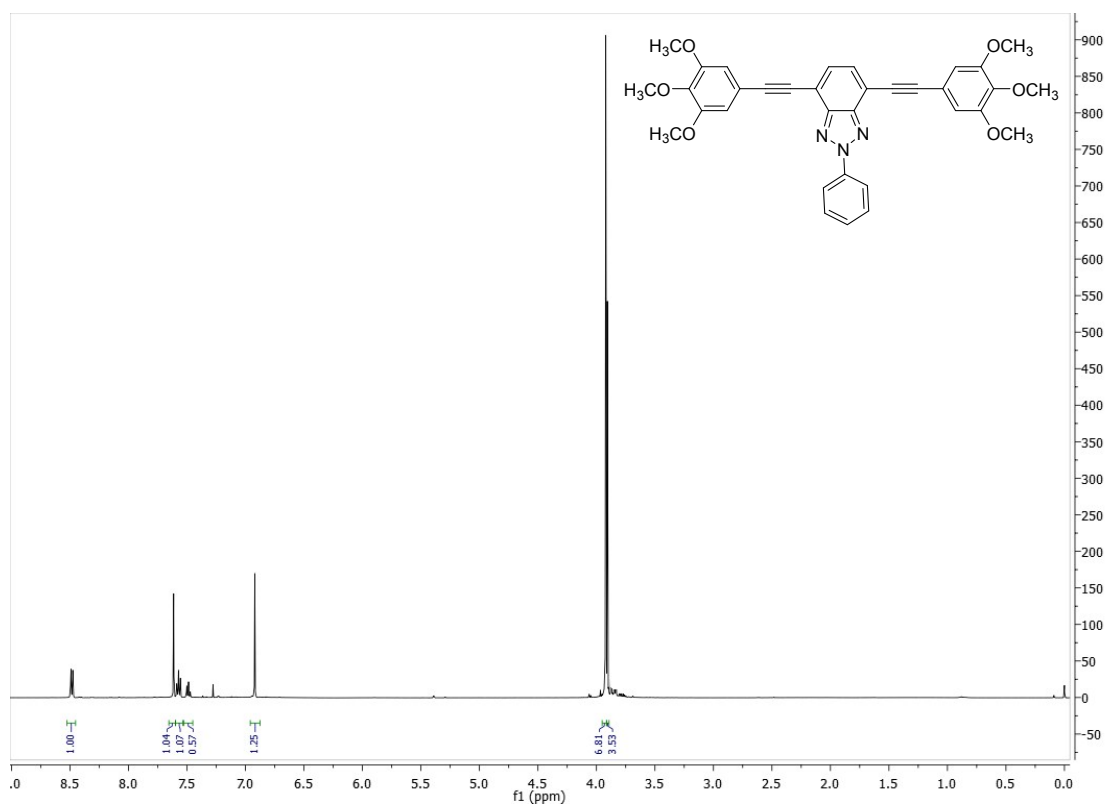

$^{13}\text{C}$  NMR ( $\text{CDCl}_3$ , 125 MHz, 298 K) of compound **1c**

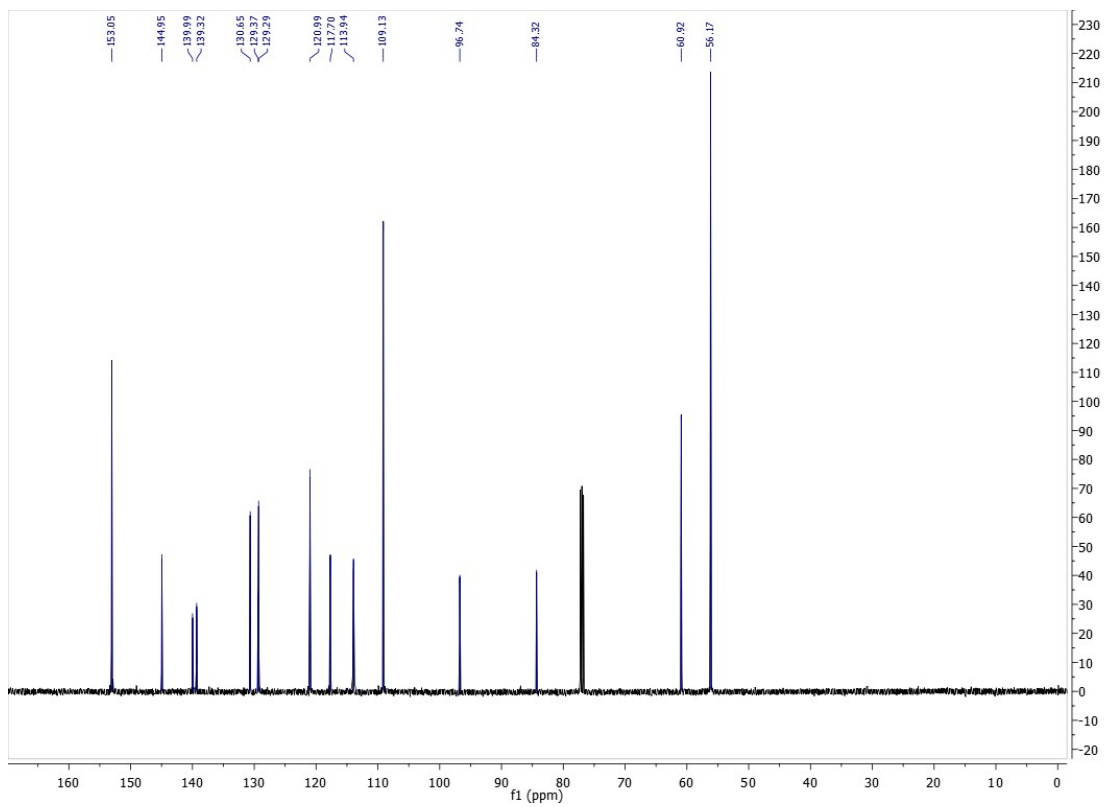

<sup>1</sup>H NMR (CDCl<sub>3</sub>, 500 MHz, 298 K) of compound **1e**

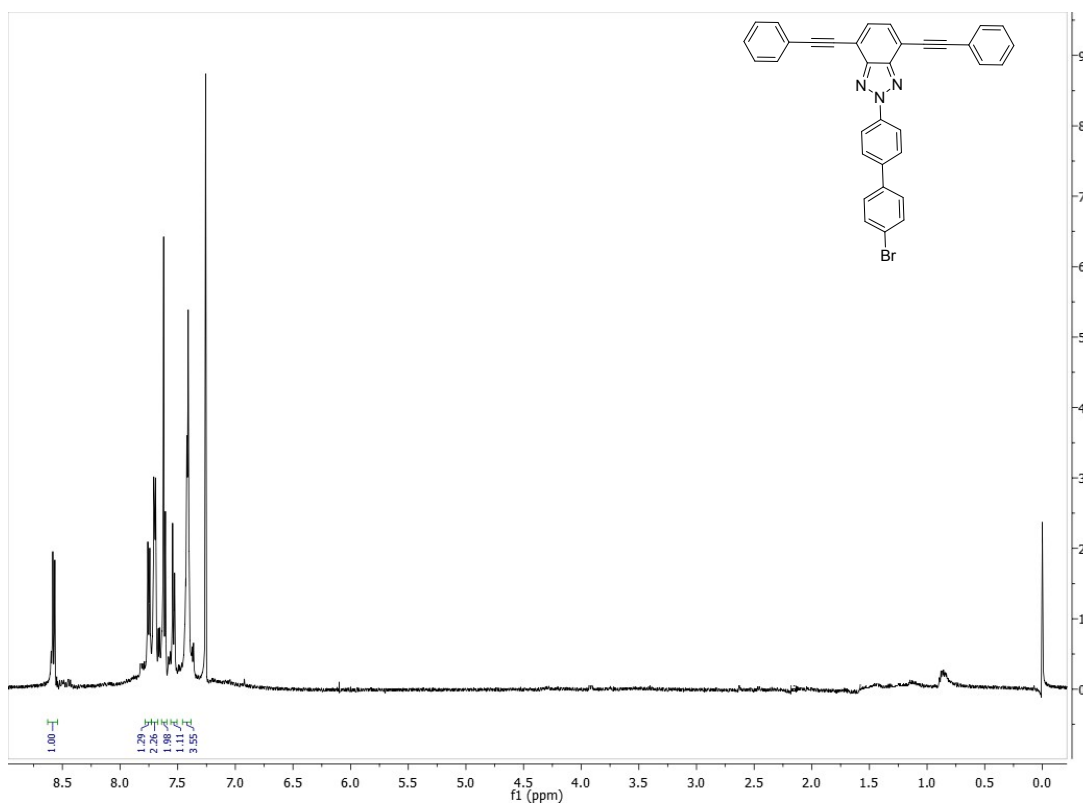

$^{13}\text{C}$  NMR ( $\text{CDCl}_3$ , 125 MHz, 298 K) of compound **1e**

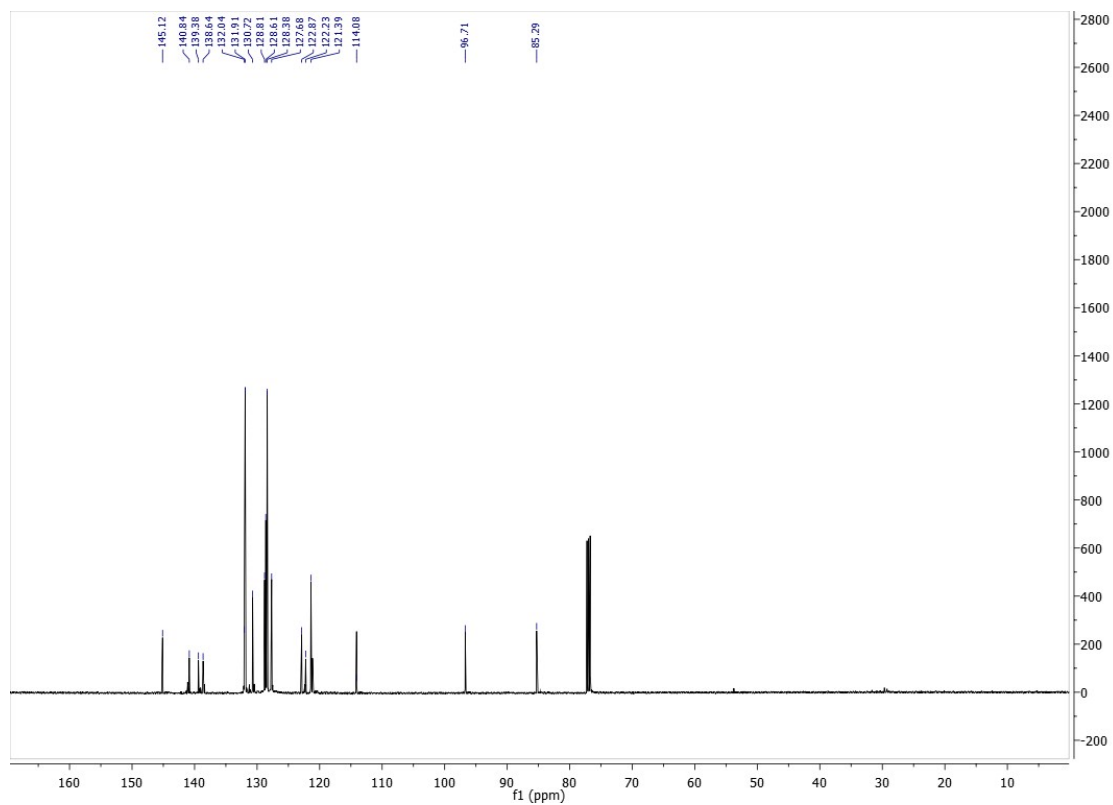

$^1\text{H}$  NMR ( $\text{CDCl}_3$ , 500 MHz, 298 K) of compound **1f**

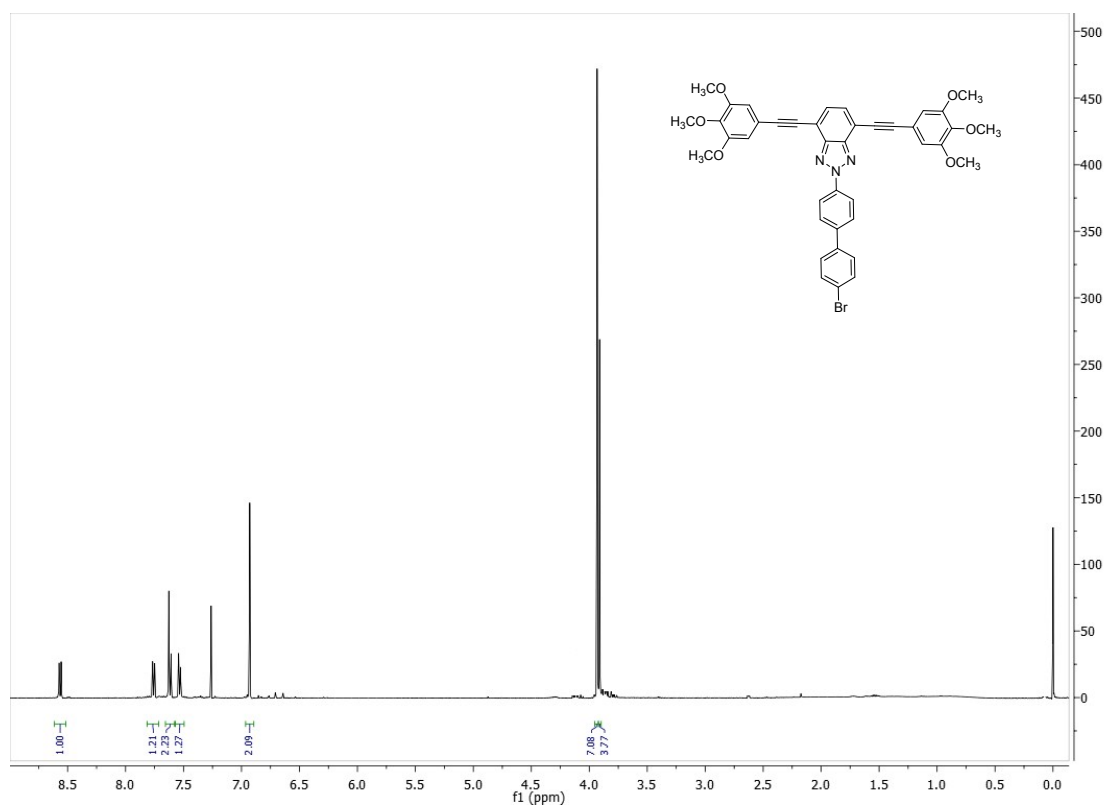



$^{13}\text{C}$  NMR ( $\text{CDCl}_3$ , 125 MHz, 298 K) of compound **1f**

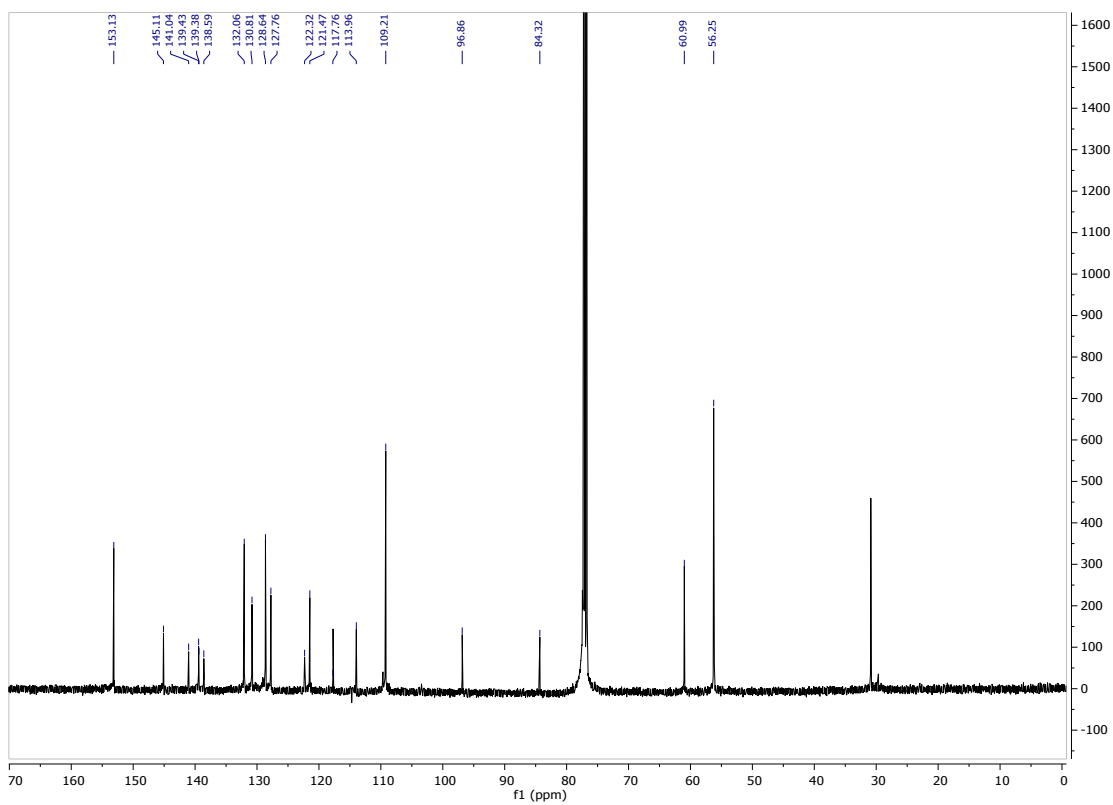

$^1\text{H}$  NMR ( $\text{CDCl}_3$ , 500 MHz, 298 K) of compound **1g**

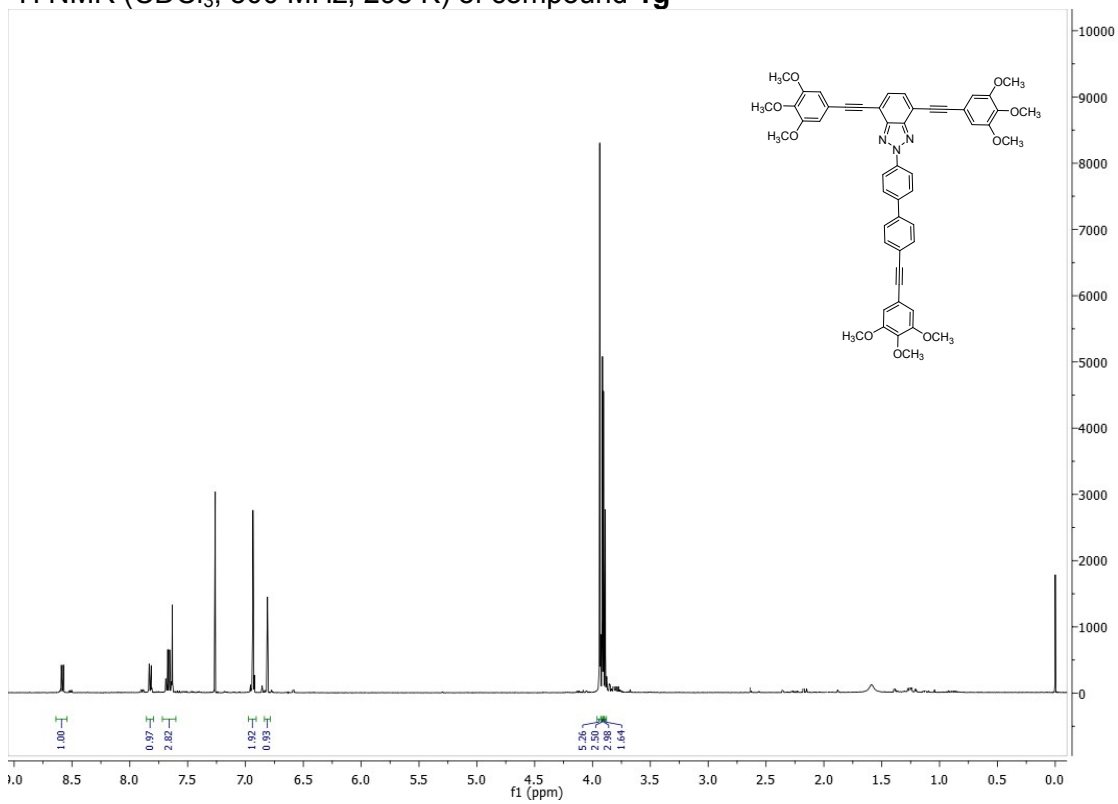

$^{13}\text{C}$  NMR ( $\text{CDCl}_3$ , 125 MHz, 298 K) of compound **1g**

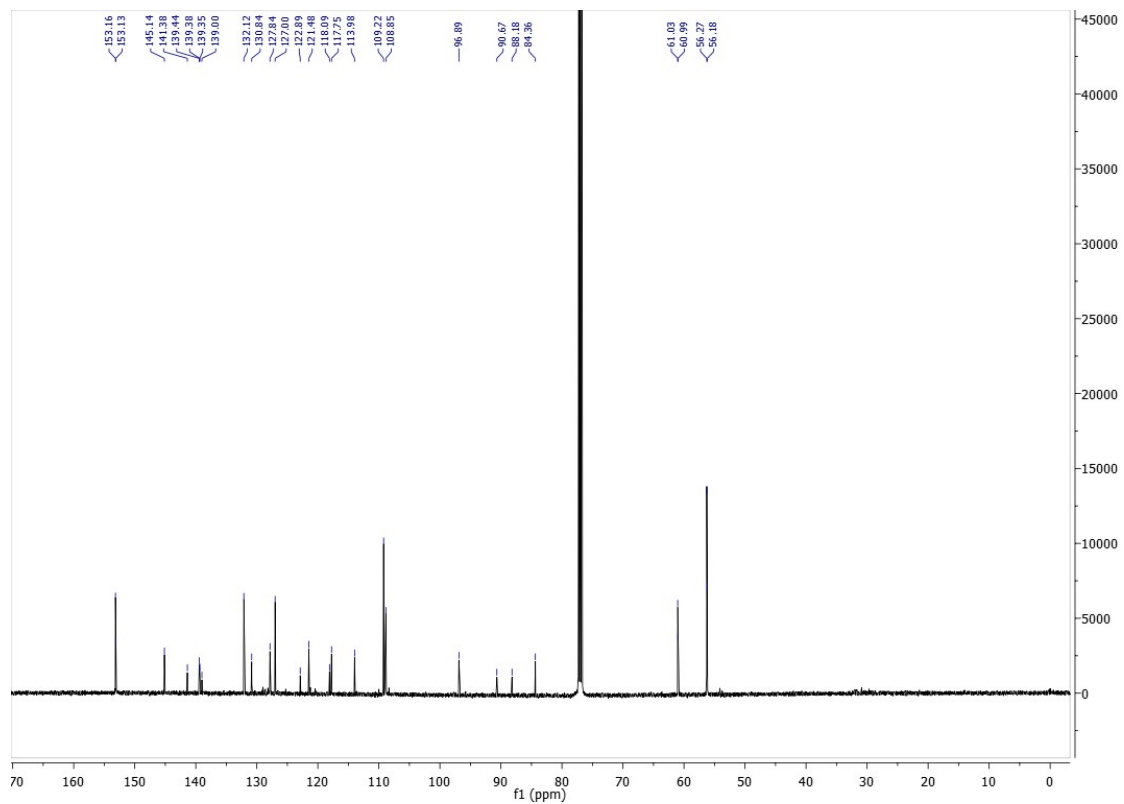

Supplement: c6ra02473d1.pdf [file c6ra02473d1.pdf]
